# Supplementary material for: Conjunctive Analyses of BSA-Seq and BSR-Seq to Identify Candidate Genes Controlling the Black Lemma and Pericarp Trait in Barley
Source: Preprints.org preprint supplement (doi:10.20944/preprints202304.0910.v1), 2023-04-25
Supplement: Supplementary file 1 [file supplementary]

## Sheet: BSA targetR genes location
targetRegion.1H_494452003-504575281.allGenes
ID	Chr	Start	End
HORVU.MOREX.r3.1HG0084530	1H	494477956	494478882
HORVU.MOREX.r3.1HG0084540	1H	494482872	494485110
HORVU.MOREX.r3.1HG0084570	1H	494524958	494525468
HORVU.MOREX.r3.1HG0084580	1H	494544777	494545889
HORVU.MOREX.r3.1HG0084590	1H	494546080	494547585
HORVU.MOREX.r3.1HG0084600	1H	494548738	494551533
HORVU.MOREX.r3.1HG0084610	1H	494552686	494555481
HORVU.MOREX.r3.1HG0084620	1H	494556634	494560476
HORVU.MOREX.r3.1HG0084680	1H	494577792	494581404
HORVU.MOREX.r3.1HG0084690	1H	494610951	494611925
HORVU.MOREX.r3.1HG0084700	1H	494618029	494619251
HORVU.MOREX.r3.1HG0084710	1H	494619318	494620379
HORVU.MOREX.r3.1HG0084720	1H	494626805	494627767
HORVU.MOREX.r3.1HG0084730	1H	494627936	494629155
HORVU.MOREX.r3.1HG0084740	1H	494629882	494636460
HORVU.MOREX.r3.1HG0084760	1H	494674578	494676069
HORVU.MOREX.r3.1HG0084770	1H	494681598	494685708
HORVU.MOREX.r3.1HG0084780	1H	494687377	494688456
HORVU.MOREX.r3.1HG0084790	1H	494688507	494689319
HORVU.MOREX.r3.1HG0084840	1H	494727545	494727964
HORVU.MOREX.r3.1HG0084850	1H	494735823	494738748
HORVU.MOREX.r3.1HG0084860	1H	494776681	494780520
HORVU.MOREX.r3.1HG0084870	1H	494841650	494842968
HORVU.MOREX.r3.1HG0084890	1H	494851659	494856092
HORVU.MOREX.r3.1HG0084900	1H	494857338	494866155
HORVU.MOREX.r3.1HG0084920	1H	494869939	494872474
HORVU.MOREX.r3.1HG0084940	1H	494887277	494887680
HORVU.MOREX.r3.1HG0084970	1H	494997785	495003054
HORVU.MOREX.r3.1HG0084980	1H	495027246	495027856
HORVU.MOREX.r3.1HG0084990	1H	495100636	495103178
HORVU.MOREX.r3.1HG0085090	1H	495249779	495251957
HORVU.MOREX.r3.1HG0085100	1H	495260455	495262587
HORVU.MOREX.r3.1HG0085110	1H	495310383	495313248
HORVU.MOREX.r3.1HG0085120	1H	495322785	495329045
HORVU.MOREX.r3.1HG0085140	1H	495355314	495358364
HORVU.MOREX.r3.1HG0085150	1H	495409615	495410752
HORVU.MOREX.r3.1HG0085160	1H	495442735	495444115
HORVU.MOREX.r3.1HG0085200	1H	495490297	495490800
HORVU.MOREX.r3.1HG0085210	1H	495496231	495496602
HORVU.MOREX.r3.1HG0085220	1H	495500229	495500789
HORVU.MOREX.r3.1HG0085240	1H	495554261	495560557
HORVU.MOREX.r3.1HG0085260	1H	495567313	495567651
HORVU.MOREX.r3.1HG0085270	1H	495571728	495573664
HORVU.MOREX.r3.1HG0085300	1H	495598201	495604080
HORVU.MOREX.r3.1HG0085320	1H	495630369	495630884
HORVU.MOREX.r3.1HG0085330	1H	495633332	495634064
HORVU.MOREX.r3.1HG0085350	1H	495652329	495653375
HORVU.MOREX.r3.1HG0085380	1H	495673104	495678713
HORVU.MOREX.r3.1HG0085420	1H	495741036	495745600
HORVU.MOREX.r3.1HG0085430	1H	495750793	495752859
HORVU.MOREX.r3.1HG0085440	1H	495780695	495783144
HORVU.MOREX.r3.1HG0085460	1H	495847265	495848359
HORVU.MOREX.r3.1HG0085470	1H	495853418	495855011
HORVU.MOREX.r3.1HG0085480	1H	495887542	495888876
HORVU.MOREX.r3.1HG0085490	1H	495890826	495898192
HORVU.MOREX.r3.1HG0085530	1H	495922857	495926730
HORVU.MOREX.r3.1HG0085570	1H	496021573	496021833
HORVU.MOREX.r3.1HG0085590	1H	496122549	496124474
HORVU.MOREX.r3.1HG0085600	1H	496180571	496181773
HORVU.MOREX.r3.1HG0085640	1H	496275485	496276627
HORVU.MOREX.r3.1HG0085670	1H	496325544	496327246
HORVU.MOREX.r3.1HG0085680	1H	496330230	496349180
HORVU.MOREX.r3.1HG0085700	1H	496355249	496359096
HORVU.MOREX.r3.1HG0085710	1H	496389769	496394496
HORVU.MOREX.r3.1HG0085730	1H	496406615	496407373
HORVU.MOREX.r3.1HG0085740	1H	496422518	496423528
HORVU.MOREX.r3.1HG0085760	1H	496428184	496428948
HORVU.MOREX.r3.1HG0085780	1H	496449105	496452902
HORVU.MOREX.r3.1HG0085810	1H	496503302	496504435
HORVU.MOREX.r3.1HG0085820	1H	496512434	496513198
HORVU.MOREX.r3.1HG0085840	1H	496528135	496530348
HORVU.MOREX.r3.1HG0085870	1H	496538394	496540064
HORVU.MOREX.r3.1HG0085920	1H	496656000	496660230
HORVU.MOREX.r3.1HG0085940	1H	496712120	496712431
HORVU.MOREX.r3.1HG0085950	1H	496742852	496745248
HORVU.MOREX.r3.1HG0085960	1H	496746549	496752559
HORVU.MOREX.r3.1HG0085980	1H	496811001	496812284
HORVU.MOREX.r3.1HG0086000	1H	496868213	496872139
HORVU.MOREX.r3.1HG0086010	1H	496873303	496876327
HORVU.MOREX.r3.1HG0086090	1H	496941817	496949155
HORVU.MOREX.r3.1HG0086100	1H	496949508	496949921
HORVU.MOREX.r3.1HG0086120	1H	496968741	496969478
HORVU.MOREX.r3.1HG0086130	1H	497073997	497078371
HORVU.MOREX.r3.1HG0086140	1H	497112777	497116787
HORVU.MOREX.r3.1HG0086160	1H	497137253	497138623
HORVU.MOREX.r3.1HG0086170	1H	497149685	497151324
HORVU.MOREX.r3.1HG0086250	1H	497209669	497211573
HORVU.MOREX.r3.1HG0086260	1H	497219287	497220328
HORVU.MOREX.r3.1HG0086310	1H	497383786	497384394
HORVU.MOREX.r3.1HG0086330	1H	497406366	497408953
HORVU.MOREX.r3.1HG0086340	1H	497455871	497457355
HORVU.MOREX.r3.1HG0086350	1H	497462459	497466337
HORVU.MOREX.r3.1HG0086360	1H	497466576	497471251
HORVU.MOREX.r3.1HG0086370	1H	497473920	497475794
HORVU.MOREX.r3.1HG0086390	1H	497539305	497541121
HORVU.MOREX.r3.1HG0086410	1H	497614902	497616605
HORVU.MOREX.r3.1HG0086420	1H	497628735	497630474
HORVU.MOREX.r3.1HG0086430	1H	497634262	497648524
HORVU.MOREX.r3.1HG0086450	1H	497690503	497702165
HORVU.MOREX.r3.1HG0086460	1H	497745722	497749874
HORVU.MOREX.r3.1HG0086470	1H	497797569	497802352
HORVU.MOREX.r3.1HG0086530	1H	497831434	497833254
HORVU.MOREX.r3.1HG0086540	1H	497842852	497843720
HORVU.MOREX.r3.1HG0086560	1H	497874715	497881707
HORVU.MOREX.r3.1HG0086570	1H	497889567	497893235
HORVU.MOREX.r3.1HG0086590	1H	497934497	497938575
HORVU.MOREX.r3.1HG0086640	1H	498019327	498020361
HORVU.MOREX.r3.1HG0086670	1H	498040490	498045449
HORVU.MOREX.r3.1HG0086690	1H	498056877	498059184
HORVU.MOREX.r3.1HG0086700	1H	498090278	498091666
HORVU.MOREX.r3.1HG0086720	1H	498234746	498239117
HORVU.MOREX.r3.1HG0086730	1H	498240941	498251217
HORVU.MOREX.r3.1HG0086740	1H	498327840	498329611
HORVU.MOREX.r3.1HG0086790	1H	498348331	498348926
HORVU.MOREX.r3.1HG0086800	1H	498358495	498362471
HORVU.MOREX.r3.1HG0086820	1H	498389207	498392557
HORVU.MOREX.r3.1HG0086840	1H	498424083	498425088
HORVU.MOREX.r3.1HG0086900	1H	498461829	498463021
HORVU.MOREX.r3.1HG0086910	1H	498482806	498484299
HORVU.MOREX.r3.1HG0086920	1H	498523991	498525483
HORVU.MOREX.r3.1HG0086940	1H	498533918	498537446
HORVU.MOREX.r3.1HG0086980	1H	498607300	498607689
HORVU.MOREX.r3.1HG0087000	1H	498687322	498688716
HORVU.MOREX.r3.1HG0087020	1H	498763425	498764620
HORVU.MOREX.r3.1HG0087040	1H	498875352	498876782
HORVU.MOREX.r3.1HG0087050	1H	498892767	498893439
HORVU.MOREX.r3.1HG0087060	1H	498898817	498899095
HORVU.MOREX.r3.1HG0087070	1H	498962403	498963759
HORVU.MOREX.r3.1HG0087100	1H	498967065	498967672
HORVU.MOREX.r3.1HG0087130	1H	498993330	498993929
HORVU.MOREX.r3.1HG0087150	1H	499006879	499010239
HORVU.MOREX.r3.1HG0087170	1H	499022239	499029839
HORVU.MOREX.r3.1HG0087190	1H	499085435	499089233
HORVU.MOREX.r3.1HG0087230	1H	499101042	499101615
HORVU.MOREX.r3.1HG0087250	1H	499120767	499121315
HORVU.MOREX.r3.1HG0087260	1H	499124375	499128514
HORVU.MOREX.r3.1HG0087270	1H	499132589	499133605
HORVU.MOREX.r3.1HG0087290	1H	499170225	499173206
HORVU.MOREX.r3.1HG0087300	1H	499196274	499197854
HORVU.MOREX.r3.1HG0087310	1H	499198786	499200179
HORVU.MOREX.r3.1HG0087320	1H	499206660	499207576
HORVU.MOREX.r3.1HG0087360	1H	499284805	499289646
HORVU.MOREX.r3.1HG0087370	1H	499290543	499290797
HORVU.MOREX.r3.1HG0087380	1H	499291041	499291385
HORVU.MOREX.r3.1HG0087430	1H	499317821	499320445
HORVU.MOREX.r3.1HG0087450	1H	499357605	499370607
HORVU.MOREX.r3.1HG0087480	1H	499478768	499479472
HORVU.MOREX.r3.1HG0087580	1H	499570655	499572076
HORVU.MOREX.r3.1HG0087590	1H	499577938	499578805
HORVU.MOREX.r3.1HG0087600	1H	499608513	499617002
HORVU.MOREX.r3.1HG0087610	1H	499627329	499629826
HORVU.MOREX.r3.1HG0087620	1H	499643940	499645353
HORVU.MOREX.r3.1HG0087660	1H	499826427	499827077
HORVU.MOREX.r3.1HG0087670	1H	499871522	499877341
HORVU.MOREX.r3.1HG0087730	1H	499967846	499968340
HORVU.MOREX.r3.1HG0087740	1H	500003103	500003489
HORVU.MOREX.r3.1HG0087750	1H	500008830	500009615
HORVU.MOREX.r3.1HG0087790	1H	500021497	500024193
HORVU.MOREX.r3.1HG0087800	1H	500033886	500034543
HORVU.MOREX.r3.1HG0087810	1H	500044019	500045560
HORVU.MOREX.r3.1HG0087820	1H	500057570	500058439
HORVU.MOREX.r3.1HG0087840	1H	500140893	500142410
HORVU.MOREX.r3.1HG0087850	1H	500157912	500158481
HORVU.MOREX.r3.1HG0087860	1H	500158809	500159045
HORVU.MOREX.r3.1HG0087880	1H	500171926	500178083
HORVU.MOREX.r3.1HG0087890	1H	500178249	500181341
HORVU.MOREX.r3.1HG0087910	1H	500186573	500186989
HORVU.MOREX.r3.1HG0087940	1H	500232216	500232731
HORVU.MOREX.r3.1HG0087950	1H	500235172	500236359
HORVU.MOREX.r3.1HG0087960	1H	500251655	500254612
HORVU.MOREX.r3.1HG0087980	1H	500272616	500273349
HORVU.MOREX.r3.1HG0087990	1H	500275902	500276659
HORVU.MOREX.r3.1HG0088000	1H	500279144	500281966
HORVU.MOREX.r3.1HG0088020	1H	500341401	500342952
HORVU.MOREX.r3.1HG0088040	1H	500364726	500367974
HORVU.MOREX.r3.1HG0088060	1H	500376690	500379086
HORVU.MOREX.r3.1HG0088070	1H	500381517	500382788
HORVU.MOREX.r3.1HG0088100	1H	500408089	500408412
HORVU.MOREX.r3.1HG0088110	1H	500425484	500428342
HORVU.MOREX.r3.1HG0088140	1H	500458045	500459242
HORVU.MOREX.r3.1HG0088210	1H	500542143	500543053
HORVU.MOREX.r3.1HG0088230	1H	500593230	500594140
HORVU.MOREX.r3.1HG0088250	1H	500644318	500645228
HORVU.MOREX.r3.1HG0088310	1H	500733915	500741212
HORVU.MOREX.r3.1HG0088320	1H	500735897	500737234
HORVU.MOREX.r3.1HG0088330	1H	500741641	500743224
HORVU.MOREX.r3.1HG0088350	1H	500744449	500745213
HORVU.MOREX.r3.1HG0088370	1H	500754633	500756317
HORVU.MOREX.r3.1HG0088400	1H	500791440	500792504
HORVU.MOREX.r3.1HG0088410	1H	500818052	500819260
HORVU.MOREX.r3.1HG0088420	1H	500821107	500821775
HORVU.MOREX.r3.1HG0088440	1H	500836467	500840469
HORVU.MOREX.r3.1HG0088450	1H	500843053	500843565
HORVU.MOREX.r3.1HG0088460	1H	500879347	500880219
HORVU.MOREX.r3.1HG0088480	1H	500919942	500921513
HORVU.MOREX.r3.1HG0088540	1H	500997986	500999128
HORVU.MOREX.r3.1HG0088550	1H	501066955	501067863
HORVU.MOREX.r3.1HG0088560	1H	501084166	501084411
HORVU.MOREX.r3.1HG0088580	1H	501086163	501087920
HORVU.MOREX.r3.1HG0088590	1H	501090442	501093287
HORVU.MOREX.r3.1HG0088600	1H	501102976	501113408
HORVU.MOREX.r3.1HG0088620	1H	501124614	501126039
HORVU.MOREX.r3.1HG0088630	1H	501137401	501138703
HORVU.MOREX.r3.1HG0088650	1H	501142925	501143392
HORVU.MOREX.r3.1HG0088660	1H	501175461	501176561
HORVU.MOREX.r3.1HG0088680	1H	501207565	501210796
HORVU.MOREX.r3.1HG0088690	1H	501211120	501212260
HORVU.MOREX.r3.1HG0088750	1H	501440834	501443187
HORVU.MOREX.r3.1HG0088760	1H	501484533	501487212
HORVU.MOREX.r3.1HG0088770	1H	501505733	501506143
HORVU.MOREX.r3.1HG0088780	1H	501540987	501542404
HORVU.MOREX.r3.1HG0088790	1H	501578933	501581183
HORVU.MOREX.r3.1HG0088840	1H	501602212	501602454
HORVU.MOREX.r3.1HG0088860	1H	501605394	501605609
HORVU.MOREX.r3.1HG0088870	1H	501606090	501608572
HORVU.MOREX.r3.1HG0088890	1H	501684372	501686076
HORVU.MOREX.r3.1HG0088900	1H	501717756	501719380
HORVU.MOREX.r3.1HG0088920	1H	501726472	501728598
HORVU.MOREX.r3.1HG0088930	1H	501801786	501804942
HORVU.MOREX.r3.1HG0088960	1H	501856648	501861240
HORVU.MOREX.r3.1HG0088970	1H	501898052	501898860
HORVU.MOREX.r3.1HG0088990	1H	501912507	501921002
HORVU.MOREX.r3.1HG0089000	1H	501921972	501926548
HORVU.MOREX.r3.1HG0089010	1H	501932408	501935285
HORVU.MOREX.r3.1HG0089030	1H	501995634	501999750
HORVU.MOREX.r3.1HG0089050	1H	502043318	502044547
HORVU.MOREX.r3.1HG0089070	1H	502121357	502125542
HORVU.MOREX.r3.1HG0089120	1H	502502891	502503832
HORVU.MOREX.r3.1HG0089130	1H	502514594	502517638
HORVU.MOREX.r3.1HG0089140	1H	502552327	502554280
HORVU.MOREX.r3.1HG0089160	1H	502615530	502617615
HORVU.MOREX.r3.1HG0089170	1H	502618028	502621339
HORVU.MOREX.r3.1HG0089180	1H	502624017	502626375
HORVU.MOREX.r3.1HG0089190	1H	502630381	502631012
HORVU.MOREX.r3.1HG0089200	1H	502636914	502640822
HORVU.MOREX.r3.1HG0089250	1H	502850598	502851155
HORVU.MOREX.r3.1HG0089330	1H	502944855	502945622
HORVU.MOREX.r3.1HG0089370	1H	503042257	503042930
HORVU.MOREX.r3.1HG0089380	1H	503062951	503063445
HORVU.MOREX.r3.1HG0089390	1H	503240294	503248768
HORVU.MOREX.r3.1HG0089400	1H	503266608	503267852
HORVU.MOREX.r3.1HG0089420	1H	503286276	503287535
HORVU.MOREX.r3.1HG0089440	1H	503321782	503322538
HORVU.MOREX.r3.1HG0089450	1H	503397457	503398870
HORVU.MOREX.r3.1HG0089460	1H	503425301	503430730
HORVU.MOREX.r3.1HG0089480	1H	503466785	503471314
HORVU.MOREX.r3.1HG0089560	1H	503487566	503487922
HORVU.MOREX.r3.1HG0089570	1H	503555578	503557992
HORVU.MOREX.r3.1HG0089580	1H	503558591	503561715
HORVU.MOREX.r3.1HG0089590	1H	503561964	503566681
HORVU.MOREX.r3.1HG0089600	1H	503589523	503589789
HORVU.MOREX.r3.1HG0089620	1H	503602422	503602688
HORVU.MOREX.r3.1HG0089650	1H	503619485	503619751
HORVU.MOREX.r3.1HG0089660	1H	503623909	503624172
HORVU.MOREX.r3.1HG0089690	1H	503636029	503636295
HORVU.MOREX.r3.1HG0089710	1H	503640344	503641535
HORVU.MOREX.r3.1HG0089720	1H	503640857	503641048
HORVU.MOREX.r3.1HG0089730	1H	503641235	503641447
HORVU.MOREX.r3.1HG0089740	1H	503645102	503645365
HORVU.MOREX.r3.1HG0089750	1H	503646669	503647755
HORVU.MOREX.r3.1HG0089760	1H	503693773	503698179
HORVU.MOREX.r3.1HG0089770	1H	503713542	503714950
HORVU.MOREX.r3.1HG0089780	1H	503727123	503728571
HORVU.MOREX.r3.1HG0089800	1H	503854917	503855847
HORVU.MOREX.r3.1HG0089870	1H	503988948	503989583
HORVU.MOREX.r3.1HG0089900	1H	504155100	504157234
HORVU.MOREX.r3.1HG0089920	1H	504186311	504196951
HORVU.MOREX.r3.1HG0089930	1H	504205383	504205876
HORVU.MOREX.r3.1HG0089950	1H	504239389	504243642
HORVU.MOREX.r3.1HG0089970	1H	504296871	504298185
HORVU.MOREX.r3.1HG0089980	1H	504376584	504379022
HORVU.MOREX.r3.1HG0090000	1H	504388043	504388465
HORVU.MOREX.r3.1HG0090010	1H	504420893	504422150
HORVU.MOREX.r3.1HG0090020	1H	504427003	504427350
HORVU.MOREX.r3.1HG0090040	1H	504430949	504431909
HORVU.MOREX.r3.1HG0090060	1H	504486898	504488660
HORVU.MOREX.r3.1HG0090070	1H	504499465	504500523
HORVU.MOREX.r3.1HG0090090	1H	504518505	504518990
HORVU.MOREX.r3.1HG0090100	1H	504524727	504525725
HORVU.MOREX.r3.1HG0090110	1H	504529493	504529753
HORVU.MOREX.r3.1HG0090130	1H	504538441	504539360
HORVU.MOREX.r3.1HG0090140	1H	504548342	504550827
HORVU.MOREX.r3.1HG0090150	1H	504551285	504554791

## Sheet: BSA allVariants
targetRegion.1H_494452003-504575281.allVariants
Chr	Pos	Ref	Alt	Depth_ZHONG8-1	Depth_2HEI	Depth_F2H	Depth_F2B	Index_F2H	Index_F2B	Δindex
1H	494452003	C	T	7,0	0,5	41,0	3,9	1	0.25	0.75
1H	494452035	G	C	5,0	0,5	41,0	5,8	1	0.384615	0.615385
1H	494452053	A	C	6,0	0,5	41,0	4,10	1	0.285714	0.714286
1H	494452071	A	G	5,0	0,5	44,0	5,9	1	0.357143	0.642857
1H	494452440	A	G	7,0	0,5	36,0	8,13	1	0.380952	0.619048
1H	494452952	C	T	7,0	0,7	26,4	8,10	0.866667	0.444444	0.422222
1H	494452971	G	A	7,0	0,8	26,4	4,10	0.866667	0.285714	0.580952
1H	494453001	C	G	10,0	0,5	26,4	4,9	0.866667	0.307692	0.558974
1H	494471769	C	A	8,0	0,9	44,5	11,12	0.897959	0.478261	0.419698
1H	494471772	C	T	8,0	0,9	44,5	11,12	0.897959	0.478261	0.419698
1H	494471797	A	G	8,0	0,8	40,5	10,9	0.888889	0.526316	0.362573
1H	494471821	A	G	8,0	0,9	47,5	9,10	0.903846	0.473684	0.430162
1H	494472029	A	G	8,0	0,13	61,0	3,23	1	0.115385	0.884615
1H	494472031	T	C	8,0	0,13	60,0	3,23	1	0.115385	0.884615
1H	494472324	G	C	7,0	0,8	51,9	5,20	0.85	0.2	0.65
1H	494472351	G	T	6,0	0,10	43,8	8,19	0.843137	0.296296	0.546841
1H	494473056	A	AG	12,0	0,6	45,0	7,25	1	0.21875	0.78125
1H	494473197	T	C	12,0	0,5	46,0	5,23	1	0.178571	0.821429
1H	494473700	G	A	13,0	0,9	48,5	11,27	0.90566	0.289474	0.616187
1H	494473739	C	T	10,0	0,12	49,7	6,22	0.875	0.214286	0.660714
1H	494473913	AGAAAG	A	10,0	0,6	51,0	3,22	1	0.12	0.88
1H	494474064	T	G	7,0	0,9	35,3	4,17	0.921053	0.190476	0.730576
1H	494474100	T	C	8,0	0,9	31,4	4,12	0.885714	0.25	0.635714
1H	494474137	C	T	7,0	0,10	29,3	4,14	0.90625	0.222222	0.684028
1H	494474367	C	A	9,0	0,5	31,4	2,8	0.885714	0.2	0.685714
1H	494474685	G	A	8,0	0,13	34,6	4,18	0.85	0.181818	0.668182
1H	494474819	T	C	9,0	0,10	41,0	4,28	1	0.125	0.875
1H	494474897	G	A	5,0	0,10	31,0	7,24	1	0.225806	0.774194
1H	494475453	G	A	8,0	0,6	48,0	3,21	1	0.125	0.875
1H	494475683	T	A	5,0	0,5	29,0	9,18	1	0.333333	0.666667
1H	494476026	C	T	11,0	0,5	40,8	5,22	0.833333	0.185185	0.648148
1H	494476042	A	G	12,0	0,5	41,6	7,22	0.87234	0.241379	0.630961
1H	494476064	A	G	12,0	0,5	41,4	7,24	0.911111	0.225806	0.685305
1H	494476068	C	A	12,0	0,5	42,4	7,24	0.913043	0.225806	0.687237
1H	494476167	C	T	9,0	0,7	50,6	9,26	0.892857	0.257143	0.635714
1H	494476185	T	C	9,0	0,9	52,7	8,29	0.881356	0.216216	0.66514
1H	494476199	G	C	8,0	0,9	54,8	7,30	0.870968	0.189189	0.681779
1H	494476212	T	C	10,0	0,9	54,8	9,28	0.870968	0.243243	0.627724
1H	494476226	T	G	10,0	0,7	48,8	7,28	0.857143	0.2	0.657143
1H	494476401	A	G	7,0	0,6	44,0	12,19	1	0.387097	0.612903
1H	494476683	T	C	8,0	0,11	53,7	11,18	0.883333	0.37931	0.504023
1H	494476774	A	C	12,0	0,8	61,8	12,19	0.884058	0.387097	0.496961
1H	494476777	G	A	12,0	0,8	62,8	12,19	0.885714	0.387097	0.498618
1H	494476973	C	T	6,0	0,7	54,9	14,19	0.857143	0.424242	0.4329
1H	494477007	A	G	6,0	0,8	47,11	9,17	0.810345	0.346154	0.464191
1H	494477042	CT	C	8,0	0,5	44,12	11,18	0.785714	0.37931	0.406404
1H	494477046	A	C	8,0	0,5	45,12	11,18	0.789474	0.37931	0.410163
1H	494477087	G	A	7,0	0,7	40,11	14,15	0.784314	0.482759	0.301555
1H	494477106	G	T	7,0	0,8	40,12	10,16	0.769231	0.384615	0.384615
1H	494477111	T	C	9,0	0,7	40,12	9,17	0.769231	0.346154	0.423077
1H	494479157	C	G	8,0	0,7	49,7	11,19	0.875	0.366667	0.508333
1H	494481017	G	T	14,0	0,7	51,4	7,13	0.927273	0.35	0.577273
1H	494481350	T	A	7,0	0,5	41,0	5,23	1	0.178571	0.821429
1H	494481359	C	T	8,0	0,5	33,3	7,25	0.916667	0.21875	0.697917
1H	494481389	G	A	8,0	0,6	37,3	7,28	0.925	0.2	0.725
1H	494481391	A	C	8,0	0,6	36,4	7,28	0.9	0.2	0.7
1H	494481398	C	T	8,0	0,6	37,4	8,28	0.902439	0.222222	0.680217
1H	494481415	C	A	11,0	0,8	35,6	9,30	0.853659	0.230769	0.622889
1H	494481434	G	A	12,0	0,8	33,4	7,29	0.891892	0.194444	0.697447
1H	494481447	A	G	12,0	0,8	32,5	7,25	0.864865	0.21875	0.646115
1H	494481705	C	T	9,0	0,6	49,5	9,27	0.907407	0.25	0.657407
1H	494481749	T	A	9,0	0,7	57,0	9,29	1	0.236842	0.763158
1H	494481754	T	C	9,0	0,7	56,0	9,28	1	0.243243	0.756757
1H	494481779	T	G	8,0	0,8	52,0	8,29	1	0.216216	0.783784
1H	494481868	ACAT	A	12,0	0,18	58,0	11,27	1	0.289474	0.710526
1H	494486440	G	T	6,0	0,7	37,0	5,21	1	0.192308	0.807692
1H	494486507	G	A	6,0	0,7	48,0	6,21	1	0.222222	0.777778
1H	494486600	C	G	6,0	0,9	51,6	14,23	0.894737	0.378378	0.516358
1H	494486617	T	G	6,0	0,10	52,5	13,25	0.912281	0.342105	0.570175
1H	494486713	GA	G	8,0	0,10	60,0	9,25	1	0.264706	0.735294
1H	494486783	A	T	7,0	0,15	42,6	13,21	0.875	0.382353	0.492647
1H	494486834	T	C	9,0	0,13	42,8	12,18	0.84	0.4	0.44
1H	494486865	G	A	9,0	0,16	40,9	11,18	0.816327	0.37931	0.437016
1H	494486874	A	G	8,0	0,15	42,9	11,20	0.823529	0.354839	0.468691
1H	494487021	T	C	6,0	0,6	40,0	15,21	1	0.416667	0.583333
1H	494487377	G	A	6,0	0,7	36,7	4,17	0.837209	0.190476	0.646733
1H	494487470	T	C	11,0	0,5	48,0	9,14	1	0.391304	0.608696
1H	494487479	G	T	11,0	0,5	48,0	9,16	1	0.36	0.64
1H	494487584	G	A	11,0	0,6	48,0	6,15	1	0.285714	0.714286
1H	494487653	T	C	8,0	0,5	43,0	7,17	1	0.291667	0.708333
1H	494487937	A	G	6,0	0,6	34,2	6,18	0.944444	0.25	0.694444
1H	494487995	C	T	5,0	0,7	42,0	6,13	1	0.315789	0.684211
1H	494488049	C	G	5,0	0,10	43,0	10,14	1	0.416667	0.583333
1H	494488243	T	C	7,0	0,5	37,0	6,18	1	0.25	0.75
1H	494488244	G	A	7,0	0,5	37,0	6,18	1	0.25	0.75
1H	494488319	C	T	7,0	0,5	40,4	12,15	0.909091	0.444444	0.464646
1H	494488393	G	A	7,0	0,5	42,4	14,13	0.913043	0.518519	0.394525
1H	494488430	G	A	6,0	0,9	41,0	9,13	1	0.409091	0.590909
1H	494488464	G	A	7,0	0,7	39,0	9,12	1	0.428571	0.571429
1H	494488693	A	G	8,0	0,6	44,5	16,12	0.897959	0.571429	0.326531
1H	494489154	A	G	17,0	0,11	72,15	11,25	0.827586	0.305556	0.522031
1H	494489208	C	T	16,0	0,11	64,13	14,25	0.831169	0.358974	0.472194
1H	494489235	C	T	17,0	0,7	63,11	13,24	0.851351	0.351351	0.5
1H	494489625	C	T	8,0	0,13	65,6	12,22	0.915493	0.352941	0.562552
1H	494501848	G	A	6,0	0,5	56,0	9,27	1	0.25	0.75
1H	494501872	TG	T	7,0	0,5	55,0	10,28	1	0.263158	0.736842
1H	494501888	C	G	8,0	0,5	58,0	10,25	1	0.285714	0.714286
1H	494502447	A	AC	7,0	0,5	49,5	7,9	0.907407	0.4375	0.469907
1H	494502449	A	T	7,0	0,6	50,6	7,10	0.892857	0.411765	0.481092
1H	494502458	T	G	7,0	0,6	52,5	7,10	0.912281	0.411765	0.500516
1H	494502516	C	T	11,0	0,7	49,5	6,13	0.907407	0.315789	0.591618
1H	494502641	G	C	6,0	0,7	44,8	6,20	0.846154	0.230769	0.615385
1H	494502818	A	G	7,0	0,5	33,10	10,16	0.767442	0.384615	0.382826
1H	494503104	A	C	10,0	0,7	63,0	8,20	1	0.285714	0.714286
1H	494503106	T	C	10,0	0,7	63,0	8,20	1	0.285714	0.714286
1H	494503121	G	A	10,0	0,7	63,0	8,19	1	0.296296	0.703704
1H	494503153	T	C	10,0	0,7	60,0	7,19	1	0.269231	0.730769
1H	494504090	A	G	5,0	0,8	33,4	8,21	0.891892	0.275862	0.61603
1H	494504112	A	C	10,0	0,7	36,4	7,20	0.9	0.259259	0.640741
1H	494504128	T	C	10,0	0,6	36,5	11,18	0.878049	0.37931	0.498738
1H	494504175	A	C	11,0	0,9	51,0	11,20	1	0.354839	0.645161
1H	494504284	A	T	6,0	0,5	42,0	4,15	1	0.210526	0.789474
1H	494505247	A	T	11,0	0,12	44,5	7,13	0.897959	0.35	0.547959
1H	494505268	T	A	11,0	0,11	41,6	7,18	0.87234	0.28	0.59234
1H	494505285	C	T	10,0	0,10	40,7	7,18	0.851064	0.28	0.571064
1H	494525022	G	A	5,0	0,5	38,0	5,11	1	0.3125	0.6875
1H	494559676	A	AC	0,10	6,0	0,39	28,8	1	0.222222	0.777778
1H	494562367	G	A	0,5	7,0	0,43	7,4	1	0.363636	0.636364
1H	494568760	GC	G	15,0	0,5	45,0	8,11	1	0.421053	0.578947
1H	494570603	G	A	5,0	0,6	33,0	9,15	1	0.375	0.625
1H	494572771	A	G	1,4	9,0	44,6	24,7	0.12	0.225806	-0.105806
1H	494572781	G	C	1,4	8,0	42,6	27,7	0.125	0.205882	-0.0808824
1H	494576162	G	T	6,0	0,5	44,9	8,30	0.830189	0.210526	0.619662
1H	494576401	T	C	8,0	0,6	40,0	6,21	1	0.222222	0.777778
1H	494576834	A	G	12,0	0,9	52,0	10,31	1	0.243902	0.756098
1H	494576943	A	G	13,0	0,13	51,0	13,22	1	0.371429	0.628571
1H	494579850	C	A	11,0	0,6	44,5	13,23	0.897959	0.361111	0.536848
1H	494579970	A	G	14,0	0,5	60,0	10,20	1	0.333333	0.666667
1H	494580579	A	G	7,0	0,7	49,5	16,23	0.907407	0.410256	0.497151
1H	494581886	C	T	12,0	0,18	77,0	4,14	1	0.222222	0.777778
1H	494581999	T	G	9,0	0,20	67,0	4,19	1	0.173913	0.826087
1H	494582007	G	T	12,0	0,18	67,0	4,19	1	0.173913	0.826087
1H	494582146	A	G	20,0	0,12	67,0	11,27	1	0.289474	0.710526
1H	494582167	T	A	13,0	0,12	67,0	10,29	1	0.25641	0.74359
1H	494582173	A	G	13,0	0,12	67,0	10,31	1	0.243902	0.756098
1H	494582204	A	G	16,0	0,9	69,3	9,28	0.958333	0.243243	0.71509
1H	494582239	G	GA	12,0	0,6	56,8	4,19	0.875	0.173913	0.701087
1H	494582961	A	T	12,0	0,17	66,12	17,35	0.846154	0.326923	0.519231
1H	494583188	C	T	9,0	0,7	60,5	16,20	0.923077	0.444444	0.478632
1H	494583295	T	C	6,0	0,9	44,3	13,18	0.93617	0.419355	0.516815
1H	494583335	C	T	5,0	0,5	34,5	9,20	0.871795	0.310345	0.56145
1H	494607540	A	G	9,0	0,6	49,0	13,22	1	0.371429	0.628571
1H	494607643	A	G	10,0	0,5	53,0	12,18	1	0.4	0.6
1H	494607664	A	T	11,0	0,5	54,0	14,17	1	0.451613	0.548387
1H	494607729	C	T	6,0	0,5	54,5	16,20	0.915254	0.444444	0.47081
1H	494608074	T	A	5,0	0,6	53,8	8,24	0.868852	0.25	0.618852
1H	494608297	G	A	8,0	0,14	43,6	2,16	0.877551	0.111111	0.76644
1H	494610291	C	T	16,0	0,14	39,5	7,15	0.886364	0.318182	0.568182
1H	494610434	C	T	10,0	0,10	36,0	10,16	1	0.384615	0.615385
1H	494611094	C	A	6,0	0,6	23,3	4,15	0.884615	0.210526	0.674089
1H	494611539	G	A	9,0	0,7	22,4	4,19	0.846154	0.173913	0.672241
1H	494613129	AG	A	7,0	0,6	17,3	8,9	0.85	0.470588	0.379412
1H	494613195	G	C	6,0	0,9	24,7	6,5	0.774194	0.545455	0.228739
1H	494613750	A	G	5,0	0,10	30,8	9,15	0.789474	0.375	0.414474
1H	494613910	T	G	6,0	0,6	35,0	13,18	1	0.419355	0.580645
1H	494614274	CAT	C	10,0	0,6	86,0	11,22	1	0.333333	0.666667
1H	494614766	T	C	12,0	0,5	35,0	11,14	1	0.44	0.56
1H	494617208	A	G	7,0	0,8	73,0	5,22	1	0.185185	0.814815
1H	494617375	A	T	5,0	0,12	53,5	14,14	0.913793	0.5	0.413793
1H	494617644	A	G	5,0	0,7	31,6	15,31	0.837838	0.326087	0.511751
1H	494617658	C	T	7,0	0,8	33,11	17,37	0.75	0.314815	0.435185
1H	494617679	AT	A	6,0	0,7	32,5	15,35	0.864865	0.3	0.564865
1H	494619045	C	T	5,0	0,7	35,7	10,15	0.833333	0.4	0.433333
1H	494620825	G	A	7,0	0,5	40,0	7,5	1	0.583333	0.416667
1H	494620835	T	C	8,0	0,5	38,0	8,3	1	0.727273	0.272727
1H	494620861	G	A	7,0	0,5	38,0	9,5	1	0.642857	0.357143
1H	494621040	TAC	T	9,0	0,5	42,0	8,6	1	0.571429	0.428571
1H	494634042	T	TAA	5,0	0,10	46,3	6,8	0.938776	0.428571	0.510204
1H	494635141	C	T	5,0	0,5	62,0	8,27	1	0.228571	0.771429
1H	494635153	T	C	5,0	0,7	56,0	9,26	1	0.257143	0.742857
1H	494635171	A	G	6,0	0,7	56,0	9,29	1	0.236842	0.763158
1H	494638385	G	GTATTTTGTCTTTCAATT	6,0	0,5	36,6	9,5	0.857143	0.642857	0.214286
1H	494638394	T	G	7,0	0,6	40,7	9,7	0.851064	0.5625	0.288564
1H	494638417	T	A	9,0	0,7	49,7	7,10	0.875	0.411765	0.463235
1H	494638500	C	T	14,0	0,8	66,4	4,12	0.942857	0.25	0.692857
1H	494638752	T	G	8,0	0,11	67,7	14,23	0.905405	0.378378	0.527027
1H	494638849	C	A	7,0	0,16	72,0	13,15	1	0.464286	0.535714
1H	494638850	ATTTTT	A	8,0	0,16	72,0	13,17	1	0.433333	0.566667
1H	494638855	T	TAAAA	8,0	0,16	72,0	13,17	1	0.433333	0.566667
1H	494639334	T	C	16,0	0,7	52,6	2,18	0.896552	0.1	0.796552
1H	494639454	C	T	8,0	0,7	38,8	7,11	0.826087	0.388889	0.437198
1H	494639464	C	A	9,0	0,7	35,8	7,10	0.813953	0.411765	0.402189
1H	494640000	A	G	5,0	0,6	18,0	6,18	1	0.25	0.75
1H	494640063	A	C	10,0	0,5	31,0	10,20	1	0.333333	0.666667
1H	494640069	C	T	10,0	0,5	33,0	10,20	1	0.333333	0.666667
1H	494640304	T	C	5,0	0,5	57,0	10,26	1	0.277778	0.722222
1H	494640327	A	T	5,0	0,7	60,0	12,24	1	0.333333	0.666667
1H	494640469	A	G	11,0	0,11	41,0	7,22	1	0.241379	0.758621
1H	494640689	T	C	8,0	0,5	53,0	5,21	1	0.192308	0.807692
1H	494641148	T	C	5,0	0,11	26,3	3,15	0.896552	0.166667	0.729885
1H	494641161	G	A	7,0	0,10	25,3	3,15	0.892857	0.166667	0.72619
1H	494641166	C	G	8,0	0,9	27,3	3,15	0.9	0.166667	0.733333
1H	494641665	AG	A	6,0	0,10	52,6	13,22	0.896552	0.371429	0.525123
1H	494641699	G	A	7,0	0,11	51,6	13,27	0.894737	0.325	0.569737
1H	494642838	A	T	6,0	0,7	48,6	5,24	0.888889	0.172414	0.716475
1H	494643129	A	T	7,0	0,5	43,0	13,16	1	0.448276	0.551724
1H	494643130	T	C	7,0	0,5	43,0	13,16	1	0.448276	0.551724
1H	494643134	T	G	7,0	0,5	43,0	13,16	1	0.448276	0.551724
1H	494643394	T	A	7,0	0,11	41,5	10,25	0.891304	0.285714	0.60559
1H	494644413	A	G	15,0	0,6	49,4	12,22	0.924528	0.352941	0.571587
1H	494644434	A	C	17,0	0,7	46,5	11,20	0.901961	0.354839	0.547122
1H	494644497	C	T	14,0	0,9	38,6	11,15	0.863636	0.423077	0.440559
1H	494644553	A	G	7,0	0,5	46,8	6,12	0.851852	0.333333	0.518519
1H	494655027	G	T	11,0	0,9	54,7	19,8	0.885246	0.703704	0.181542
1H	494655033	T	C	11,0	0,10	58,7	21,8	0.892308	0.724138	0.16817
1H	494655481	G	T	14,0	0,5	34,9	4,16	0.790698	0.2	0.590698
1H	494655615	T	G	7,0	0,9	42,6	8,15	0.875	0.347826	0.527174
1H	494655940	A	G	6,0	0,6	42,5	11,21	0.893617	0.34375	0.549867
1H	494656143	C	T	6,0	0,5	38,0	13,15	1	0.464286	0.535714
1H	494656179	A	C	5,0	0,5	33,0	13,21	1	0.382353	0.617647
1H	494656356	T	C	6,0	0,6	42,0	11,17	1	0.392857	0.607143
1H	494656647	G	A	13,0	0,10	67,0	13,16	1	0.448276	0.551724
1H	494656939	A	G	7,0	0,7	76,0	11,15	1	0.423077	0.576923
1H	494656943	G	GA	8,0	0,7	69,0	11,14	1	0.44	0.56
1H	494656970	G	C	8,0	0,6	37,0	10,11	1	0.47619	0.52381
1H	494658767	T	C	5,0	0,6	41,0	8,21	1	0.275862	0.724138
1H	494658769	T	C	5,0	0,6	43,0	8,21	1	0.275862	0.724138
1H	494658788	T	C	5,0	0,8	47,0	6,22	1	0.214286	0.785714
1H	494660270	G	A	6,0	0,5	45,6	9,29	0.882353	0.236842	0.645511
1H	494660275	G	T	7,0	0,5	46,5	9,28	0.901961	0.243243	0.658718
1H	494660364	G	GA	16,0	0,8	63,6	8,19	0.913043	0.296296	0.616747
1H	494660956	G	A	9,0	0,11	51,6	14,23	0.894737	0.378378	0.516358
1H	494660957	A	T	9,0	0,11	51,8	14,23	0.864407	0.378378	0.486028
1H	494661787	T	G	9,0	0,7	43,0	10,22	1	0.3125	0.6875
1H	494661832	C	T	12,0	0,10	43,0	13,19	1	0.40625	0.59375
1H	494661856	A	G	9,0	0,8	43,0	14,19	1	0.424242	0.575758
1H	494661894	C	G	8,0	0,6	43,0	11,19	1	0.366667	0.633333
1H	494662260	A	G	7,0	0,9	51,0	12,18	1	0.4	0.6
1H	494662340	TCAAAAAGCAAGATTTGAA	T	5,0	0,6	45,0	15,16	1	0.483871	0.516129
1H	494662512	A	T	5,0	0,7	40,0	12,19	1	0.387097	0.612903
1H	494662545	CT	C	5,0	0,8	47,0	12,23	1	0.342857	0.657143
1H	494662602	T	C	5,0	0,6	47,0	8,22	1	0.266667	0.733333
1H	494662624	A	AATGGCACAACTACT	5,0	0,6	45,0	7,21	1	0.25	0.75
1H	494664496	C	T	6,0	0,8	33,0	10,17	1	0.37037	0.62963
1H	494664497	G	A	6,0	0,8	33,0	9,17	1	0.346154	0.653846
1H	494664512	A	G	6,0	0,8	34,0	9,21	1	0.3	0.7
1H	494664534	A	G	6,0	0,5	38,0	11,19	1	0.366667	0.633333
1H	494664579	G	A	5,0	0,6	38,0	10,21	1	0.322581	0.677419
1H	494664582	G	A	5,0	0,6	38,0	9,21	1	0.3	0.7
1H	494664583	T	C	5,0	0,6	37,0	9,22	1	0.290323	0.709677
1H	494664823	C	G	6,0	0,5	42,2	9,14	0.954545	0.391304	0.563241
1H	494664836	G	A	8,0	0,7	47,0	9,16	1	0.36	0.64
1H	494664896	G	A	12,0	0,10	50,4	12,18	0.925926	0.4	0.525926
1H	494664904	G	A	13,0	0,10	49,4	13,17	0.924528	0.433333	0.491195
1H	494664910	G	A	13,0	0,8	46,4	13,18	0.92	0.419355	0.500645
1H	494664922	A	G	11,2	0,7	46,4	13,20	0.92	0.393939	0.526061
1H	494664933	T	A	10,2	0,8	42,4	11,19	0.913043	0.366667	0.546377
1H	494664943	C	G	13,0	0,8	43,4	12,23	0.914894	0.342857	0.572036
1H	494664949	C	T	14,0	0,8	42,4	12,22	0.913043	0.352941	0.560102
1H	494664950	G	A	14,0	0,8	42,4	12,21	0.913043	0.363636	0.549407
1H	494664971	A	G	15,0	0,8	39,4	13,22	0.906977	0.371429	0.535548
1H	494664983	A	G	14,0	0,8	36,4	11,20	0.9	0.354839	0.545161
1H	494664984	G	A	14,0	0,7	36,4	12,20	0.9	0.375	0.525
1H	494665003	G	A	10,0	0,8	36,2	12,19	0.947368	0.387097	0.560272
1H	494665026	T	G	8,0	0,7	36,3	12,23	0.923077	0.342857	0.58022
1H	494665115	C	G	5,0	0,9	35,7	13,20	0.833333	0.393939	0.439394
1H	494665127	A	AG	5,0	0,9	37,7	14,24	0.840909	0.368421	0.472488
1H	494666446	G	C	6,0	0,9	43,6	5,20	0.877551	0.2	0.677551
1H	494666450	T	TA	6,0	0,8	42,6	5,18	0.875	0.217391	0.657609
1H	494666513	T	TA	7,0	0,8	50,0	11,18	1	0.37931	0.62069
1H	494666523	T	C	8,0	0,8	52,0	10,16	1	0.384615	0.615385
1H	494666597	G	A	8,0	0,7	58,0	15,18	1	0.454545	0.545455
1H	494666604	T	C	8,0	0,7	59,0	15,17	1	0.46875	0.53125
1H	494666644	C	T	10,0	0,5	50,0	13,14	1	0.481481	0.518519
1H	494666733	T	C	10,0	0,5	45,0	17,18	1	0.485714	0.514286
1H	494666751	T	C	10,0	0,5	45,0	16,17	1	0.484848	0.515152
1H	494666776	A	G	9,0	0,5	46,0	12,15	1	0.444444	0.555556
1H	494667406	CA	C	8,0	0,5	40,0	4,10	1	0.285714	0.714286
1H	494667444	T	G	8,0	0,5	38,0	7,11	1	0.388889	0.611111
1H	494669676	A	T	6,0	0,14	25,4	10,14	0.862069	0.416667	0.445402
1H	494669686	C	T	5,0	0,14	27,5	11,15	0.84375	0.423077	0.420673
1H	494669696	A	C	6,0	0,15	28,6	12,14	0.823529	0.461538	0.361991
1H	494670348	CA	C	12,0	0,8	29,5	7,19	0.852941	0.269231	0.58371
1H	494670897	G	A	7,0	0,13	56,6	19,28	0.903226	0.404255	0.49897
1H	494670920	A	T	7,0	0,13	56,6	18,24	0.903226	0.428571	0.474654
1H	494670987	TG	T	6,0	0,8	67,5	12,20	0.930556	0.375	0.555556
1H	494671145	T	C	11,0	0,16	67,0	16,25	1	0.390244	0.609756
1H	494671230	A	G	7,0	0,9	57,6	11,26	0.904762	0.297297	0.607465
1H	494671311	A	G	10,0	0,6	51,8	14,21	0.864407	0.4	0.464407
1H	494671369	A	T	10,0	0,5	40,6	12,22	0.869565	0.352941	0.516624
1H	494671374	C	T	10,0	0,6	40,6	11,22	0.869565	0.333333	0.536232
1H	494671522	T	C	5,0	0,7	36,0	6,13	1	0.315789	0.684211
1H	494671702	C	G	15,0	0,13	59,0	12,16	1	0.428571	0.571429
1H	494671951	A	G	11,0	1,7	45,0	9,11	1	0.45	0.55
1H	494672090	G	A	7,0	0,11	31,4	7,16	0.885714	0.304348	0.581366
1H	494672101	C	T	9,0	0,11	32,4	6,18	0.888889	0.25	0.638889
1H	494672128	G	A	6,0	0,12	33,2	8,16	0.942857	0.333333	0.609524
1H	494672160	T	C	7,0	0,10	33,1	6,7	0.970588	0.461538	0.50905
1H	494672172	C	G	7,0	0,9	33,1	6,8	0.970588	0.428571	0.542017
1H	494673511	A	G	12,0	0,11	35,4	16,21	0.897436	0.432432	0.465003
1H	494673661	A	G	8,0	0,7	60,0	6,15	1	0.285714	0.714286
1H	494673734	T	C	7,0	0,8	51,4	7,23	0.927273	0.233333	0.693939
1H	494673756	C	T	8,0	0,9	49,4	8,23	0.924528	0.258065	0.666464
1H	494674123	A	G	5,0	0,8	38,0	11,25	1	0.305556	0.694444
1H	494674475	T	C	8,0	0,12	46,0	7,15	1	0.318182	0.681818
1H	494677617	G	A	10,0	0,5	42,9	5,16	0.823529	0.238095	0.585434
1H	494677840	A	G	6,0	0,10	47,4	8,14	0.921569	0.363636	0.557932
1H	494677934	G	A	5,0	0,7	57,0	4,14	1	0.222222	0.777778
1H	494677949	G	A	5,0	0,7	54,0	4,14	1	0.222222	0.777778
1H	494677980	A	G	6,0	0,6	58,0	3,13	1	0.1875	0.8125
1H	494677983	C	T	6,0	0,6	58,0	3,13	1	0.1875	0.8125
1H	494678902	G	C	5,0	0,5	64,0	5,18	1	0.217391	0.782609
1H	494679137	T	A	10,0	0,8	40,5	12,11	0.888889	0.521739	0.36715
1H	494679370	T	TATTATTATTA	13,0	0,6	41,0	9,18	1	0.333333	0.666667
1H	494679539	C	T	10,0	0,7	40,5	3,18	0.888889	0.142857	0.746032
1H	494679578	C	T	8,0	0,6	39,4	2,18	0.906977	0.1	0.806977
1H	494679606	G	A	5,0	0,8	37,5	3,18	0.880952	0.142857	0.738095
1H	494679658	AT	A	5,0	0,10	47,0	11,24	1	0.314286	0.685714
1H	494679779	A	T	8,0	0,9	55,6	11,21	0.901639	0.34375	0.557889
1H	494679916	TG	T	15,0	0,12	60,7	12,20	0.895522	0.375	0.520522
1H	494680030	A	C	16,0	0,13	69,8	13,22	0.896104	0.371429	0.524675
1H	494680036	A	AT	15,0	0,13	74,8	12,23	0.902439	0.342857	0.559582
1H	494680084	A	T	10,0	0,10	76,9	11,16	0.894118	0.407407	0.48671
1H	494680093	G	C	11,0	0,9	81,9	9,17	0.9	0.346154	0.553846
1H	494680108	A	G	11,0	0,9	79,8	10,18	0.908046	0.357143	0.550903
1H	494680136	A	G	7,0	0,5	80,7	12,22	0.91954	0.352941	0.566599
1H	494680201	A	C	8,0	0,7	68,7	8,26	0.906667	0.235294	0.671373
1H	494680303	C	G	11,0	0,16	68,9	6,21	0.883117	0.222222	0.660895
1H	494680360	A	C	9,0	0,13	77,7	13,22	0.916667	0.371429	0.545238
1H	494680574	T	A	17,0	0,10	62,5	13,27	0.925373	0.325	0.600373
1H	494681375	A	C	7,0	0,5	28,5	6,12	0.848485	0.333333	0.515152
1H	494682234	CTG	C	5,0	0,7	26,5	8,18	0.83871	0.307692	0.531017
1H	494682240	T	C	5,0	0,7	28,6	8,16	0.823529	0.333333	0.490196
1H	494682398	T	C	5,0	0,7	49,5	11,21	0.907407	0.34375	0.563657
1H	494682401	C	T	5,0	0,7	49,5	12,20	0.907407	0.375	0.532407
1H	494682429	C	T	5,0	0,7	45,4	14,18	0.918367	0.4375	0.480867
1H	494683198	C	T	8,0	0,6	45,0	9,19	1	0.321429	0.678571
1H	494683211	T	G	9,0	0,5	45,0	9,20	1	0.310345	0.689655
1H	494683385	A	G	10,0	0,6	52,0	8,15	1	0.347826	0.652174
1H	494684005	T	C	6,0	0,9	34,9	12,20	0.790698	0.375	0.415698
1H	494684556	A	G	12,0	0,8	46,9	6,26	0.836364	0.1875	0.648864
1H	494684837	T	A	12,0	0,8	38,4	16,25	0.904762	0.390244	0.514518
1H	494684896	G	A	10,0	0,10	44,9	16,24	0.830189	0.4	0.430189
1H	494684997	T	C	6,0	0,6	54,17	9,17	0.760563	0.346154	0.41441
1H	494685900	C	T	17,0	0,5	34,0	11,38	1	0.22449	0.77551
1H	494685920	C	T	15,0	0,5	30,0	12,38	1	0.24	0.76
1H	494685938	T	C	12,0	0,5	32,0	12,29	1	0.292683	0.707317
1H	494687032	C	A	6,0	0,5	47,5	7,28	0.903846	0.2	0.703846
1H	494688441	G	C	10,0	0,7	68,0	11,27	1	0.289474	0.710526
1H	494688629	G	T	5,0	0,6	42,10	4,29	0.807692	0.121212	0.68648
1H	494691216	A	G	7,0	0,7	65,6	6,24	0.915493	0.2	0.715493
1H	494691229	A	C	10,0	0,8	65,7	6,24	0.902778	0.2	0.702778
1H	494691528	C	T	5,0	0,6	51,8	12,19	0.864407	0.387097	0.47731
1H	494691933	G	GT	5,0	0,6	66,0	5,34	1	0.128205	0.871795
1H	494692606	G	A	17,0	0,6	68,9	22,20	0.883117	0.52381	0.359307
1H	494692764	G	A	17,0	1,5	79,4	13,19	0.951807	0.40625	0.545557
1H	494693307	C	T	13,0	0,6	42,0	15,8	1	0.652174	0.347826
1H	494693520	C	T	24,0	0,15	93,17	34,30	0.845455	0.53125	0.314205
1H	494693800	AG	A	2,8	6,0	10,63	38,3	0.863014	0.0731707	0.789843
1H	494694117	C	A	9,0	0,6	81,0	18,27	1	0.4	0.6
1H	494694856	A	G	19,0	2,14	121,0	25,27	1	0.480769	0.519231
1H	494695153	A	G	13,0	2,8	54,6	23,25	0.9	0.479167	0.420833
1H	494695794	G	C	7,0	0,8	57,0	9,23	1	0.28125	0.71875
1H	494695826	G	T	6,0	0,6	63,0	10,21	1	0.322581	0.677419
1H	494695856	T	A	6,0	0,7	60,0	12,18	1	0.4	0.6
1H	494695868	T	C	5,0	0,6	63,0	12,20	1	0.375	0.625
1H	494696010	G	A	9,0	0,5	54,0	10,31	1	0.243902	0.756098
1H	494696202	T	C	13,0	0,5	43,8	13,50	0.843137	0.206349	0.636788
1H	494696376	A	G	9,0	0,5	78,8	31,33	0.906977	0.484375	0.422602
1H	494696382	AC	A	9,0	0,5	63,22	19,43	0.741176	0.306452	0.434725
1H	494696481	C	T	6,0	0,11	105,0	32,21	1	0.603774	0.396226
1H	494696722	AC	A	13,0	0,7	73,0	17,22	1	0.435897	0.564103
1H	494696841	CAAAAAG	C	11,0	0,6	72,4	18,21	0.947368	0.461538	0.48583
1H	494696850	A	ATTTTTT	11,0	0,6	71,4	18,21	0.946667	0.461538	0.485128
1H	494697018	C	T	12,0	0,8	51,5	14,13	0.910714	0.518519	0.392196
1H	494697196	G	T	11,0	0,13	48,13	16,15	0.786885	0.516129	0.270756
1H	494697224	A	G	10,0	0,10	51,13	16,19	0.796875	0.457143	0.339732
1H	494697243	G	A	8,0	0,10	47,11	17,20	0.810345	0.459459	0.350885
1H	494697249	G	A	9,0	0,8	50,11	16,20	0.819672	0.444444	0.375228
1H	494697264	C	G	6,0	0,8	46,10	16,20	0.821429	0.444444	0.376984
1H	494697270	C	A	6,0	0,6	46,10	15,21	0.821429	0.416667	0.404762
1H	494697570	A	T	0,7	8,0	8,45	31,17	0.849057	0.354167	0.49489
1H	494697674	A	T	6,0	0,9	53,6	10,19	0.898305	0.344828	0.553477
1H	494697680	A	C	7,0	0,8	59,8	11,18	0.880597	0.37931	0.501287
1H	494697736	A	C	5,0	0,8	62,9	14,26	0.873239	0.35	0.523239
1H	494697752	G	A	5,0	0,7	68,4	17,21	0.944444	0.447368	0.497076
1H	494697770	C	G	6,0	0,6	67,2	13,18	0.971014	0.419355	0.55166
1H	494698220	T	C	7,0	0,7	65,0	13,24	1	0.351351	0.648649
1H	494698257	A	T	7,0	0,6	54,3	12,23	0.947368	0.342857	0.604511
1H	494698753	T	G	14,0	0,11	43,6	10,20	0.877551	0.333333	0.544218
1H	494699431	T	A	7,0	0,10	39,0	8,12	1	0.4	0.6
1H	494699523	A	G	13,0	0,9	35,0	5,14	1	0.263158	0.736842
1H	494699538	C	T	13,0	0,9	37,0	6,17	1	0.26087	0.73913
1H	494699760	A	C	7,0	0,9	55,0	7,27	1	0.205882	0.794118
1H	494700693	G	A	5,0	0,8	37,0	10,15	1	0.4	0.6
1H	494700695	T	C	5,0	0,8	37,0	10,15	1	0.4	0.6
1H	494700832	C	G	9,0	0,8	47,7	11,15	0.87037	0.423077	0.447293
1H	494700934	C	T	13,0	0,5	65,0	8,21	1	0.275862	0.724138
1H	494701806	G	A	5,0	0,7	38,3	9,19	0.926829	0.321429	0.605401
1H	494703143	G	A	6,0	0,5	26,6	4,9	0.8125	0.307692	0.504808
1H	494703180	G	C	6,0	0,9	27,7	5,8	0.794118	0.384615	0.409502
1H	494703228	T	G	5,0	0,9	27,7	6,7	0.794118	0.461538	0.332579
1H	494704321	T	G	7,0	0,7	36,4	9,23	0.9	0.28125	0.61875
1H	494704483	T	A	5,0	2,10	49,7	6,20	0.875	0.230769	0.644231
1H	494704889	C	T	8,0	0,7	31,0	3,13	1	0.1875	0.8125
1H	494706761	C	T	10,0	2,8	36,7	13,14	0.837209	0.481481	0.355728
1H	494706765	C	T	10,0	2,8	36,7	13,15	0.837209	0.464286	0.372924
1H	494706910	A	G	9,0	0,7	56,4	13,19	0.933333	0.40625	0.527083
1H	494706965	T	G	12,0	0,6	54,7	15,17	0.885246	0.46875	0.416496
1H	494706978	T	C	11,0	0,5	53,5	11,18	0.913793	0.37931	0.534483
1H	494710891	T	C	8,0	0,6	66,19	16,8	0.776471	0.666667	0.109804
1H	494710911	G	T	10,0	0,5	43,35	9,9	0.551282	0.5	0.0512821
1H	494714278	T	A	12,0	1,7	61,31	8,8	0.663043	0.5	0.163043
1H	494716709	C	A	8,0	0,5	30,7	3,14	0.810811	0.176471	0.63434
1H	494717477	T	G	7,0	0,7	58,6	11,24	0.90625	0.314286	0.591964
1H	494717524	C	T	0,7	9,0	6,58	32,10	0.90625	0.238095	0.668155
1H	494717538	C	G	7,0	0,9	53,6	11,34	0.898305	0.244444	0.653861
1H	494717558	C	T	8,0	0,10	54,6	12,31	0.9	0.27907	0.62093
1H	494717947	T	C	16,0	0,6	52,0	8,18	1	0.307692	0.692308
1H	494718281	G	A	5,0	0,10	37,6	3,20	0.860465	0.130435	0.73003
1H	494719764	C	T	6,0	0,5	38,0	15,21	1	0.416667	0.583333
1H	494719891	T	C	8,0	0,5	42,6	18,16	0.875	0.529412	0.345588
1H	494721177	C	T	5,0	0,6	43,0	10,33	1	0.232558	0.767442
1H	494721293	A	G	7,0	0,5	43,0	12,31	1	0.27907	0.72093
1H	494721600	T	C	12,0	0,8	45,0	8,22	1	0.266667	0.733333
1H	494723048	C	T	6,0	0,8	24,4	4,13	0.857143	0.235294	0.621849
1H	494723901	C	A	12,0	0,8	36,6	5,24	0.857143	0.172414	0.684729
1H	494723902	GT	G	12,0	0,8	35,6	5,24	0.853659	0.172414	0.681245
1H	494723939	A	T	16,0	0,5	34,7	4,22	0.829268	0.153846	0.675422
1H	494724190	G	C	12,0	0,9	59,0	8,22	1	0.266667	0.733333
1H	494724213	C	T	11,0	0,12	59,0	5,22	1	0.185185	0.814815
1H	494724227	T	C	10,0	0,13	52,0	7,21	1	0.25	0.75
1H	494724672	T	G	12,0	0,6	70,8	6,25	0.897436	0.193548	0.703888
1H	494724905	G	A	11,0	0,8	52,7	10,19	0.881356	0.344828	0.536528
1H	494724919	A	T	8,0	0,9	53,8	10,19	0.868852	0.344828	0.524025
1H	494724927	G	GA	9,0	0,12	54,9	12,18	0.857143	0.4	0.457143
1H	494724962	G	C	11,0	0,13	56,9	10,19	0.861538	0.344828	0.516711
1H	494724968	T	TA	11,0	0,13	59,10	10,19	0.855072	0.344828	0.510245
1H	494725050	G	T	11,0	1,7	66,0	9,19	1	0.321429	0.678571
1H	494725790	CA	C	6,0	0,9	45,7	9,15	0.865385	0.375	0.490385
1H	494725940	C	G	7,0	0,12	23,3	8,15	0.884615	0.347826	0.536789
1H	494726548	C	T	5,0	0,7	15,2	3,8	0.882353	0.272727	0.609626
1H	494726804	C	G	6,0	0,7	24,0	5,10	1	0.333333	0.666667
1H	494726834	A	G	6,0	0,6	27,0	6,11	1	0.352941	0.647059
1H	494726945	TTGTATCCCA	T	5,0	0,5	49,0	10,16	1	0.384615	0.615385
1H	494726964	T	C	9,0	0,5	46,2	9,17	0.958333	0.346154	0.612179
1H	494727009	T	G	12,0	0,8	59,5	12,17	0.921875	0.413793	0.508082
1H	494727078	A	G	17,0	0,11	89,0	9,24	1	0.272727	0.727273
1H	494728769	T	G	6,0	0,7	48,0	8,17	1	0.32	0.68
1H	494728788	C	G	6,0	0,9	53,0	11,22	1	0.333333	0.666667
1H	494728871	A	C	6,0	1,7	67,0	7,23	1	0.233333	0.766667
1H	494729123	C	T	5,0	0,7	40,4	8,25	0.909091	0.242424	0.666667
1H	494729289	C	T	8,0	0,8	39,5	11,15	0.886364	0.423077	0.463287
1H	494729304	G	T	9,0	0,8	43,5	11,14	0.895833	0.44	0.455833
1H	494729337	G	A	11,0	0,6	51,3	12,22	0.944444	0.352941	0.591503
1H	494729364	C	T	14,0	0,6	52,0	15,22	1	0.405405	0.594595
1H	494729467	A	G	5,0	0,5	63,0	11,25	1	0.305556	0.694444
1H	494732061	T	C	12,0	0,5	52,0	9,12	1	0.428571	0.571429
1H	494732108	CA	C	16,0	0,5	54,0	10,15	1	0.4	0.6
1H	494732121	G	A	14,0	0,5	53,0	10,14	1	0.416667	0.583333
1H	494732193	C	G	10,0	0,5	45,0	8,11	1	0.421053	0.578947
1H	494732200	A	T	10,0	0,5	49,0	7,11	1	0.388889	0.611111
1H	494732462	T	C	5,0	0,6	67,0	5,20	1	0.2	0.8
1H	494732788	A	C	8,0	0,8	49,5	5,15	0.907407	0.25	0.657407
1H	494732790	A	G	8,0	0,7	47,5	5,15	0.903846	0.25	0.653846
1H	494732828	A	G	8,0	0,8	45,4	4,17	0.918367	0.190476	0.727891
1H	494732845	A	C	7,0	0,9	47,3	4,15	0.94	0.210526	0.729474
1H	494733266	A	G	7,0	0,6	59,6	5,14	0.907692	0.263158	0.644534
1H	494733402	AT	A	15,0	0,8	60,5	4,12	0.923077	0.25	0.673077
1H	494733404	A	C	15,0	0,8	60,5	4,12	0.923077	0.25	0.673077
1H	494733491	C	T	19,0	0,8	79,0	6,11	1	0.352941	0.647059
1H	494733496	C	T	19,0	0,7	79,0	6,11	1	0.352941	0.647059
1H	494734063	G	A	8,0	0,7	33,4	8,25	0.891892	0.242424	0.649468
1H	494734075	A	G	9,0	0,7	34,4	8,24	0.894737	0.25	0.644737
1H	494734220	A	T	9,0	0,13	54,0	4,13	1	0.235294	0.764706
1H	494734228	A	T	9,0	0,13	59,0	3,14	1	0.176471	0.823529
1H	494734233	A	T	9,0	0,14	57,0	4,12	1	0.25	0.75
1H	494734238	G	T	10,0	0,14	60,0	5,13	1	0.277778	0.722222
1H	494734385	A	G	5,0	0,5	41,1	13,12	0.97619	0.52	0.45619
1H	494734572	C	T	6,0	0,6	33,10	7,15	0.767442	0.318182	0.44926
1H	494734597	T	C	5,0	0,5	34,7	7,14	0.829268	0.333333	0.495935
1H	494734630	C	T	7,0	0,9	40,5	6,15	0.888889	0.285714	0.603175
1H	494734754	A	G	7,0	0,5	36,4	8,6	0.9	0.571429	0.328571
1H	494734758	A	G	7,0	0,5	36,4	8,6	0.9	0.571429	0.328571
1H	494734759	TG	T	7,0	0,5	37,4	8,6	0.902439	0.571429	0.33101
1H	494734791	TC	T	5,0	0,6	39,3	8,10	0.928571	0.444444	0.484127
1H	494735029	T	C	11,0	0,5	65,0	7,24	1	0.225806	0.774194
1H	494735032	A	G	10,0	0,5	61,0	7,24	1	0.225806	0.774194
1H	494735108	A	T	6,0	0,5	45,3	3,17	0.9375	0.15	0.7875
1H	494735402	G	A	5,0	0,5	44,8	9,11	0.846154	0.45	0.396154
1H	494735409	A	G	5,0	0,5	43,8	8,12	0.843137	0.4	0.443137
1H	494735421	C	A	8,0	0,5	44,8	8,13	0.846154	0.380952	0.465201
1H	494735443	T	C	9,0	0,5	38,8	8,14	0.826087	0.363636	0.462451
1H	494735465	G	C	9,0	0,5	41,6	7,17	0.87234	0.291667	0.580674
1H	494736742	CA	C	10,0	0,6	54,0	8,22	1	0.266667	0.733333
1H	494736768	C	T	9,0	0,6	43,0	7,24	1	0.225806	0.774194
1H	494737473	TTC	T	11,0	0,10	40,0	9,25	1	0.264706	0.735294
1H	494737651	G	C	14,0	0,7	48,5	15,24	0.90566	0.384615	0.521045
1H	494738057	G	T	12,0	0,10	45,0	10,26	1	0.277778	0.722222
1H	494738580	G	A	6,0	0,11	25,10	7,16	0.714286	0.304348	0.409938
1H	494738589	AG	A	6,0	0,10	26,10	8,19	0.722222	0.296296	0.425926
1H	494738819	TCTGCACTGGG	T	9,0	0,10	32,0	15,29	1	0.340909	0.659091
1H	494738921	C	T	9,0	0,9	33,0	10,16	1	0.384615	0.615385
1H	494739045	T	TCAAATAGTTAGTATAACTA	10,0	0,7	43,0	14,27	1	0.341463	0.658537
1H	494739389	T	C	10,0	0,8	50,8	10,20	0.862069	0.333333	0.528736
1H	494763072	C	A	5,0	0,5	10,0	5,10	1	0.333333	0.666667
1H	494763086	G	A	5,0	0,5	10,0	5,12	1	0.294118	0.705882
1H	494763088	G	GC	5,0	0,5	10,0	5,12	1	0.294118	0.705882
1H	494763092	G	A	5,0	0,5	10,0	5,11	1	0.3125	0.6875
1H	494778307	A	C	6,0	0,6	59,0	10,14	1	0.416667	0.583333
1H	494778348	A	T	8,0	0,5	49,0	7,14	1	0.333333	0.666667
1H	494778461	C	G	8,0	0,8	61,5	13,12	0.924242	0.52	0.404242
1H	494778585	C	G	6,0	0,5	72,8	6,21	0.9	0.222222	0.677778
1H	494778835	G	A	7,0	0,12	38,5	6,23	0.883721	0.206897	0.676824
1H	494778885	CA	C	8,0	0,8	38,7	7,22	0.844444	0.241379	0.603065
1H	494779771	AGGCTCGAGT	A	5,0	0,5	34,3	4,6	0.918919	0.4	0.518919
1H	494780811	A	G	1,5	9,0	30,11	15,2	0.268293	0.117647	0.150646
1H	494781106	A	C	0,7	5,0	36,18	19,15	0.333333	0.441176	-0.107843
1H	494781134	G	T	8,0	0,5	55,0	20,14	1	0.588235	0.411765
1H	494781478	T	A	26,0	0,7	102,0	33,29	1	0.532258	0.467742
1H	494782629	C	T	25,0	0,8	86,0	23,16	1	0.589744	0.410256
1H	494783234	C	T	13,0	0,8	113,0	57,21	1	0.730769	0.269231
1H	494783806	T	C	5,0	0,8	17,6	5,19	0.73913	0.208333	0.530797
1H	494783816	G	A	7,0	0,7	16,4	6,20	0.8	0.230769	0.569231
1H	494783910	C	CA	6,0	0,5	16,3	7,21	0.842105	0.25	0.592105
1H	494783921	A	G	6,0	0,5	17,3	8,20	0.85	0.285714	0.564286
1H	494785149	G	T	8,0	0,6	48,0	8,17	1	0.32	0.68
1H	494785150	G	T	8,0	0,6	49,0	9,17	1	0.346154	0.653846
1H	494786130	T	G	10,0	0,7	40,0	4,24	1	0.142857	0.857143
1H	494786274	C	T	7,0	0,7	25,3	6,18	0.892857	0.25	0.642857
1H	494786397	T	C	5,0	0,7	44,0	15,23	1	0.394737	0.605263
1H	494796063	C	A	5,0	0,9	55,6	10,14	0.901639	0.416667	0.484973
1H	494796315	C	A	10,0	0,6	49,0	6,27	1	0.181818	0.818182
1H	494796322	A	T	9,0	0,6	50,0	6,25	1	0.193548	0.806452
1H	494796530	T	C	16,0	0,7	33,0	10,29	1	0.25641	0.74359
1H	494797115	A	G	7,0	0,8	64,0	12,29	1	0.292683	0.707317
1H	494797128	G	C	8,0	0,9	65,0	12,32	1	0.272727	0.727273
1H	494797129	A	G	9,0	0,9	64,0	12,31	1	0.27907	0.72093
1H	494797174	A	G	7,0	0,9	52,0	13,31	1	0.295455	0.704545
1H	494797226	A	G	5,0	0,8	41,0	8,27	1	0.228571	0.771429
1H	494797302	T	G	5,0	0,6	28,4	9,22	0.875	0.290323	0.584677
1H	494797306	C	T	5,0	0,6	29,4	8,23	0.878788	0.258065	0.620723
1H	494798824	T	C	5,0	0,6	54,0	14,21	1	0.4	0.6
1H	494798838	C	T	5,0	0,5	52,0	13,21	1	0.382353	0.617647
1H	494799818	C	G	7,0	0,6	48,0	3,20	1	0.130435	0.869565
1H	494799823	C	A	6,0	0,6	48,0	3,22	1	0.12	0.88
1H	494799837	C	T	6,0	0,6	44,0	2,22	1	0.0833333	0.916667
1H	494800230	T	C	6,0	0,6	27,0	12,13	1	0.48	0.52
1H	494804260	A	G	9,0	0,7	46,0	5,8	1	0.384615	0.615385
1H	494810254	G	C	8,0	0,6	41,0	3,13	1	0.1875	0.8125
1H	494813286	G	C	14,0	0,6	75,0	21,16	1	0.567568	0.432432
1H	494813483	A	T	17,0	0,8	49,0	7,9	1	0.4375	0.5625
1H	494813824	A	T	12,0	0,9	67,0	11,14	1	0.44	0.56
1H	494813826	A	C	12,0	0,9	65,0	10,14	1	0.416667	0.583333
1H	494813854	T	A	14,0	0,10	62,2	9,15	0.96875	0.375	0.59375
1H	494813890	A	ATT	0,14	14,0	2,50	14,10	0.961538	0.416667	0.544872
1H	494813903	T	C	13,0	0,15	49,2	10,14	0.960784	0.416667	0.544118
1H	494813984	C	T	14,0	0,11	42,7	10,16	0.857143	0.384615	0.472527
1H	494814017	A	G	13,0	0,10	52,6	10,19	0.896552	0.344828	0.551724
1H	494814024	T	C	11,0	0,9	54,6	10,18	0.9	0.357143	0.542857
1H	494814118	A	G	11,0	0,13	58,0	7,21	1	0.25	0.75
1H	494814194	T	C	7,0	0,8	45,4	5,22	0.918367	0.185185	0.733182
1H	494814213	T	C	9,0	0,7	48,3	7,23	0.941176	0.233333	0.707843
1H	494814229	A	AT	9,0	0,8	41,2	7,25	0.953488	0.21875	0.734738
1H	494814249	C	T	8,0	0,6	47,3	6,26	0.94	0.1875	0.7525
1H	494814566	AT	A	13,0	0,7	53,0	8,18	1	0.307692	0.692308
1H	494814588	G	A	11,0	0,8	54,0	10,21	1	0.322581	0.677419
1H	494814640	TA	T	14,0	0,9	50,0	5,19	1	0.208333	0.791667
1H	494814843	GC	G	9,0	0,16	59,9	4,23	0.867647	0.148148	0.719499
1H	494814962	T	C	10,0	0,8	37,6	4,13	0.860465	0.235294	0.625171
1H	494814998	C	T	5,0	0,6	36,7	5,9	0.837209	0.357143	0.480066
1H	494815004	T	C	5,0	0,6	37,6	5,8	0.860465	0.384615	0.47585
1H	494815214	T	C	8,0	0,5	24,0	5,15	1	0.25	0.75
1H	494815698	C	A	10,0	0,7	54,4	14,25	0.931034	0.358974	0.57206
1H	494816184	G	A	14,0	0,5	49,0	9,25	1	0.264706	0.735294
1H	494816190	A	G	15,0	0,5	49,0	9,22	1	0.290323	0.709677
1H	494816823	A	G	7,0	0,8	41,0	7,21	1	0.25	0.75
1H	494817015	C	T	6,0	0,7	40,5	3,15	0.888889	0.166667	0.722222
1H	494817037	G	C	6,0	0,6	37,5	4,16	0.880952	0.2	0.680952
1H	494817048	C	T	7,0	0,6	34,5	4,17	0.871795	0.190476	0.681319
1H	494817052	A	G	7,0	0,6	36,4	4,16	0.9	0.2	0.7
1H	494817300	A	G	5,0	0,6	24,5	7,6	0.827586	0.538462	0.289125
1H	494817344	T	C	7,0	0,6	28,3	8,9	0.903226	0.470588	0.432638
1H	494818043	T	C	12,0	0,11	51,4	12,18	0.927273	0.4	0.527273
1H	494818048	C	A	12,0	0,11	51,4	12,18	0.927273	0.4	0.527273
1H	494818094	C	T	11,0	0,14	41,4	11,15	0.911111	0.423077	0.488034
1H	494818113	C	T	8,0	0,12	40,5	12,15	0.888889	0.444444	0.444444
1H	494827398	G	T	7,0	0,7	31,5	13,8	0.861111	0.619048	0.242063
1H	494827409	G	T	5,0	0,7	33,5	14,8	0.868421	0.636364	0.232057
1H	494829056	C	T	5,0	0,8	35,0	3,24	1	0.111111	0.888889
1H	494829146	G	A	6,0	0,6	38,4	6,19	0.904762	0.24	0.664762
1H	494829186	A	C	6,0	0,7	52,5	6,16	0.912281	0.272727	0.639553
1H	494829228	G	A	6,0	0,6	50,5	6,21	0.909091	0.222222	0.686869
1H	494829336	T	C	8,0	0,6	48,4	8,27	0.923077	0.228571	0.694505
1H	494829361	A	G	9,0	0,6	49,5	9,27	0.907407	0.25	0.657407
1H	494829534	T	C	10,0	0,10	39,3	8,26	0.928571	0.235294	0.693277
1H	494829658	C	T	11,2	0,6	40,9	9,37	0.816327	0.195652	0.620674
1H	494829843	C	T	6,0	0,12	50,0	10,16	1	0.384615	0.615385
1H	494829849	C	A	6,0	0,11	50,0	10,15	1	0.4	0.6
1H	494830365	A	G	7,0	0,10	37,5	11,17	0.880952	0.392857	0.488095
1H	494830755	G	A	0,10	5,0	1,33	22,9	0.970588	0.290323	0.680266
1H	494831039	C	T	13,0	0,5	36,0	8,33	1	0.195122	0.804878
1H	494831051	G	T	12,0	0,5	32,0	8,28	1	0.222222	0.777778
1H	494831056	C	T	12,0	0,5	31,0	9,27	1	0.25	0.75
1H	494831060	A	G	12,0	0,5	31,0	9,27	1	0.25	0.75
1H	494831112	G	T	11,0	0,6	33,0	10,27	1	0.27027	0.72973
1H	494831171	G	A	8,0	0,6	28,5	9,24	0.848485	0.272727	0.575758
1H	494831238	A	T	8,0	0,9	47,7	8,21	0.87037	0.275862	0.594508
1H	494831249	A	G	8,0	0,11	49,7	8,22	0.875	0.266667	0.608333
1H	494831273	TTC	T	8,0	0,12	53,6	9,23	0.898305	0.28125	0.617055
1H	494831277	A	AG	7,0	0,12	52,6	9,23	0.896552	0.28125	0.615302
1H	494831476	A	G	12,0	1,8	63,0	3,22	1	0.12	0.88
1H	494832772	G	A	7,0	0,7	32,3	5,9	0.914286	0.357143	0.557143
1H	494833855	C	T	19,0	0,14	58,7	9,27	0.892308	0.25	0.642308
1H	494834235	G	GCAGCAC	6,0	0,6	48,0	13,17	1	0.433333	0.566667
1H	494834759	T	A	6,0	0,7	56,6	11,32	0.903226	0.255814	0.647412
1H	494834841	G	C	7,0	0,10	50,10	6,31	0.833333	0.162162	0.671171
1H	494835051	A	G	9,0	0,14	55,0	1,27	1	0.0357143	0.964286
1H	494835273	G	A	10,0	0,8	49,0	10,30	1	0.25	0.75
1H	494835704	C	T	5,0	0,9	61,0	6,30	1	0.166667	0.833333
1H	494835934	C	T	14,0	0,8	61,0	15,23	1	0.394737	0.605263
1H	494835966	G	A	14,0	0,7	56,0	11,21	1	0.34375	0.65625
1H	494836113	T	C	10,0	0,7	53,0	12,22	1	0.352941	0.647059
1H	494836135	A	G	8,0	0,6	53,0	11,25	1	0.305556	0.694444
1H	494836287	A	G	18,0	0,11	47,0	6,15	1	0.285714	0.714286
1H	494836297	G	A	20,0	0,12	47,0	6,13	1	0.315789	0.684211
1H	494836572	A	G	8,0	0,10	47,0	7,20	1	0.259259	0.740741
1H	494836582	G	A	8,0	0,9	47,0	7,17	1	0.291667	0.708333
1H	494836732	AAATCTCTGCACACCTAG	A	8,0	0,6	54,0	12,27	1	0.307692	0.692308
1H	494836860	T	A	10,0	0,6	48,0	11,23	1	0.323529	0.676471
1H	494836953	T	A	18,0	0,5	55,7	10,24	0.887097	0.294118	0.592979
1H	494836984	A	G	15,0	0,6	57,5	12,27	0.919355	0.307692	0.611663
1H	494837044	A	G	14,0	0,10	68,0	14,33	1	0.297872	0.702128
1H	494837090	A	C	11,0	0,11	57,0	18,39	1	0.315789	0.684211
1H	494838012	T	A	10,0	0,9	48,0	6,12	1	0.333333	0.666667
1H	494838137	T	C	11,0	0,7	41,0	12,18	1	0.4	0.6
1H	494838138	G	A	10,0	0,8	41,0	12,18	1	0.4	0.6
1H	494838167	T	G	10,0	0,8	41,0	11,18	1	0.37931	0.62069
1H	494838203	T	G	10,0	0,8	43,0	9,19	1	0.321429	0.678571
1H	494838226	T	C	7,0	0,8	40,0	7,17	1	0.291667	0.708333
1H	494838855	C	T	10,0	0,6	65,0	13,22	1	0.371429	0.628571
1H	494839510	A	G	9,0	0,5	48,0	5,17	1	0.227273	0.772727
1H	494839567	T	C	12,0	1,6	37,4	6,17	0.902439	0.26087	0.641569
1H	494839630	C	A	12,0	1,6	39,0	14,19	1	0.424242	0.575758
1H	494841084	G	A	13,0	0,5	52,0	14,14	1	0.5	0.5
1H	494841123	T	G	12,0	0,5	48,7	9,17	0.872727	0.346154	0.526573
1H	494841252	G	A	9,0	0,5	48,8	8,21	0.857143	0.275862	0.581281
1H	494841264	C	T	10,0	0,6	47,8	12,23	0.854545	0.342857	0.511688
1H	494841324	A	G	8,0	0,5	39,11	12,21	0.78	0.363636	0.416364
1H	494841422	A	G	5,0	0,5	43,9	9,23	0.826923	0.28125	0.545673
1H	494841440	A	C	5,0	0,5	45,7	10,28	0.865385	0.263158	0.602227
1H	494841455	A	AT	6,0	0,8	47,9	8,25	0.839286	0.242424	0.596861
1H	494841458	A	T	6,0	0,8	48,9	8,26	0.842105	0.235294	0.606811
1H	494844196	A	T	6,0	0,5	31,0	6,16	1	0.272727	0.727273
1H	494844634	A	T	9,0	0,5	43,0	15,4	1	0.789474	0.210526
1H	494844689	G	T	7,0	0,6	44,0	9,11	1	0.45	0.55
1H	494844730	T	G	9,0	0,5	45,0	9,12	1	0.428571	0.571429
1H	494844783	G	A	9,0	0,7	39,0	5,16	1	0.238095	0.761905
1H	494844903	C	T	5,0	0,7	31,0	7,20	1	0.259259	0.740741
1H	494845253	A	G	5,0	0,8	32,0	6,27	1	0.181818	0.818182
1H	494845271	A	G	6,0	0,9	32,0	7,25	1	0.21875	0.78125
1H	494845278	G	T	7,0	0,9	30,0	8,25	1	0.242424	0.757576
1H	494845296	A	G	10,0	0,10	35,0	9,27	1	0.25	0.75
1H	494845924	G	A	12,0	0,9	47,7	6,23	0.87037	0.206897	0.663474
1H	494846039	G	A	12,0	0,9	48,0	8,14	1	0.363636	0.636364
1H	494846055	A	G	10,0	0,7	46,0	7,10	1	0.411765	0.588235
1H	494848319	TG	T	12,0	0,7	55,7	7,5	0.887097	0.583333	0.303763
1H	494848392	C	A	13,0	0,11	57,10	12,10	0.850746	0.545455	0.305292
1H	494848404	C	T	13,0	0,11	56,8	13,10	0.875	0.565217	0.309783
1H	494848414	G	C	12,0	0,10	58,6	13,10	0.90625	0.565217	0.341033
1H	494848525	C	CT	11,0	0,12	72,0	12,8	1	0.6	0.4
1H	494848526	C	A	11,0	0,12	72,0	12,8	1	0.6	0.4
1H	494848578	T	TTTCAAAAAATG	8,0	0,11	67,0	11,8	1	0.578947	0.421053
1H	494848593	A	G	10,0	0,7	66,0	12,8	1	0.6	0.4
1H	494848632	AAAAT	A	9,0	0,7	50,0	7,13	1	0.35	0.65
1H	494848734	A	G	6,0	0,7	44,5	7,10	0.897959	0.411765	0.486194
1H	494848783	A	G	5,0	0,7	58,6	7,11	0.90625	0.388889	0.517361
1H	494848786	A	T	7,0	0,8	58,6	7,11	0.90625	0.388889	0.517361
1H	494848824	T	TA	13,0	0,9	52,5	5,15	0.912281	0.25	0.662281
1H	494848866	TAA	T	19,0	0,9	57,2	7,17	0.966102	0.291667	0.674435
1H	494848899	A	T	20,0	0,9	58,0	6,16	1	0.272727	0.727273
1H	494848906	A	ATT	20,0	0,9	58,0	6,12	1	0.333333	0.666667
1H	494848916	T	A	24,0	0,11	58,0	6,12	1	0.333333	0.666667
1H	494848929	A	G	24,0	0,12	61,0	6,10	1	0.375	0.625
1H	494849059	A	G	17,0	0,5	52,3	6,5	0.945455	0.545455	0.4
1H	494849063	C	T	16,0	0,5	50,3	6,5	0.943396	0.545455	0.397942
1H	494849124	T	C	8,0	0,12	51,6	5,13	0.894737	0.277778	0.616959
1H	494849848	C	A	6,0	0,8	41,7	14,20	0.854167	0.411765	0.442402
1H	494849858	G	C	6,0	0,8	42,6	15,22	0.875	0.405405	0.469595
1H	494849898	G	A	5,0	0,7	42,5	12,21	0.893617	0.363636	0.529981
1H	494849901	A	G	5,0	0,7	41,5	12,20	0.891304	0.375	0.516304
1H	494849922	C	T	5,0	0,7	43,6	13,26	0.877551	0.333333	0.544218
1H	494850256	C	T	8,0	0,5	55,4	7,35	0.932203	0.166667	0.765537
1H	494850334	A	T	8,0	0,5	46,5	6,31	0.901961	0.162162	0.739799
1H	494851053	T	C	9,0	0,6	28,5	5,10	0.848485	0.333333	0.515152
1H	494851059	T	G	10,0	0,8	28,5	5,10	0.848485	0.333333	0.515152
1H	494851063	C	T	10,0	0,8	29,5	5,10	0.852941	0.333333	0.519608
1H	494851064	G	C	10,0	0,8	29,5	5,10	0.852941	0.333333	0.519608
1H	494851075	T	C	11,0	0,7	26,5	5,10	0.83871	0.333333	0.505376
1H	494851080	G	T	11,0	0,7	26,5	5,10	0.83871	0.333333	0.505376
1H	494851083	G	A	11,0	0,7	27,5	5,10	0.84375	0.333333	0.510417
1H	494851100	T	A	10,0	0,5	29,4	4,11	0.878788	0.266667	0.612121
1H	494851246	G	A	6,0	0,5	45,0	9,21	1	0.3	0.7
1H	494851266	T	G	7,0	0,6	36,3	8,23	0.923077	0.258065	0.665012
1H	494851267	G	C	8,0	0,6	35,3	8,23	0.921053	0.258065	0.662988
1H	494851270	C	T	9,0	0,6	36,3	8,23	0.923077	0.258065	0.665012
1H	494851277	T	C	7,0	0,6	37,3	7,20	0.925	0.259259	0.665741
1H	494851279	A	T	7,0	0,6	38,3	8,22	0.926829	0.266667	0.660163
1H	494851295	G	GGGGGTACA	7,0	0,6	38,3	9,24	0.926829	0.272727	0.654102
1H	494851304	A	G	8,0	0,8	38,4	8,24	0.904762	0.25	0.654762
1H	494851312	T	G	8,0	0,7	40,5	7,21	0.888889	0.25	0.638889
1H	494851329	G	GTCATTCC	7,0	0,9	32,6	7,23	0.842105	0.233333	0.608772
1H	494851364	G	A	7,0	0,10	35,5	5,28	0.875	0.151515	0.723485
1H	494851378	C	CCATG	7,0	0,10	32,6	6,23	0.842105	0.206897	0.635209
1H	494851493	T	G	10,0	0,8	39,6	3,17	0.866667	0.15	0.716667
1H	494851512	A	T	11,0	0,7	33,6	3,16	0.846154	0.157895	0.688259
1H	494853082	A	G	8,0	0,6	44,5	16,23	0.897959	0.410256	0.487703
1H	494853169	C	A	7,0	0,7	45,0	17,18	1	0.485714	0.514286
1H	494853205	C	CT	9,0	0,5	56,0	13,15	1	0.464286	0.535714
1H	494853207	C	T	9,0	0,5	57,0	13,15	1	0.464286	0.535714
1H	494858557	G	A	0,6	9,0	5,43	22,16	0.895833	0.421053	0.474781
1H	494859014	C	T	6,0	0,7	50,0	13,26	1	0.333333	0.666667
1H	494867868	C	T	6,0	0,6	42,0	8,37	1	0.177778	0.822222
1H	494870098	A	G	9,0	0,10	33,4	13,24	0.891892	0.351351	0.540541
1H	494870320	C	G	8,0	0,8	67,11	17,24	0.858974	0.414634	0.44434
1H	494880705	C	T	7,0	0,6	42,5	17,10	0.893617	0.62963	0.263987
1H	494881921	A	G	7,0	0,5	29,0	3,9	1	0.25	0.75
1H	494881945	G	A	7,0	0,5	31,0	6,9	1	0.4	0.6
1H	494881955	G	A	8,0	0,6	32,0	6,10	1	0.375	0.625
1H	494882240	C	T	8,0	0,5	55,0	11,12	1	0.478261	0.521739
1H	494882269	A	G	10,0	0,6	55,0	16,14	1	0.533333	0.466667
1H	494882336	T	A	8,0	0,10	52,4	13,16	0.928571	0.448276	0.480296
1H	494882372	T	C	7,0	0,7	45,3	12,16	0.9375	0.428571	0.508929
1H	494882402	AG	A	7,0	0,8	45,4	9,15	0.918367	0.375	0.543367
1H	494882935	A	C	9,0	0,16	50,0	0,15	1	0	1
1H	494883401	A	G	11,0	0,8	50,0	9,6	1	0.6	0.4
1H	494883420	A	G	12,0	0,10	50,0	12,8	1	0.6	0.4
1H	494883462	G	A	17,0	0,10	50,0	11,8	1	0.578947	0.421053
1H	494883533	A	G	14,0	0,10	50,0	11,11	1	0.5	0.5
1H	494883559	C	T	12,0	0,9	58,0	10,9	1	0.526316	0.473684
1H	494883615	G	T	7,0	0,8	50,0	8,14	1	0.363636	0.636364
1H	494883847	T	TCTA	5,0	0,6	46,0	4,15	1	0.210526	0.789474
1H	494884043	C	T	10,0	0,6	41,4	9,17	0.911111	0.346154	0.564957
1H	494884127	C	G	11,0	0,6	52,0	9,13	1	0.409091	0.590909
1H	494885466	A	C	9,0	0,7	34,0	15,9	1	0.625	0.375
1H	494885473	C	T	9,0	0,6	33,0	15,9	1	0.625	0.375
1H	494885570	G	T	7,0	0,7	35,0	11,14	1	0.44	0.56
1H	494885579	A	C	7,0	0,7	35,0	12,14	1	0.461538	0.538462
1H	494885652	C	T	7,0	0,6	58,0	14,19	1	0.424242	0.575758
1H	494885727	G	A	5,0	0,6	53,6	15,24	0.898305	0.384615	0.51369
1H	494887595	A	G	11,0	0,8	34,0	5,14	1	0.263158	0.736842
1H	494887647	C	T	6,0	0,7	25,0	5,15	1	0.25	0.75
1H	494887658	A	G	6,0	0,8	22,0	6,19	1	0.24	0.76
1H	494887659	C	T	6,0	0,8	22,0	6,19	1	0.24	0.76
1H	494887829	G	C	5,0	0,9	44,6	11,25	0.88	0.305556	0.574444
1H	494887931	T	C	10,0	0,5	57,0	14,30	1	0.318182	0.681818
1H	494888021	C	T	7,0	0,7	48,0	13,25	1	0.342105	0.657895
1H	494888412	A	AT	9,0	0,11	60,4	5,11	0.9375	0.3125	0.625
1H	494888418	C	T	10,0	0,12	60,5	5,11	0.923077	0.3125	0.610577
1H	494888425	C	A	11,0	0,12	60,5	5,14	0.923077	0.263158	0.659919
1H	494888621	CA	C	6,0	0,8	44,3	8,28	0.93617	0.222222	0.713948
1H	494888646	G	C	8,0	0,8	51,0	9,29	1	0.236842	0.763158
1H	494888692	C	T	9,0	0,12	44,4	9,28	0.916667	0.243243	0.673423
1H	494888737	C	T	8,0	0,13	48,0	3,21	1	0.125	0.875
1H	494888749	C	T	8,0	0,13	47,0	3,23	1	0.115385	0.884615
1H	494888987	C	T	8,0	0,7	35,2	1,10	0.945946	0.0909091	0.855037
1H	494889024	GT	G	7,0	0,10	50,3	0,11	0.943396	0	0.943396
1H	494889030	T	G	9,0	0,10	49,3	0,11	0.942308	0	0.942308
1H	494889033	T	C	7,0	0,10	49,3	0,11	0.942308	0	0.942308
1H	494889072	C	T	7,0	0,12	51,6	1,9	0.894737	0.1	0.794737
1H	494889073	G	A	7,0	0,12	51,6	1,9	0.894737	0.1	0.794737
1H	494889089	C	CT	8,0	0,12	50,7	3,8	0.877193	0.272727	0.604466
1H	494889099	AT	A	8,0	0,12	55,8	3,7	0.873016	0.3	0.573016
1H	494889113	C	A	6,0	0,11	59,8	3,9	0.880597	0.25	0.630597
1H	494889120	A	T	6,0	0,12	59,8	3,10	0.880597	0.230769	0.649828
1H	494889208	T	A	12,0	0,10	54,6	10,12	0.9	0.454545	0.445455
1H	494889258	AT	A	12,0	0,7	55,0	11,12	1	0.478261	0.521739
1H	494889455	AT	A	11,0	0,8	78,0	13,20	1	0.393939	0.606061
1H	494889503	A	G	10,0	0,8	73,4	13,23	0.948052	0.361111	0.586941
1H	494889612	C	T	9,0	0,10	50,7	15,35	0.877193	0.3	0.577193
1H	494889789	A	G	13,0	0,6	47,0	16,18	1	0.470588	0.529412
1H	494889817	A	G	13,0	1,4	47,0	17,24	1	0.414634	0.585366
1H	494891098	T	C	13,0	0,5	51,0	4,20	1	0.166667	0.833333
1H	494892363	G	A	12,0	0,8	36,7	8,18	0.837209	0.307692	0.529517
1H	494893419	C	T	17,0	0,6	41,4	8,17	0.911111	0.32	0.591111
1H	494894549	A	T	14,0	0,18	54,0	13,33	1	0.282609	0.717391
1H	494895449	G	A	9,0	0,10	54,0	14,34	1	0.291667	0.708333
1H	494895460	A	C	9,0	0,8	67,0	14,34	1	0.291667	0.708333
1H	494896530	ACTACCTCC	A	5,0	0,6	39,0	8,23	1	0.258065	0.741935
1H	494896642	C	T	11,0	0,5	39,4	10,22	0.906977	0.3125	0.594477
1H	494896662	T	C	10,0	0,6	38,4	11,23	0.904762	0.323529	0.581232
1H	494896944	T	TA	16,0	0,7	49,0	16,16	1	0.5	0.5
1H	494896971	T	A	17,0	0,8	49,0	19,9	1	0.678571	0.321429
1H	494897216	T	A	11,0	0,9	47,7	9,16	0.87037	0.36	0.51037
1H	494897304	A	T	11,0	0,13	60,8	10,16	0.882353	0.384615	0.497738
1H	494897418	T	C	10,0	0,10	43,6	10,10	0.877551	0.5	0.377551
1H	494897460	C	T	9,0	0,11	49,4	7,14	0.924528	0.333333	0.591195
1H	494897476	A	G	10,0	0,8	44,5	7,13	0.897959	0.35	0.547959
1H	494897498	A	G	11,0	0,7	43,5	11,13	0.895833	0.458333	0.4375
1H	494897513	C	T	11,0	0,6	44,5	11,10	0.897959	0.52381	0.37415
1H	494897517	C	T	10,0	0,5	43,5	11,8	0.895833	0.578947	0.316886
1H	494898283	G	A	9,0	0,5	47,3	14,15	0.94	0.482759	0.457241
1H	494898284	A	G	9,0	0,5	47,3	14,15	0.94	0.482759	0.457241
1H	494898289	T	C	7,0	0,5	47,3	12,17	0.94	0.413793	0.526207
1H	494899884	G	GT	8,0	0,5	29,4	7,9	0.878788	0.4375	0.441288
1H	494899923	G	A	8,0	0,5	35,2	9,12	0.945946	0.428571	0.517375
1H	494899929	T	C	8,0	0,5	37,0	9,13	1	0.409091	0.590909
1H	494900178	A	T	12,0	0,8	59,0	10,19	1	0.344828	0.655172
1H	494900232	C	T	8,0	0,7	59,0	10,20	1	0.333333	0.666667
1H	494900309	G	C	9,0	0,8	55,7	5,23	0.887097	0.178571	0.708525
1H	494900356	C	T	7,0	0,9	53,10	4,23	0.84127	0.148148	0.693122
1H	494900371	A	G	5,0	0,11	58,8	4,20	0.878788	0.166667	0.712121
1H	494901044	T	TG	14,0	0,9	46,0	6,15	1	0.285714	0.714286
1H	494905568	T	C	8,0	0,8	37,5	6,15	0.880952	0.285714	0.595238
1H	494905577	C	T	8,0	0,8	36,4	6,14	0.9	0.3	0.6
1H	494905622	T	C	10,0	0,8	36,5	5,11	0.878049	0.3125	0.565549
1H	494905627	G	C	10,0	0,7	35,5	3,11	0.875	0.214286	0.660714
1H	494905651	A	G	11,0	0,5	37,4	3,12	0.902439	0.2	0.702439
1H	494905660	C	A	11,0	0,7	41,4	3,12	0.911111	0.2	0.711111
1H	494905781	T	C	8,0	0,7	50,5	7,11	0.909091	0.388889	0.520202
1H	494905804	G	T	7,0	0,7	48,5	8,9	0.90566	0.470588	0.435072
1H	494906666	A	T	16,0	0,10	40,0	4,27	1	0.129032	0.870968
1H	494906693	A	G	15,0	0,12	37,0	5,25	1	0.166667	0.833333
1H	494906729	G	A	13,0	0,14	37,0	7,23	1	0.233333	0.766667
1H	494906827	A	G	10,0	0,11	37,0	8,12	1	0.4	0.6
1H	494906926	A	G	5,0	0,12	49,0	8,9	1	0.470588	0.529412
1H	494907107	C	T	6,0	0,11	31,0	6,11	1	0.352941	0.647059
1H	494907108	C	T	6,0	0,11	31,0	6,10	1	0.375	0.625
1H	494907128	T	G	5,0	0,10	28,0	6,13	1	0.315789	0.684211
1H	494907130	C	A	5,0	0,10	28,0	6,13	1	0.315789	0.684211
1H	494907137	C	T	5,0	0,7	28,0	6,13	1	0.315789	0.684211
1H	494907271	TC	T	7,0	0,8	47,9	6,14	0.839286	0.3	0.539286
1H	494907351	CT	C	9,0	0,6	53,8	6,13	0.868852	0.315789	0.553063
1H	494907472	A	T	9,0	0,7	69,0	13,24	1	0.351351	0.648649
1H	494907549	A	T	9,0	0,6	58,0	14,27	1	0.341463	0.658537
1H	494907583	T	A	11,0	0,7	58,0	12,22	1	0.352941	0.647059
1H	494907597	G	T	14,0	0,6	58,0	11,21	1	0.34375	0.65625
1H	494907601	A	T	14,0	0,6	58,0	10,21	1	0.322581	0.677419
1H	494907669	A	G	19,0	0,12	47,0	11,19	1	0.366667	0.633333
1H	494907673	T	C	19,0	0,12	47,0	11,18	1	0.37931	0.62069
1H	494907754	TAGA	T	18,0	0,11	40,4	13,19	0.909091	0.40625	0.502841
1H	494907817	C	G	10,0	0,10	39,7	11,19	0.847826	0.366667	0.481159
1H	494907881	C	T	13,0	0,11	44,5	9,20	0.897959	0.310345	0.587614
1H	494908065	G	GGCTA	5,0	0,5	47,0	5,21	1	0.192308	0.807692
1H	494908081	TAAA	T	7,0	0,5	63,0	5,20	1	0.2	0.8
1H	494908096	C	T	6,0	0,5	62,0	6,20	1	0.230769	0.769231
1H	494908472	C	G	5,0	0,9	54,0	3,12	1	0.2	0.8
1H	494908567	T	C	10,0	0,6	61,0	7,12	1	0.368421	0.631579
1H	494908595	G	T	9,0	0,6	48,3	4,9	0.941176	0.307692	0.633484
1H	494926741	T	G	7,0	0,7	38,0	11,9	1	0.55	0.45
1H	494926797	A	G	6,0	1,6	39,0	12,9	1	0.571429	0.428571
1H	494926799	A	G	6,0	1,6	39,0	12,9	1	0.571429	0.428571
1H	494926810	T	G	6,0	1,6	44,0	10,8	1	0.555556	0.444444
1H	494926820	T	C	8,0	1,6	41,0	9,6	1	0.6	0.4
1H	494926827	C	G	7,0	1,6	41,0	8,5	1	0.615385	0.384615
1H	494926834	A	G	7,0	1,6	41,0	9,5	1	0.642857	0.357143
1H	494950735	T	C	10,0	0,8	34,5	4,9	0.871795	0.307692	0.564103
1H	494950760	T	C	11,0	0,9	36,5	4,10	0.878049	0.285714	0.592334
1H	494950829	T	C	17,0	0,8	35,5	5,14	0.875	0.263158	0.611842
1H	494950838	A	T	16,0	0,9	33,5	6,14	0.868421	0.3	0.568421
1H	494950866	T	A	12,0	0,6	30,6	6,20	0.833333	0.230769	0.602564
1H	494950867	C	T	12,0	0,6	30,6	6,20	0.833333	0.230769	0.602564
1H	494950880	C	T	11,0	0,6	30,5	6,21	0.857143	0.222222	0.634921
1H	494950940	T	C	11,0	0,10	37,0	5,18	1	0.217391	0.782609
1H	494950968	A	C	13,0	0,9	41,0	4,23	1	0.148148	0.851852
1H	494951361	G	C	6,0	0,8	56,7	11,28	0.888889	0.282051	0.606838
1H	494951383	T	C	6,0	0,7	61,7	12,28	0.897059	0.3	0.597059
1H	494951451	A	G	7,0	0,7	65,9	10,19	0.878378	0.344828	0.533551
1H	494953602	AT	A	7,0	0,5	46,3	9,13	0.938776	0.409091	0.529685
1H	494953610	C	CG	8,0	0,5	47,2	9,13	0.959184	0.409091	0.550093
1H	494953654	T	C	11,0	0,5	40,2	9,15	0.952381	0.375	0.577381
1H	494953661	A	AG	8,0	0,5	39,2	7,14	0.95122	0.333333	0.617886
1H	494953662	T	A	8,0	0,5	39,2	7,14	0.95122	0.333333	0.617886
1H	494953664	T	A	8,0	0,5	39,2	7,14	0.95122	0.333333	0.617886
1H	494953701	A	G	8,0	0,5	34,4	7,12	0.894737	0.368421	0.526316
1H	494953727	C	T	8,0	0,5	39,4	9,14	0.906977	0.391304	0.515672
1H	494953759	T	G	5,0	0,7	50,6	12,20	0.892857	0.375	0.517857
1H	494953879	T	A	5,0	0,7	51,9	11,27	0.85	0.289474	0.560526
1H	494953959	C	T	11,0	0,10	60,0	7,21	1	0.25	0.75
1H	494953997	A	T	12,0	0,10	59,0	5,19	1	0.208333	0.791667
1H	494954077	G	A	9,0	0,7	52,4	8,19	0.928571	0.296296	0.632275
1H	494954168	C	T	9,0	0,5	57,0	8,20	1	0.285714	0.714286
1H	494954201	G	C	8,0	0,5	55,0	8,17	1	0.32	0.68
1H	494954203	G	C	8,0	0,5	55,0	8,17	1	0.32	0.68
1H	494954216	C	T	8,0	0,5	55,0	6,17	1	0.26087	0.73913
1H	494954218	C	A	9,0	0,5	55,0	6,17	1	0.26087	0.73913
1H	494954522	G	A	16,0	0,5	24,3	10,14	0.888889	0.416667	0.472222
1H	494954524	G	A	16,0	0,5	25,3	10,15	0.892857	0.4	0.492857
1H	494954773	G	T	9,0	0,5	38,5	12,19	0.883721	0.387097	0.496624
1H	494954783	G	T	10,0	0,5	37,4	13,18	0.902439	0.419355	0.483084
1H	494954916	C	T	9,0	0,15	49,6	7,17	0.890909	0.291667	0.599242
1H	494954943	A	C	8,0	0,12	46,8	5,21	0.851852	0.192308	0.659544
1H	494954953	G	C	6,0	0,11	46,10	5,21	0.821429	0.192308	0.629121
1H	494955026	A	G	10,0	0,6	53,5	7,19	0.913793	0.269231	0.644562
1H	494955030	G	C	10,0	0,5	53,5	7,18	0.913793	0.28	0.633793
1H	494955043	A	C	9,0	0,6	52,6	8,17	0.896552	0.32	0.576552
1H	494955050	A	G	9,0	0,6	46,5	7,18	0.901961	0.28	0.621961
1H	494955074	CT	C	10,0	0,5	48,5	7,17	0.90566	0.291667	0.613994
1H	494955174	G	T	14,0	0,8	38,6	2,20	0.863636	0.0909091	0.772727
1H	494955227	G	A	9,0	0,7	54,0	8,24	1	0.25	0.75
1H	494955233	A	G	8,0	0,8	51,0	8,23	1	0.258065	0.741935
1H	494955249	GC	G	10,0	0,7	51,0	12,21	1	0.363636	0.636364
1H	494955369	G	T	7,0	0,7	45,0	9,21	1	0.3	0.7
1H	494955613	C	T	6,0	0,8	41,3	14,23	0.931818	0.378378	0.55344
1H	494955646	A	G	8,0	0,8	38,7	15,26	0.844444	0.365854	0.478591
1H	494955671	C	CTTTTT	11,0	0,5	33,3	13,30	0.916667	0.302326	0.614341
1H	494955711	T	C	11,0	0,6	32,0	13,28	1	0.317073	0.682927
1H	494955739	C	A	12,0	0,7	31,0	17,29	1	0.369565	0.630435
1H	494955783	G	T	16,0	0,7	29,0	12,24	1	0.333333	0.666667
1H	494955787	G	C	16,0	0,7	29,0	12,23	1	0.342857	0.657143
1H	494955827	G	A	12,0	0,6	32,0	12,18	1	0.4	0.6
1H	494955834	G	T	13,0	0,5	30,0	12,17	1	0.413793	0.586207
1H	494956022	G	A	8,0	0,5	43,0	8,11	1	0.421053	0.578947
1H	494956282	A	C	8,0	0,5	49,0	6,19	1	0.24	0.76
1H	494956354	G	A	6,0	0,7	37,5	7,18	0.880952	0.28	0.600952
1H	494956386	TA	T	7,0	0,7	35,4	8,20	0.897436	0.285714	0.611722
1H	494956462	G	A	10,0	0,8	30,5	12,16	0.857143	0.428571	0.428571
1H	494956536	C	G	6,0	0,5	35,6	11,16	0.853659	0.407407	0.446251
1H	494956580	G	T	7,0	0,7	34,7	9,17	0.829268	0.346154	0.483114
1H	494957097	T	G	6,0	0,5	33,3	3,10	0.916667	0.230769	0.685897
1H	494957108	G	C	5,0	0,5	32,4	4,11	0.888889	0.266667	0.622222
1H	494957122	T	G	5,0	0,6	34,4	5,11	0.894737	0.3125	0.582237
1H	494957125	T	C	5,0	0,6	35,4	5,10	0.897436	0.333333	0.564103
1H	494957582	T	C	5,0	0,6	57,7	5,24	0.890625	0.172414	0.718211
1H	494957625	T	C	8,0	0,5	56,7	4,23	0.888889	0.148148	0.740741
1H	494958012	G	A	6,0	0,8	45,5	6,21	0.9	0.222222	0.677778
1H	494958063	G	A	7,0	0,9	46,6	5,14	0.884615	0.263158	0.621457
1H	494958396	T	C	14,0	0,6	65,11	5,24	0.855263	0.172414	0.682849
1H	494958423	TCA	T	16,0	0,8	66,12	4,20	0.846154	0.166667	0.679487
1H	494958426	TTTTC	T	16,0	0,8	65,12	3,20	0.844156	0.130435	0.713721
1H	494958511	C	G	18,0	0,10	62,15	6,20	0.805195	0.230769	0.574426
1H	494958515	A	G	18,0	0,10	63,14	6,19	0.818182	0.24	0.578182
1H	494958549	T	C	16,0	0,12	59,12	7,15	0.830986	0.318182	0.512804
1H	494958550	A	T	16,0	0,12	59,12	7,14	0.830986	0.333333	0.497653
1H	494958588	C	CA	13,0	0,11	51,10	6,13	0.836066	0.315789	0.520276
1H	494958647	T	C	8,0	0,9	58,11	6,12	0.84058	0.333333	0.507246
1H	494958678	A	G	8,0	0,8	51,9	10,7	0.85	0.588235	0.261765
1H	494958836	C	A	6,0	0,5	58,0	8,5	1	0.615385	0.384615
1H	494964383	A	G	8,0	0,7	30,3	7,16	0.909091	0.304348	0.604743
1H	494964984	CT	C	0,10	8,0	5,38	18,8	0.883721	0.307692	0.576029
1H	494965071	T	A	17,0	0,8	38,4	11,18	0.904762	0.37931	0.525452
1H	494965141	AC	A	0,9	5,0	5,37	19,8	0.880952	0.296296	0.584656
1H	494965146	T	C	0,9	6,0	5,37	18,8	0.880952	0.307692	0.57326
1H	494965213	A	G	5,0	0,6	37,2	8,23	0.948718	0.258065	0.690653
1H	494965225	G	C	5,0	0,6	37,2	7,21	0.948718	0.25	0.698718
1H	494965421	A	G	0,6	6,0	2,35	21,8	0.945946	0.275862	0.670084
1H	494965523	G	A	8,0	0,8	27,1	7,16	0.964286	0.304348	0.659938
1H	494965539	C	A	9,0	0,8	25,0	6,14	1	0.3	0.7
1H	494967594	G	A	5,0	0,10	23,2	9,13	0.92	0.409091	0.510909
1H	494967602	C	G	6,0	0,10	21,2	9,14	0.913043	0.391304	0.521739
1H	494967628	C	T	0,5	7,0	0,23	11,8	1	0.421053	0.578947
1H	494967826	C	T	0,5	7,0	10,32	17,5	0.761905	0.227273	0.534632
1H	494967831	T	TC	0,5	7,0	10,32	17,5	0.761905	0.227273	0.534632
1H	494980096	G	C	8,0	0,5	8,4	19,5	0.666667	0.791667	-0.125
1H	494981787	G	A	10,0	0,6	53,5	7,16	0.913793	0.304348	0.609445
1H	494981792	A	G	10,0	0,7	53,7	7,16	0.883333	0.304348	0.578986
1H	494981802	G	A	0,10	8,0	7,51	17,8	0.87931	0.32	0.55931
1H	494981820	A	C	0,10	9,0	7,55	15,8	0.887097	0.347826	0.539271
1H	494981848	G	A	0,11	9,0	7,51	17,10	0.87931	0.37037	0.50894
1H	494981849	C	G	0,11	10,0	7,52	17,10	0.881356	0.37037	0.510986
1H	494981873	G	T	0,9	12,0	6,49	19,10	0.890909	0.344828	0.546082
1H	494981874	A	G	0,9	12,0	6,49	19,10	0.890909	0.344828	0.546082
1H	494981954	G	A	7,0	0,8	46,4	9,22	0.92	0.290323	0.629677
1H	494982062	ATG	A	9,0	0,9	48,6	7,24	0.888889	0.225806	0.663082
1H	494982088	T	C	0,6	9,0	6,54	24,5	0.9	0.172414	0.727586
1H	494990804	C	T	7,0	0,5	20,2	9,10	0.909091	0.473684	0.435407
1H	494992279	C	G	6,0	0,7	40,2	7,19	0.952381	0.269231	0.68315
1H	494993558	T	C	6,0	0,18	22,6	5,18	0.785714	0.217391	0.568323
1H	494993582	T	C	8,0	0,17	23,6	5,16	0.793103	0.238095	0.555008
1H	494993679	T	C	0,7	8,0	0,22	10,7	1	0.411765	0.588235
1H	494993689	A	AAGGT	0,6	8,0	0,20	10,7	1	0.411765	0.588235
1H	494995102	C	T	0,8	5,0	3,53	13,4	0.946429	0.235294	0.711134
1H	494995237	G	T	0,5	7,0	7,52	16,11	0.881356	0.407407	0.473949
1H	494995251	A	G	0,5	7,0	7,47	21,11	0.87037	0.34375	0.52662
1H	494995267	G	A	0,7	7,0	6,48	21,9	0.888889	0.3	0.588889
1H	494995329	G	A	0,10	6,0	3,50	25,9	0.943396	0.264706	0.67869
1H	494995424	G	C	0,11	6,0	4,31	26,8	0.885714	0.235294	0.65042
1H	494995462	G	A	0,8	6,0	6,33	25,7	0.846154	0.21875	0.627404
1H	494995990	A	AC	0,5	5,0	3,24	13,9	0.888889	0.409091	0.479798
1H	494996009	C	G	8,0	0,5	29,0	9,14	1	0.391304	0.608696
1H	494997443	T	C	0,7	7,0	4,37	10,6	0.902439	0.375	0.527439
1H	494997603	T	A	0,10	9,0	6,28	16,6	0.823529	0.272727	0.550802
1H	494998907	A	G	0,17	7,0	3,47	32,12	0.94	0.272727	0.667273
1H	494998984	A	G	18,0	0,8	54,0	13,38	1	0.254902	0.745098
1H	494999065	GTTC	G	0,10	7,0	3,61	30,12	0.953125	0.285714	0.667411
1H	494999120	C	T	8,0	0,6	65,0	11,32	1	0.255814	0.744186
1H	494999724	T	A	0,6	9,0	2,48	27,11	0.96	0.289474	0.670526
1H	495001080	C	G	0,14	7,0	5,46	23,16	0.901961	0.410256	0.491704
1H	495002851	A	G	9,0	0,6	44,0	5,22	1	0.185185	0.814815
1H	495003046	A	G	0,14	11,0	5,65	24,13	0.928571	0.351351	0.57722
1H	495003232	T	C	0,7	11,0	5,63	27,8	0.926471	0.228571	0.697899
1H	495003352	G	A	11,0	0,11	60,0	12,30	1	0.285714	0.714286
1H	495004139	T	G	0,17	6,0	5,68	37,10	0.931507	0.212766	0.718741
1H	495004602	G	A	11,0	0,7	33,6	6,18	0.846154	0.25	0.596154
1H	495004613	C	CT	10,0	0,7	31,5	6,20	0.861111	0.230769	0.630342
1H	495004685	T	A	12,0	0,9	26,11	6,13	0.702703	0.315789	0.386913
1H	495004744	G	A	12,0	0,8	32,10	8,16	0.761905	0.333333	0.428571
1H	495004754	C	T	12,0	0,8	32,9	7,17	0.780488	0.291667	0.488821
1H	495005123	C	T	0,9	6,0	0,26	21,10	1	0.322581	0.677419
1H	495005228	C	T	0,5	7,0	5,37	20,6	0.880952	0.230769	0.650183
1H	495005249	C	T	5,0	0,5	40,6	7,25	0.869565	0.21875	0.650815
1H	495005509	A	T	0,12	7,0	1,60	23,8	0.983607	0.258065	0.725542
1H	495005622	C	G	6,0	0,8	42,0	8,23	1	0.258065	0.741935
1H	495005707	C	A	0,6	7,0	7,32	22,13	0.820513	0.371429	0.449084
1H	495005756	T	C	0,6	7,0	9,48	27,12	0.842105	0.307692	0.534413
1H	495005788	C	T	0,5	8,0	5,52	28,14	0.912281	0.333333	0.578947
1H	495005802	C	G	0,5	11,0	5,56	31,12	0.918033	0.27907	0.638963
1H	495006149	G	C	0,7	9,0	1,44	27,9	0.977778	0.25	0.727778
1H	495006564	C	T	7,0	0,7	33,0	5,17	1	0.227273	0.772727
1H	495006590	C	A	0,9	12,0	0,30	18,3	1	0.142857	0.857143
1H	495006592	A	G	0,9	12,0	0,30	17,3	1	0.15	0.85
1H	495006796	C	T	7,0	0,6	46,0	10,17	1	0.37037	0.62963
1H	495006797	G	A	0,7	7,0	0,46	17,10	1	0.37037	0.62963
1H	495006800	T	C	8,0	0,6	46,0	10,17	1	0.37037	0.62963
1H	495007004	T	C	10,0	0,7	49,7	12,23	0.875	0.342857	0.532143
1H	495007357	G	A	14,0	0,10	35,2	7,20	0.945946	0.259259	0.686687
1H	495007365	C	T	0,13	6,0	2,35	20,6	0.945946	0.230769	0.715177
1H	495007709	A	T	0,9	6,0	3,44	21,19	0.93617	0.475	0.46117
1H	495007761	A	G	5,0	0,5	49,2	16,23	0.960784	0.410256	0.550528
1H	495007897	A	G	0,6	14,0	5,48	21,15	0.90566	0.416667	0.488994
1H	495007952	T	G	0,7	15,0	5,50	17,15	0.909091	0.46875	0.440341
1H	495008188	T	A	0,6	7,0	3,62	23,12	0.953846	0.342857	0.610989
1H	495008672	A	AG	13,0	0,8	26,0	9,11	1	0.45	0.55
1H	495008678	T	G	0,14	7,0	0,26	13,9	1	0.409091	0.590909
1H	495008679	G	T	0,14	7,0	0,26	13,9	1	0.409091	0.590909
1H	495008699	T	C	0,13	13,0	0,29	22,8	1	0.266667	0.733333
1H	495008704	C	A	14,0	0,11	31,0	7,22	1	0.241379	0.758621
1H	495008827	G	A	0,6	6,0	4,35	33,6	0.897436	0.153846	0.74359
1H	495008828	T	C	0,6	6,0	4,35	33,6	0.897436	0.153846	0.74359
1H	495008981	G	A	13,0	0,12	47,0	6,18	1	0.25	0.75
1H	495009109	CAAATTGATTCGTCTGG	C	10,0	0,8	54,0	3,16	1	0.157895	0.842105
1H	495009206	C	CA	0,7	8,0	3,45	24,0	0.9375	0	0.9375
1H	495015417	C	T	0,17	11,0	8,74	27,14	0.902439	0.341463	0.560976
1H	495015484	AT	A	28,0	0,9	65,11	11,23	0.855263	0.323529	0.531734
1H	495015578	C	G	1,22	6,0	13,47	15,11	0.783333	0.423077	0.360256
1H	495016618	G	A	0,7	6,0	1,30	24,7	0.967742	0.225806	0.741935
1H	495017341	A	G	11,0	0,6	35,4	9,15	0.897436	0.375	0.522436
1H	495018074	G	A	8,0	0,12	53,4	4,14	0.929825	0.222222	0.707602
1H	495021632	C	A	7,0	0,5	54,4	12,21	0.931034	0.363636	0.567398
1H	495023084	GC	G	0,13	6,0	9,65	14,7	0.878378	0.333333	0.545045
1H	495023094	G	T	13,0	0,6	66,9	7,15	0.88	0.318182	0.561818
1H	495023221	G	A	0,11	9,0	11,46	14,9	0.807018	0.391304	0.415713
1H	495023424	G	A	0,8	10,0	5,30	21,5	0.857143	0.192308	0.664835
1H	495023468	T	C	8,0	0,10	33,4	7,24	0.891892	0.225806	0.666085
1H	495023593	C	A	0,7	11,0	3,50	20,13	0.943396	0.393939	0.549457
1H	495025308	C	CGGTGGTTTGGCT	0,5	5,0	0,24	14,6	1	0.3	0.7
1H	495025311	A	ACCT	0,5	5,0	0,22	16,8	1	0.333333	0.666667
1H	495025698	A	G	6,0	0,8	46,5	4,18	0.901961	0.181818	0.720143
1H	495025772	C	G	6,0	0,9	44,3	6,20	0.93617	0.230769	0.705401
1H	495025782	C	A	0,5	9,0	4,47	21,7	0.921569	0.25	0.671569
1H	495025851	C	T	0,8	5,0	4,31	25,8	0.885714	0.242424	0.64329
1H	495026032	G	A	0,12	6,0	3,30	20,5	0.909091	0.2	0.709091
1H	495026122	G	A	11,0	0,5	27,6	6,15	0.818182	0.285714	0.532468
1H	495026136	C	T	9,0	0,6	28,7	4,11	0.8	0.266667	0.533333
1H	495026681	T	C	0,5	6,0	2,39	17,7	0.95122	0.291667	0.659553
1H	495026687	T	C	0,5	6,0	2,41	17,7	0.953488	0.291667	0.661822
1H	495026694	T	TA	0,5	6,0	2,41	17,7	0.953488	0.291667	0.661822
1H	495028077	CAGTGA	C	0,8	6,0	7,24	20,5	0.774194	0.2	0.574194
1H	495028086	T	TCA	0,8	6,0	5,26	21,5	0.83871	0.192308	0.646402
1H	495028410	TG	T	18,0	0,16	44,5	20,33	0.897959	0.377358	0.520601
1H	495028413	A	T	18,0	0,14	44,5	19,33	0.897959	0.365385	0.532575
1H	495028430	C	A	0,15	16,0	6,37	34,21	0.860465	0.381818	0.478647
1H	495028476	A	G	16,0	0,15	40,5	13,31	0.888889	0.295455	0.593434
1H	495028505	T	C	22,0	0,13	44,6	10,28	0.88	0.263158	0.616842
1H	495028650	C	T	21,0	0,14	50,7	5,19	0.877193	0.208333	0.66886
1H	495029347	A	T	0,11	9,0	5,63	21,11	0.926471	0.34375	0.582721
1H	495029395	A	T	0,7	10,0	5,64	17,11	0.927536	0.392857	0.534679
1H	495029451	T	G	6,0	0,9	59,8	8,20	0.880597	0.285714	0.594883
1H	495029459	A	G	6,0	0,9	55,8	8,18	0.873016	0.307692	0.565324
1H	495033365	A	C	0,6	10,0	3,42	21,3	0.933333	0.125	0.808333
1H	495033442	T	C	9,0	0,13	47,3	5,26	0.94	0.16129	0.77871
1H	495033491	G	A	0,12	12,0	3,49	26,4	0.942308	0.133333	0.808974
1H	495033503	A	G	11,0	0,12	50,3	6,28	0.943396	0.176471	0.766926
1H	495033585	A	C	9,0	0,9	70,2	6,29	0.972222	0.171429	0.800794
1H	495033647	A	G	8,0	0,7	54,0	8,25	1	0.242424	0.757576
1H	495033698	G	A	8,0	0,7	46,2	7,22	0.958333	0.241379	0.716954
1H	495033763	AT	A	10,0	0,5	44,3	3,16	0.93617	0.157895	0.778275
1H	495033802	G	A	11,0	0,5	41,3	1,17	0.931818	0.0555556	0.876263
1H	495033952	A	C	6,0	0,5	34,0	4,11	1	0.266667	0.733333
1H	495034168	C	T	12,0	0,9	44,5	6,11	0.897959	0.352941	0.545018
1H	495034187	T	C	0,9	11,0	4,46	12,7	0.92	0.368421	0.551579
1H	495034209	T	C	0,10	12,0	5,47	12,8	0.903846	0.4	0.503846
1H	495034255	C	T	8,0	0,9	34,5	9,13	0.871795	0.409091	0.462704
1H	495034395	C	G	0,6	8,0	1,40	16,18	0.97561	0.529412	0.446198
1H	495034661	C	T	0,5	8,0	2,24	15,8	0.923077	0.347826	0.575251
1H	495034766	C	G	5,0	0,7	31,4	4,18	0.885714	0.181818	0.703896
1H	495034901	G	A	0,6	5,0	4,32	15,2	0.888889	0.117647	0.771242
1H	495034902	C	G	0,6	5,0	4,34	15,2	0.894737	0.117647	0.77709
1H	495034931	T	A	0,8	7,0	5,38	15,3	0.883721	0.166667	0.717054
1H	495035061	C	A	0,8	9,0	3,37	20,7	0.925	0.259259	0.665741
1H	495035062	C	A	0,8	9,0	3,37	20,7	0.925	0.259259	0.665741
1H	495035063	C	T	0,8	9,0	3,37	21,7	0.925	0.25	0.675
1H	495035082	A	C	8,0	0,9	39,2	6,19	0.95122	0.24	0.71122
1H	495035207	A	G	0,5	11,0	3,34	11,7	0.918919	0.388889	0.53003
1H	495035291	C	A	9,0	0,7	31,4	9,10	0.885714	0.473684	0.41203
1H	495035631	G	T	0,11	7,0	3,41	20,6	0.931818	0.230769	0.701049
1H	495035641	A	G	0,11	7,0	4,39	20,6	0.906977	0.230769	0.676208
1H	495035648	G	C	13,0	0,7	44,5	6,21	0.897959	0.222222	0.675737
1H	495035667	T	A	13,0	0,8	45,5	3,22	0.9	0.12	0.78
1H	495035693	G	C	0,12	11,0	4,45	18,5	0.918367	0.217391	0.700976
1H	495035830	G	A	7,0	0,7	39,2	9,15	0.95122	0.375	0.57622
1H	495037789	C	A	6,0	0,10	38,0	7,26	1	0.212121	0.787879
1H	495037831	A	G	6,0	0,9	38,0	8,20	1	0.285714	0.714286
1H	495037844	C	T	0,7	8,0	0,35	21,9	1	0.3	0.7
1H	495037853	T	C	0,7	5,0	0,33	19,9	1	0.321429	0.678571
1H	495037926	C	T	0,5	5,0	1,25	15,7	0.961538	0.318182	0.643357
1H	495037936	G	A	0,5	7,0	1,25	17,9	0.961538	0.346154	0.615385
1H	495038013	T	G	7,0	0,9	32,2	11,18	0.941176	0.37931	0.561866
1H	495040714	G	A	5,0	0,6	31,2	6,13	0.939394	0.315789	0.623604
1H	495045199	G	A	1,5	7,0	12,24	6,6	0.666667	0.5	0.166667
1H	495045241	C	G	7,1	0,5	22,9	5,6	0.709677	0.454545	0.255132
1H	495045329	GC	G	0,5	7,0	6,20	11,7	0.769231	0.388889	0.380342
1H	495045331	G	T	0,5	7,0	6,20	10,7	0.769231	0.411765	0.357466
1H	495045379	T	A	6,0	0,11	28,4	6,12	0.875	0.333333	0.541667
1H	495045390	G	A	6,0	0,10	28,4	7,13	0.875	0.35	0.525
1H	495046012	TA	T	0,12	6,0	3,55	17,7	0.948276	0.291667	0.656609
1H	495046611	G	T	0,14	6,0	2,57	17,4	0.966102	0.190476	0.775626
1H	495046706	A	G	0,7	5,0	1,27	13,2	0.964286	0.133333	0.830952
1H	495046793	G	A	6,0	0,5	22,0	5,9	1	0.357143	0.642857
1H	495046804	A	G	6,0	0,6	22,0	5,9	1	0.357143	0.642857
1H	495046832	A	G	8,0	0,5	16,1	6,9	0.941176	0.4	0.541176
1H	495047259	G	A	7,0	0,7	30,0	0,13	1	0	1
1H	495047271	G	T	8,0	0,7	28,0	0,12	1	0	1
1H	495047273	C	T	8,0	0,7	28,0	0,12	1	0	1
1H	495047283	A	G	9,0	0,5	31,0	0,12	1	0	1
1H	495047301	G	A	8,0	0,5	29,0	0,11	1	0	1
1H	495047342	G	T	0,6	5,0	0,22	12,0	1	0	1
1H	495047570	G	T	10,0	0,5	30,3	2,11	0.909091	0.153846	0.755245
1H	495047586	C	T	10,0	0,5	31,3	2,11	0.911765	0.153846	0.757919
1H	495047588	G	A	10,0	0,5	31,3	2,10	0.911765	0.166667	0.745098
1H	495047633	C	T	11,0	1,6	25,4	1,10	0.862069	0.0909091	0.77116
1H	495047830	G	T	0,12	7,0	4,30	13,4	0.882353	0.235294	0.647059
1H	495047891	G	A	0,9	6,0	3,29	10,5	0.90625	0.333333	0.572917
1H	495047901	C	A	8,0	0,6	31,3	6,9	0.911765	0.4	0.511765
1H	495047924	C	A	7,0	0,6	23,2	6,10	0.92	0.375	0.545
1H	495047925	A	C	7,0	0,6	23,2	6,10	0.92	0.375	0.545
1H	495053137	C	G	5,0	0,5	38,0	4,14	1	0.222222	0.777778
1H	495054544	G	A	5,0	1,5	47,0	19,15	1	0.558824	0.441176
1H	495054983	A	G	7,0	0,6	38,4	11,17	0.904762	0.392857	0.511905
1H	495055076	G	T	0,5	6,0	6,34	18,7	0.85	0.28	0.57
1H	495055345	T	C	8,0	0,6	41,0	8,6	1	0.571429	0.428571
1H	495055567	A	T	0,7	7,0	12,46	12,6	0.793103	0.333333	0.45977
1H	495055578	A	G	6,0	0,6	47,12	9,11	0.79661	0.45	0.34661
1H	495055609	T	C	0,5	6,0	10,48	13,8	0.827586	0.380952	0.446634
1H	495055815	A	T	0,7	5,0	0,53	8,5	1	0.384615	0.615385
1H	495055827	C	T	8,0	0,6	42,0	6,8	1	0.428571	0.571429
1H	495055914	G	T	6,0	0,7	29,0	8,10	1	0.444444	0.555556
1H	495060706	T	C	0,8	5,0	3,28	11,5	0.903226	0.3125	0.590726
1H	495079229	G	T	0,8	6,0	1,29	15,4	0.966667	0.210526	0.75614
1H	495082508	C	T	0,5	13,0	0,38	17,9	1	0.346154	0.653846
1H	495082513	G	A	0,6	13,0	0,36	16,9	1	0.36	0.64
1H	495084834	G	T	0,7	10,0	1,54	11,5	0.981818	0.3125	0.669318
1H	495084849	G	A	0,5	9,0	1,56	14,5	0.982456	0.263158	0.719298
1H	495084856	G	A	0,6	9,0	1,54	14,5	0.981818	0.263158	0.71866
1H	495084868	A	G	5,0	0,8	50,0	4,11	1	0.266667	0.733333
1H	495085079	A	C	6,0	1,4	38,0	7,12	1	0.368421	0.631579
1H	495086533	T	C	5,0	0,7	27,0	11,19	1	0.366667	0.633333
1H	495088158	AGGC	A	0,6	5,0	0,14	15,0	1	0	1
1H	495088162	AACAACAACTAGCGCAG	A	0,6	5,0	0,14	17,0	1	0	1
1H	495088752	A	C	5,0	0,10	66,0	8,12	1	0.4	0.6
1H	495088884	C	G	10,0	0,8	65,3	9,15	0.955882	0.375	0.580882
1H	495088901	T	G	11,0	0,9	63,6	7,17	0.913043	0.291667	0.621377
1H	495088917	T	C	11,0	0,10	65,6	9,20	0.915493	0.310345	0.605148
1H	495089028	C	T	9,0	0,9	41,6	6,20	0.87234	0.230769	0.641571
1H	495089030	AT	A	9,0	0,9	39,6	7,20	0.866667	0.259259	0.607407
1H	495089041	AG	A	8,0	0,7	41,5	10,20	0.891304	0.333333	0.557971
1H	495089114	T	A	0,8	6,0	1,43	15,11	0.977273	0.423077	0.554196
1H	495089194	C	T	0,6	7,0	1,43	18,10	0.977273	0.357143	0.62013
1H	495089217	A	G	0,7	8,0	1,40	19,9	0.97561	0.321429	0.654181
1H	495089241	G	A	6,0	0,7	47,1	11,30	0.979167	0.268293	0.710874
1H	495090391	G	A	20,0	0,5	53,0	2,11	1	0.153846	0.846154
1H	495090449	G	T	0,18	10,0	5,50	11,2	0.909091	0.153846	0.755245
1H	495090470	G	T	22,0	0,5	53,1	3,15	0.981481	0.166667	0.814815
1H	495090477	C	G	0,19	6,0	1,52	16,3	0.981132	0.157895	0.823237
1H	495090518	T	G	21,0	0,7	60,3	4,14	0.952381	0.222222	0.730159
1H	495091085	A	C	6,0	0,8	28,2	5,21	0.933333	0.192308	0.741026
1H	495091152	T	C	7,0	0,8	31,0	7,17	1	0.291667	0.708333
1H	495091461	T	A	8,0	0,6	38,10	12,29	0.791667	0.292683	0.498984
1H	495091500	T	C	0,9	7,0	10,33	28,10	0.767442	0.263158	0.504284
1H	495091513	A	C	10,0	0,7	30,8	10,30	0.789474	0.25	0.539474
1H	495091547	C	T	8,0	0,7	28,6	9,25	0.823529	0.264706	0.558824
1H	495093242	G	C	11,0	0,6	42,6	5,17	0.875	0.227273	0.647727
1H	495093243	G	A	11,0	0,6	42,6	5,17	0.875	0.227273	0.647727
1H	495093368	G	A	0,9	9,0	8,50	9,5	0.862069	0.357143	0.504926
1H	495093392	C	G	0,9	7,0	5,45	8,5	0.9	0.384615	0.515385
1H	495093607	T	A	5,0	0,5	26,6	7,20	0.8125	0.259259	0.553241
1H	495093992	G	T	0,10	5,0	6,58	17,14	0.90625	0.451613	0.454637
1H	495093994	G	T	10,0	0,5	59,6	14,18	0.907692	0.4375	0.470192
1H	495094061	C	T	8,0	0,5	55,3	14,16	0.948276	0.466667	0.481609
1H	495094075	C	A	0,8	6,0	2,49	14,14	0.960784	0.5	0.460784
1H	495094090	C	T	0,6	6,0	2,51	14,15	0.962264	0.517241	0.445023
1H	495094106	G	A	0,6	7,0	1,46	13,15	0.978723	0.535714	0.443009
1H	495094137	G	T	0,5	6,0	0,40	10,11	1	0.52381	0.47619
1H	495095326	G	T	0,7	14,0	4,44	26,5	0.916667	0.16129	0.755376
1H	495095739	G	A	0,5	6,0	6,38	20,9	0.863636	0.310345	0.553292
1H	495095995	A	G	8,0	0,8	54,0	3,22	1	0.12	0.88
1H	495096413	G	A	5,0	0,8	32,5	16,14	0.864865	0.533333	0.331532
1H	495096480	T	C	10,0	0,7	39,9	13,20	0.8125	0.393939	0.418561
1H	495096489	A	C	10,0	0,7	42,9	13,20	0.823529	0.393939	0.42959
1H	495096507	G	A	0,10	5,0	8,46	23,13	0.851852	0.361111	0.490741
1H	495096709	AC	A	1,6	9,0	21,46	24,9	0.686567	0.272727	0.41384
1H	495097317	G	C	7,0	0,6	27,3	10,14	0.9	0.416667	0.483333
1H	495097472	G	A	6,0	0,9	39,2	7,23	0.95122	0.233333	0.717886
1H	495097515	C	T	0,7	7,0	2,56	27,10	0.965517	0.27027	0.695247
1H	495097553	G	A	0,7	5,0	2,52	20,10	0.962963	0.333333	0.62963
1H	495097594	T	C	0,10	8,0	0,55	24,11	1	0.314286	0.685714
1H	495097643	G	A	0,9	8,0	0,46	24,12	1	0.333333	0.666667
1H	495097698	G	C	6,0	0,7	46,2	7,24	0.958333	0.225806	0.732527
1H	495097978	G	T	0,5	11,0	2,46	23,11	0.958333	0.323529	0.634804
1H	495098063	G	T	6,0	0,10	60,2	13,30	0.967742	0.302326	0.665416
1H	495098065	C	T	0,5	11,0	2,61	30,13	0.968254	0.302326	0.665928
1H	495098192	G	A	11,0	0,9	56,4	13,23	0.933333	0.361111	0.572222
1H	495098343	T	C	0,12	15,0	2,53	26,9	0.963636	0.257143	0.706494
1H	495098365	C	G	0,11	13,0	2,49	26,10	0.960784	0.277778	0.683007
1H	495098410	T	A	18,0	0,13	49,0	12,28	1	0.3	0.7
1H	495098427	G	A	11,0	0,11	57,0	15,32	1	0.319149	0.680851
1H	495098467	C	G	0,11	15,0	1,53	26,15	0.981481	0.365854	0.615628
1H	495098736	CA	C	0,10	10,0	3,51	22,7	0.944444	0.241379	0.703065
1H	495098749	G	C	0,9	11,0	4,46	24,8	0.92	0.25	0.67
1H	495098753	A	G	0,9	11,0	4,48	25,8	0.923077	0.242424	0.680653
1H	495098813	C	G	0,11	6,0	3,45	25,8	0.9375	0.242424	0.695076
1H	495098888	A	G	0,7	5,0	5,44	26,7	0.897959	0.212121	0.685838
1H	495099953	T	C	13,0	0,12	44,4	17,25	0.916667	0.404762	0.511905
1H	495100266	TA	T	0,10	7,0	5,35	20,12	0.875	0.375	0.5
1H	495100553	G	A	0,7	5,0	2,41	11,7	0.953488	0.388889	0.564599
1H	495101156	T	G	0,6	8,0	4,44	15,8	0.916667	0.347826	0.568841
1H	495103335	C	T	0,6	9,0	0,52	6,11	1	0.647059	0.352941
1H	495106350	A	AT	0,5	11,0	3,30	14,2	0.909091	0.125	0.784091
1H	495106414	TTG	T	0,7	10,0	4,39	11,11	0.906977	0.5	0.406977
1H	495106418	G	A	0,6	9,0	5,40	11,12	0.888889	0.521739	0.36715
1H	495106491	G	T	8,0	0,5	41,6	13,7	0.87234	0.65	0.22234
1H	495106610	A	T	0,7	8,0	3,42	11,15	0.933333	0.576923	0.35641
1H	495106644	C	T	6,0	0,10	36,7	14,12	0.837209	0.538462	0.298748
1H	495106684	A	G	0,9	9,0	8,38	10,12	0.826087	0.545455	0.280632
1H	495106693	A	G	0,10	9,0	7,38	9,10	0.844444	0.526316	0.318129
1H	495106723	T	C	0,10	8,0	9,36	9,11	0.8	0.55	0.25
1H	495106738	T	C	0,9	8,0	10,33	9,13	0.767442	0.590909	0.176533
1H	495106809	C	T	11,0	0,8	43,9	10,12	0.826923	0.454545	0.372378
1H	495106829	A	G	0,9	10,0	8,44	11,8	0.846154	0.421053	0.425101
1H	495106849	C	A	7,0	0,10	45,9	8,12	0.833333	0.4	0.433333
1H	495107020	T	C	0,11	6,0	7,39	12,13	0.847826	0.52	0.327826
1H	495107022	T	C	12,0	0,6	42,7	13,12	0.857143	0.52	0.337143
1H	495107023	C	T	0,11	6,0	7,42	12,13	0.857143	0.52	0.337143
1H	495107077	C	T	7,0	0,6	55,0	12,13	1	0.48	0.52
1H	495109254	G	A	1,5	5,0	2,39	8,6	0.95122	0.428571	0.522648
1H	495109278	T	G	1,7	5,0	2,43	9,9	0.955556	0.5	0.455556
1H	495109867	T	TC	9,0	0,9	55,5	8,12	0.916667	0.4	0.516667
1H	495110260	C	T	0,7	12,0	1,39	18,9	0.975	0.333333	0.641667
1H	495110692	A	C	0,11	6,0	7,53	19,10	0.883333	0.344828	0.538506
1H	495110707	G	A	12,0	0,6	49,3	9,19	0.942308	0.321429	0.620879
1H	495110760	C	T	13,0	0,5	56,0	11,17	1	0.392857	0.607143
1H	495111306	T	TC	13,0	1,5	50,0	2,17	1	0.105263	0.894737
1H	495111641	T	C	8,0	0,8	33,7	8,11	0.825	0.421053	0.403947
1H	495111695	G	A	10,0	0,9	30,6	8,9	0.833333	0.470588	0.362745
1H	495111729	G	A	0,6	9,0	4,26	8,9	0.866667	0.529412	0.337255
1H	495111816	G	A	0,12	6,0	2,31	7,10	0.939394	0.588235	0.351159
1H	495111867	C	G	0,14	5,0	2,29	8,6	0.935484	0.428571	0.506912
1H	495111908	C	T	0,9	6,0	0,31	9,4	1	0.307692	0.692308
1H	495111942	G	T	0,8	8,0	2,35	9,5	0.945946	0.357143	0.588803
1H	495111956	A	C	0,7	8,0	2,33	10,5	0.942857	0.333333	0.609524
1H	495112002	T	G	0,5	6,0	3,28	8,3	0.903226	0.272727	0.630499
1H	495112287	A	T	0,9	5,0	1,42	14,5	0.976744	0.263158	0.713586
1H	495112288	A	T	0,9	5,0	1,42	15,4	0.976744	0.210526	0.766218
1H	495112388	C	T	8,0	0,6	29,2	5,13	0.935484	0.277778	0.657706
1H	495112464	C	G	0,6	7,0	5,24	12,4	0.827586	0.25	0.577586
1H	495112697	G	T	8,0	0,13	24,3	8,12	0.888889	0.4	0.488889
1H	495112944	A	T	5,0	0,17	70,3	10,18	0.958904	0.357143	0.601761
1H	495112964	G	T	0,7	16,0	4,68	17,10	0.944444	0.37037	0.574074
1H	495112988	A	G	0,7	16,0	4,63	21,9	0.940299	0.3	0.640299
1H	495113009	A	C	0,12	14,0	3,57	21,8	0.95	0.275862	0.674138
1H	495113069	G	A	0,15	16,0	3,54	17,9	0.947368	0.346154	0.601215
1H	495113346	C	A	0,8	7,0	0,41	13,6	1	0.315789	0.684211
1H	495113502	G	T	5,0	0,8	47,0	8,16	1	0.333333	0.666667
1H	495117990	G	A	0,6	9,0	3,25	19,4	0.892857	0.173913	0.718944
1H	495117991	G	T	0,6	9,0	3,25	18,4	0.892857	0.181818	0.711039
1H	495118171	C	CTA	5,0	0,8	35,2	6,14	0.945946	0.3	0.645946
1H	495118528	G	T	0,6	21,0	10,39	24,6	0.795918	0.2	0.595918
1H	495118560	G	A	0,7	20,0	9,43	22,10	0.826923	0.3125	0.514423
1H	495118901	G	C	0,12	16,0	10,43	27,13	0.811321	0.325	0.486321
1H	495118984	G	GT	0,10	21,0	11,47	41,10	0.810345	0.196078	0.614266
1H	495119007	G	A	0,9	21,0	11,48	46,12	0.813559	0.206897	0.606663
1H	495119192	T	C	0,9	20,0	0,32	37,6	1	0.139535	0.860465
1H	495119769	G	A	0,5	6,0	4,28	24,0	0.875	0	0.875
1H	495127589	G	A	6,0	0,6	39,4	8,6	0.906977	0.571429	0.335548
1H	495127603	G	C	5,0	0,6	36,4	8,7	0.9	0.533333	0.366667
1H	495129606	G	A	0,8	7,0	2,42	18,7	0.954545	0.28	0.674545
1H	495129686	C	T	9,0	0,7	53,2	4,14	0.963636	0.222222	0.741414
1H	495129774	C	T	5,0	0,5	49,0	3,9	1	0.25	0.75
1H	495129987	A	G	5,0	0,5	40,0	5,9	1	0.357143	0.642857
1H	495130012	G	T	0,5	5,0	0,42	12,4	1	0.25	0.75
1H	495131266	C	G	7,0	0,6	46,5	6,14	0.901961	0.3	0.601961
1H	495131406	G	T	7,0	1,5	40,6	7,13	0.869565	0.35	0.519565
1H	495131416	C	T	9,0	1,4	42,7	7,13	0.857143	0.35	0.507143
1H	495131493	C	T	0,7	6,0	12,47	15,4	0.79661	0.210526	0.586084
1H	495131950	G	T	9,0	0,5	39,0	9,16	1	0.36	0.64
1H	495132020	T	C	0,7	7,0	2,58	19,0	0.966667	0	0.966667
1H	495132055	C	T	0,6	7,0	3,56	22,2	0.949153	0.0833333	0.865819
1H	495132196	C	T	0,6	6,0	6,51	13,6	0.894737	0.315789	0.578947
1H	495132611	C	T	7,0	0,6	37,2	11,26	0.948718	0.297297	0.651421
1H	495132679	A	C	0,8	7,0	3,36	17,6	0.923077	0.26087	0.662207
1H	495132796	C	A	0,6	7,0	3,45	20,9	0.9375	0.310345	0.627155
1H	495132799	C	A	0,5	8,0	3,46	20,8	0.938776	0.285714	0.653061
1H	495133559	T	C	9,0	0,8	50,0	15,30	1	0.333333	0.666667
1H	495133605	C	G	0,7	6,0	2,58	27,14	0.966667	0.341463	0.625203
1H	495133607	C	T	0,7	6,0	2,58	27,13	0.966667	0.325	0.641667
1H	495133660	G	A	8,0	0,7	59,0	12,29	1	0.292683	0.707317
1H	495133702	G	T	0,7	5,0	2,65	27,7	0.970149	0.205882	0.764267
1H	495133775	C	T	5,0	0,6	50,0	10,27	1	0.27027	0.72973
1H	495133880	C	A	5,0	0,10	47,7	10,29	0.87037	0.25641	0.61396
1H	495134182	C	T	0,6	11,0	4,50	23,8	0.925926	0.258065	0.667861
1H	495134195	C	A	7,0	0,11	48,4	8,19	0.923077	0.296296	0.626781
1H	495134203	A	T	7,0	0,11	47,4	9,20	0.921569	0.310345	0.611224
1H	495134216	A	G	0,7	11,0	4,51	17,9	0.927273	0.346154	0.581119
1H	495134229	A	G	0,7	10,0	3,50	18,9	0.943396	0.333333	0.610063
1H	495134430	A	G	0,6	7,0	2,40	19,10	0.952381	0.344828	0.607553
1H	495134582	G	A	0,8	12,0	7,39	26,7	0.847826	0.212121	0.635705
1H	495134728	G	C	0,6	10,0	4,34	20,8	0.894737	0.285714	0.609023
1H	495134731	C	T	6,0	0,8	39,0	9,18	1	0.333333	0.666667
1H	495134742	C	T	0,6	9,0	4,30	19,7	0.882353	0.269231	0.613122
1H	495135003	C	T	0,8	5,0	25,40	27,14	0.615385	0.341463	0.273921
1H	495135060	T	C	0,6	6,0	18,46	23,12	0.71875	0.342857	0.375893
1H	495135262	C	A	9,0	0,7	30,2	7,21	0.9375	0.25	0.6875
1H	495135314	G	A	8,0	0,6	25,0	7,22	1	0.241379	0.758621
1H	495136895	T	C	0,5	5,0	2,29	11,5	0.935484	0.3125	0.622984
1H	495137891	C	T	5,0	0,6	40,0	13,7	1	0.65	0.35
1H	495137916	G	T	0,5	5,0	0,39	5,12	1	0.705882	0.294118
1H	495145241	A	G	0,5	9,0	3,36	14,13	0.923077	0.481481	0.441595
1H	495145272	G	A	7,0	0,10	33,3	12,19	0.916667	0.387097	0.52957
1H	495145827	A	G	5,0	0,10	21,3	1,22	0.875	0.0434783	0.831522
1H	495146299	C	T	5,0	0,6	46,10	7,20	0.821429	0.259259	0.562169
1H	495146457	G	A	16,0	0,8	57,7	5,25	0.890625	0.166667	0.723958
1H	495146508	C	T	0,15	10,0	4,62	29,5	0.939394	0.147059	0.792335
1H	495146527	A	G	0,12	12,0	4,63	28,6	0.940299	0.176471	0.763828
1H	495146532	G	A	0,12	13,0	5,62	25,6	0.925373	0.193548	0.731825
1H	495146613	T	C	0,12	10,0	5,40	21,6	0.888889	0.222222	0.666667
1H	495146754	T	C	10,0	0,9	28,3	5,13	0.903226	0.277778	0.625448
1H	495147562	C	A	0,10	10,0	4,40	22,9	0.909091	0.290323	0.618768
1H	495147780	G	T	6,0	0,5	35,8	8,23	0.813953	0.258065	0.555889
1H	495147797	G	C	6,0	0,6	33,8	9,26	0.804878	0.257143	0.547735
1H	495147965	G	A	5,0	0,10	40,5	8,17	0.888889	0.32	0.568889
1H	495147989	A	G	6,0	0,8	41,5	9,19	0.891304	0.321429	0.569876
1H	495148145	G	A	0,6	6,0	1,55	13,8	0.982143	0.380952	0.60119
1H	495177788	A	G	14,0	0,5	53,7	9,11	0.883333	0.45	0.433333
1H	495182981	C	T	5,0	0,8	42,3	17,15	0.933333	0.53125	0.402083
1H	495200713	C	T	17,0	0,6	54,4	9,23	0.931034	0.28125	0.649784
1H	495203157	T	A	0,7	9,0	5,43	26,10	0.895833	0.277778	0.618056
1H	495234273	C	G	10,0	0,5	47,0	7,13	1	0.35	0.65
1H	495241449	A	T	6,0	0,8	36,9	8,15	0.8	0.347826	0.452174
1H	495271182	G	T	0,10	11,0	4,71	10,12	0.946667	0.545455	0.401212
1H	495273678	G	A	12,3	0,7	20,39	10,28	0.338983	0.263158	0.0758252
1H	495279461	G	C	11,0	1,6	53,17	35,11	0.757143	0.76087	-0.00372671
1H	495279489	A	G	8,0	1,6	64,24	34,13	0.727273	0.723404	0.00386847
1H	495279503	A	G	9,0	0,6	65,23	32,14	0.738636	0.695652	0.0429842
1H	495279526	A	G	7,0	0,5	65,26	36,16	0.714286	0.692308	0.021978
1H	495279527	C	T	9,0	0,5	65,26	36,16	0.714286	0.692308	0.021978
1H	495296169	C	T	7,0	0,5	53,8	13,23	0.868852	0.361111	0.507741
1H	495311902	G	A	0,13	7,0	3,73	29,6	0.960526	0.171429	0.789098
1H	495311932	C	T	0,14	6,0	2,66	25,9	0.970588	0.264706	0.705882
1H	495311954	A	G	0,15	5,0	3,62	23,8	0.953846	0.258065	0.695782
1H	495311963	A	G	0,14	5,0	3,59	20,8	0.951613	0.285714	0.665899
1H	495321269	G	GAAAAAAAGA	0,7	11,0	4,24	18,8	0.857143	0.307692	0.549451
1H	495321276	T	G	0,7	12,0	4,23	18,10	0.851852	0.357143	0.494709
1H	495321279	G	A	0,7	12,0	4,21	18,10	0.84	0.357143	0.482857
1H	495322516	A	T	0,6	8,0	2,31	10,4	0.939394	0.285714	0.65368
1H	495322582	G	C	0,5	6,0	3,26	10,6	0.896552	0.375	0.521552
1H	495322592	TG	T	0,6	7,0	5,29	10,6	0.852941	0.375	0.477941
1H	495322610	CTAG	C	0,6	6,0	4,28	11,6	0.875	0.352941	0.522059
1H	495322618	G	A	0,7	5,0	4,28	11,7	0.875	0.388889	0.486111
1H	495322627	GAAAA	G	0,6	5,0	4,27	11,7	0.870968	0.388889	0.482079
1H	495323344	G	GA	0,5	6,0	5,31	14,6	0.861111	0.3	0.561111
1H	495323354	A	T	0,5	6,0	5,31	15,6	0.861111	0.285714	0.575397
1H	495323369	T	G	0,6	10,0	4,33	19,5	0.891892	0.208333	0.683559
1H	495323515	C	T	0,6	5,0	4,19	19,7	0.826087	0.269231	0.556856
1H	495323577	A	T	0,9	6,0	2,23	19,12	0.92	0.387097	0.532903
1H	495323759	C	T	0,12	5,0	5,38	26,15	0.883721	0.365854	0.517867
1H	495324179	GT	G	0,11	5,0	4,57	23,14	0.934426	0.378378	0.556048
1H	495324181	T	C	0,11	5,0	4,57	23,14	0.934426	0.378378	0.556048
1H	495324639	C	G	0,7	8,0	3,61	15,15	0.953125	0.5	0.453125
1H	495324813	A	G	0,8	6,0	3,70	33,15	0.958904	0.3125	0.646404
1H	495324929	T	C	0,6	6,0	5,36	37,17	0.878049	0.314815	0.563234
1H	495324935	C	T	0,6	6,0	5,37	36,17	0.880952	0.320755	0.560198
1H	495325088	C	G	0,5	5,0	3,41	23,11	0.931818	0.323529	0.608289
1H	495325342	T	G	0,7	6,0	3,54	26,12	0.947368	0.315789	0.631579
1H	495325414	C	T	0,10	6,0	4,63	16,11	0.940299	0.407407	0.532891
1H	495325419	T	C	0,10	6,0	4,65	16,11	0.942029	0.407407	0.534622
1H	495325496	C	T	0,8	6,0	5,55	15,5	0.916667	0.25	0.666667
1H	495325503	A	G	0,8	6,0	5,55	16,5	0.916667	0.238095	0.678571
1H	495325635	C	A	0,6	15,0	2,47	14,11	0.959184	0.44	0.519184
1H	495326481	G	A	0,18	13,0	3,103	21,28	0.971698	0.571429	0.40027
1H	495326492	A	G	0,17	10,0	3,100	24,32	0.970874	0.571429	0.399445
1H	495326544	A	C	0,15	14,0	8,88	21,32	0.916667	0.603774	0.312893
1H	495326547	C	T	0,15	14,0	8,89	21,31	0.917526	0.596154	0.321372
1H	495328591	A	C	0,6	10,0	4,33	14,8	0.891892	0.363636	0.528256
1H	495328762	C	T	0,18	8,0	6,47	17,7	0.886792	0.291667	0.595126
1H	495329117	T	C	0,8	6,0	0,38	40,18	1	0.310345	0.689655
1H	495329428	A	T	0,8	5,0	6,38	19,7	0.863636	0.269231	0.594406
1H	495329577	C	T	0,6	5,0	3,37	18,13	0.925	0.419355	0.505645
1H	495329626	T	G	0,9	7,0	2,46	20,12	0.958333	0.375	0.583333
1H	495329627	G	C	0,9	7,0	2,46	20,12	0.958333	0.375	0.583333
1H	495329656	T	C	0,10	6,0	1,50	21,12	0.980392	0.363636	0.616756
1H	495329666	C	T	0,9	6,0	1,52	22,12	0.981132	0.352941	0.628191
1H	495329716	G	C	0,8	10,0	1,49	22,6	0.98	0.214286	0.765714
1H	495329722	C	T	0,8	10,0	3,49	21,5	0.942308	0.192308	0.75
1H	495329741	T	C	0,6	9,0	3,55	20,4	0.948276	0.166667	0.781609
1H	495330578	G	A	0,6	11,0	2,43	14,10	0.955556	0.416667	0.538889
1H	495330802	G	T	0,5	9,0	3,30	16,12	0.909091	0.428571	0.480519
1H	495330845	A	C	0,5	10,0	5,23	14,14	0.821429	0.5	0.321429
1H	495330868	C	G	0,5	12,0	5,33	15,15	0.868421	0.5	0.368421
1H	495330959	T	C	0,7	10,0	3,30	16,10	0.909091	0.384615	0.524476
1H	495331615	G	A	0,6	12,0	3,33	16,11	0.916667	0.407407	0.509259
1H	495331618	T	G	0,6	12,0	4,33	15,11	0.891892	0.423077	0.468815
1H	495331847	A	G	0,5	8,0	6,50	15,9	0.892857	0.375	0.517857
1H	495332228	C	T	0,6	5,0	0,53	10,12	1	0.545455	0.454545
1H	495332547	T	C	0,8	5,0	5,31	21,13	0.861111	0.382353	0.478758
1H	495332562	A	G	0,8	6,0	6,31	22,13	0.837838	0.371429	0.466409
1H	495332577	T	C	0,8	7,0	5,31	23,10	0.861111	0.30303	0.558081
1H	495332685	T	C	0,12	7,0	3,31	14,10	0.911765	0.416667	0.495098
1H	495332695	G	A	0,12	6,0	3,28	12,10	0.903226	0.454545	0.44868
1H	495332697	T	C	0,12	6,0	3,28	12,10	0.903226	0.454545	0.44868
1H	495332699	C	G	0,12	6,0	3,28	11,10	0.903226	0.47619	0.427035
1H	495332764	C	T	0,7	10,0	5,33	15,10	0.868421	0.4	0.468421
1H	495332770	CA	C	0,5	10,0	5,31	16,10	0.861111	0.384615	0.476496
1H	495332876	A	G	0,5	11,0	1,33	20,10	0.970588	0.333333	0.637255
1H	495332879	T	C	0,7	11,0	1,32	20,10	0.969697	0.333333	0.636364
1H	495332918	A	G	0,9	11,0	3,35	19,7	0.921053	0.269231	0.651822
1H	495332941	T	C	0,8	8,0	4,37	13,9	0.902439	0.409091	0.493348
1H	495332943	C	G	0,8	8,0	4,35	13,9	0.897436	0.409091	0.488345
1H	495332960	A	G	0,7	7,0	6,42	15,9	0.875	0.375	0.5
1H	495332976	T	C	0,7	7,0	7,43	18,9	0.86	0.333333	0.526667
1H	495333000	G	C	0,7	8,0	12,44	19,6	0.785714	0.24	0.545714
1H	495333022	T	G	0,6	5,0	14,41	18,8	0.745455	0.307692	0.437762
1H	495333049	T	C	0,6	5,0	14,36	17,10	0.72	0.37037	0.34963
1H	495333053	A	T	0,5	5,0	14,38	18,9	0.730769	0.333333	0.397436
1H	495333068	A	G	0,7	6,0	12,37	13,11	0.755102	0.458333	0.296769
1H	495333079	T	C	0,8	6,0	13,37	13,11	0.74	0.458333	0.281667
1H	495333081	G	C	0,8	6,0	13,37	13,11	0.74	0.458333	0.281667
1H	495333107	C	T	0,10	7,0	13,36	13,10	0.734694	0.434783	0.299911
1H	495333118	T	C	0,9	6,0	12,35	12,9	0.744681	0.428571	0.316109
1H	495333120	GT	G	0,9	6,0	11,35	12,9	0.76087	0.428571	0.332298
1H	495333135	T	C	0,9	5,0	7,36	8,9	0.837209	0.529412	0.307798
1H	495333163	A	G	0,6	5,0	6,40	6,10	0.869565	0.625	0.244565
1H	495333465	TATTA	T	0,6	10,0	6,32	11,3	0.842105	0.214286	0.62782
1H	495333474	C	T	0,6	9,0	6,31	11,3	0.837838	0.214286	0.623552
1H	495333530	G	A	0,5	9,0	4,33	10,5	0.891892	0.333333	0.558559
1H	495333531	T	C	0,5	10,0	4,34	10,5	0.894737	0.333333	0.561404
1H	495333533	T	C	0,5	10,0	4,34	10,5	0.894737	0.333333	0.561404
1H	495333554	C	G	0,6	8,0	4,37	10,5	0.902439	0.333333	0.569106
1H	495333558	C	T	0,6	11,0	4,36	8,5	0.9	0.384615	0.515385
1H	495333565	C	T	0,6	11,0	5,32	8,5	0.864865	0.384615	0.480249
1H	495333610	A	G	0,5	8,0	5,30	11,7	0.857143	0.388889	0.468254
1H	495333632	C	A	0,5	6,0	5,34	12,10	0.871795	0.454545	0.417249
1H	495333651	T	C	0,5	5,0	4,38	11,10	0.904762	0.47619	0.428571
1H	495333654	C	T	0,5	5,0	4,38	10,10	0.904762	0.5	0.404762
1H	495333664	T	G	0,5	5,0	4,39	12,12	0.906977	0.5	0.406977
1H	495333684	C	T	0,6	5,0	6,34	13,11	0.85	0.458333	0.391667
1H	495333686	G	T	0,6	5,0	6,34	14,11	0.85	0.44	0.41
1H	495333760	A	C	0,7	5,0	5,40	23,8	0.888889	0.258065	0.630824
1H	495333773	C	T	0,7	5,0	5,39	23,7	0.886364	0.233333	0.65303
1H	495333781	T	C	0,7	5,0	5,40	22,6	0.888889	0.214286	0.674603
1H	495333787	A	G	0,7	5,0	5,41	24,6	0.891304	0.2	0.691304
1H	495333793	G	C	0,7	5,0	5,42	24,7	0.893617	0.225806	0.667811
1H	495333796	A	G	0,7	5,0	5,42	24,8	0.893617	0.25	0.643617
1H	495333802	G	T	0,7	5,0	6,40	27,8	0.869565	0.228571	0.640994
1H	495333816	T	G	0,7	7,0	5,41	28,8	0.891304	0.222222	0.669082
1H	495335021	C	G	0,7	5,0	1,37	14,8	0.973684	0.363636	0.610048
1H	495335052	G	C	0,9	5,0	1,33	15,9	0.970588	0.375	0.595588
1H	495335084	A	G	0,8	6,0	0,35	18,7	1	0.28	0.72
1H	495335114	G	A	0,8	6,0	2,34	20,6	0.944444	0.230769	0.713675
1H	495335139	A	G	0,8	6,0	0,38	16,6	1	0.272727	0.727273
1H	495335188	T	C	0,8	5,0	0,41	11,3	1	0.214286	0.785714
1H	495335476	T	C	0,8	7,0	0,44	20,9	1	0.310345	0.689655
1H	495335493	C	T	0,8	6,0	0,42	20,8	1	0.285714	0.714286
1H	495335498	G	T	0,8	6,0	0,43	18,8	1	0.307692	0.692308
1H	495335523	T	C	0,5	7,0	0,36	22,8	1	0.266667	0.733333
1H	495335530	T	C	0,5	9,0	0,36	23,7	1	0.233333	0.766667
1H	495335698	T	C	0,5	6,0	3,33	17,10	0.916667	0.37037	0.546296
1H	495335709	T	C	0,5	7,0	3,34	17,8	0.918919	0.32	0.598919
1H	495335719	A	G	0,5	8,0	3,36	15,7	0.923077	0.318182	0.604895
1H	495335728	T	C	0,7	8,0	1,39	16,6	0.975	0.272727	0.702273
1H	495335730	C	A	0,7	8,0	1,38	16,6	0.974359	0.272727	0.701632
1H	495335741	G	A	0,7	8,0	1,39	16,4	0.975	0.2	0.775
1H	495335742	A	G	0,7	8,0	1,39	16,4	0.975	0.2	0.775
1H	495335767	T	C	0,8	6,0	1,38	19,2	0.974359	0.0952381	0.879121
1H	495335777	C	T	0,8	6,0	2,40	18,4	0.952381	0.181818	0.770563
1H	495335784	G	GA	0,9	6,0	2,41	18,4	0.953488	0.181818	0.77167
1H	495335799	T	C	0,10	7,0	2,40	17,4	0.952381	0.190476	0.761905
1H	495335932	C	G	0,5	11,0	10,24	23,12	0.705882	0.342857	0.363025
1H	495335939	A	G	0,7	11,0	10,22	26,13	0.6875	0.333333	0.354167
1H	495335959	T	C	0,8	10,0	10,27	25,13	0.72973	0.342105	0.387624
1H	495335960	G	A	0,8	10,0	10,27	25,13	0.72973	0.342105	0.387624
1H	495335964	T	C	0,8	10,0	10,23	26,14	0.69697	0.35	0.34697
1H	495335999	T	A	0,9	11,0	8,27	25,16	0.771429	0.390244	0.381185
1H	495336101	T	A	0,8	5,0	4,32	15,16	0.888889	0.516129	0.37276
1H	495336106	A	G	0,7	5,0	4,36	16,18	0.9	0.529412	0.370588
1H	495336126	A	C	0,8	6,0	4,35	15,15	0.897436	0.5	0.397436
1H	495336161	T	C	0,5	5,0	5,39	16,12	0.886364	0.428571	0.457792
1H	495336186	C	T	0,6	6,0	3,42	16,15	0.933333	0.483871	0.449462
1H	495336205	C	T	0,6	7,0	3,39	17,14	0.928571	0.451613	0.476959
1H	495336233	A	G	5,0	0,7	39,4	14,19	0.906977	0.424242	0.482734
1H	495336415	G	C	0,5	13,0	6,44	24,12	0.88	0.333333	0.546667
1H	495336469	A	G	0,6	7,0	3,53	24,15	0.946429	0.384615	0.561813
1H	495336501	C	T	0,6	9,0	5,51	29,14	0.910714	0.325581	0.585133
1H	495336513	C	T	0,6	9,0	5,56	28,14	0.918033	0.333333	0.584699
1H	495336528	T	C	0,6	9,0	3,61	28,17	0.953125	0.377778	0.575347
1H	495336535	C	T	0,5	8,2	3,57	25,16	0.95	0.390244	0.559756
1H	495336612	T	C	0,7	18,0	8,60	24,10	0.882353	0.294118	0.588235
1H	495336719	T	C	0,8	15,0	5,43	13,3	0.895833	0.1875	0.708333
1H	495338079	C	T	0,7	9,0	1,27	11,0	0.964286	0	0.964286
1H	495338097	T	C	0,6	10,0	2,28	13,0	0.933333	0	0.933333
1H	495338162	A	G	0,8	8,0	2,27	16,2	0.931034	0.111111	0.819923
1H	495338174	A	G	0,7	9,0	1,27	16,2	0.964286	0.111111	0.853175
1H	495338219	A	C	0,8	6,0	1,33	13,2	0.970588	0.133333	0.837255
1H	495338969	T	C	0,9	6,0	8,36	27,10	0.818182	0.27027	0.547912
1H	495340137	C	T	0,10	6,0	4,38	13,5	0.904762	0.277778	0.626984
1H	495340148	T	C	0,10	6,0	3,36	12,6	0.923077	0.333333	0.589744
1H	495340158	G	A	0,10	6,0	4,37	10,7	0.902439	0.411765	0.490674
1H	495340168	C	G	0,10	9,0	4,36	7,7	0.9	0.5	0.4
1H	495340169	G	T	0,10	9,0	4,37	7,7	0.902439	0.5	0.402439
1H	495340210	GA	G	0,7	10,0	2,37	10,8	0.948718	0.444444	0.504274
1H	495340267	C	T	0,7	13,0	6,47	11,11	0.886792	0.5	0.386792
1H	495340288	A	G	0,6	14,0	6,56	13,9	0.903226	0.409091	0.494135
1H	495349502	T	G	0,5	8,0	3,35	26,7	0.921053	0.212121	0.708931
1H	495350114	A	G	0,6	7,0	1,41	14,6	0.97619	0.3	0.67619
1H	495350207	G	A	0,5	6,0	1,49	16,5	0.98	0.238095	0.741905
1H	495350670	T	C	0,6	5,0	4,30	22,18	0.882353	0.45	0.432353
1H	495351516	T	C	0,7	5,0	1,54	13,11	0.981818	0.458333	0.523485
1H	495352309	T	TG	0,5	10,0	1,43	29,13	0.977273	0.309524	0.667749
1H	495352643	T	G	0,5	6,0	4,29	14,9	0.878788	0.391304	0.487484
1H	495352644	A	AC	0,5	6,0	4,30	14,8	0.882353	0.363636	0.518717
1H	495352770	C	T	0,7	6,0	3,46	18,9	0.938776	0.333333	0.605442
1H	495352861	G	A	0,8	7,0	2,43	22,8	0.955556	0.266667	0.688889
1H	495352868	G	T	0,8	9,0	2,48	22,7	0.96	0.241379	0.718621
1H	495352886	A	AT	0,9	6,0	4,51	28,10	0.927273	0.263158	0.664115
1H	495352914	CT	C	0,7	7,0	5,48	31,9	0.90566	0.225	0.68066
1H	495353046	C	T	0,8	8,0	3,46	18,7	0.938776	0.28	0.658776
1H	495353080	C	T	0,7	7,0	2,36	18,7	0.947368	0.28	0.667368
1H	495354281	C	CATTT	0,9	5,0	7,41	18,10	0.854167	0.357143	0.497024
1H	495354293	TTGC	T	0,8	7,0	7,42	20,11	0.857143	0.354839	0.502304
1H	495354298	ATCAAATTTCTCG	A	0,8	7,0	6,38	20,10	0.863636	0.333333	0.530303
1H	495354329	G	A	0,6	6,0	4,47	20,13	0.921569	0.393939	0.527629
1H	495354336	G	A	0,7	6,0	4,47	18,13	0.921569	0.419355	0.502214
1H	495354399	G	A	0,5	6,0	2,35	18,14	0.945946	0.4375	0.508446
1H	495354406	G	A	0,5	6,0	2,33	19,13	0.942857	0.40625	0.536607
1H	495354947	C	T	0,6	5,0	3,31	18,9	0.911765	0.333333	0.578431
1H	495354970	T	C	0,8	5,0	4,33	17,10	0.891892	0.37037	0.521522
1H	495354973	G	A	0,8	5,0	4,35	15,10	0.897436	0.4	0.497436
1H	495354981	T	G	0,8	5,0	4,37	15,10	0.902439	0.4	0.502439
1H	495355073	A	G	0,5	5,0	3,60	23,7	0.952381	0.233333	0.719048
1H	495355075	T	A	0,5	5,0	3,60	22,6	0.952381	0.214286	0.738095
1H	495355101	T	A	0,6	7,0	3,62	23,5	0.953846	0.178571	0.775275
1H	495355215	C	CA	0,5	9,0	2,52	20,3	0.962963	0.130435	0.832528
1H	495356720	G	A	0,6	10,0	0,38	17,10	1	0.37037	0.62963
1H	495357145	T	A	0,10	5,0	6,65	16,6	0.915493	0.272727	0.642766
1H	495357571	C	T	0,6	6,0	4,47	28,12	0.921569	0.3	0.621569
1H	495358488	A	T	0,6	10,0	3,36	19,10	0.923077	0.344828	0.578249
1H	495358994	ATGCCTCCGCCCG	A	0,5	6,0	3,32	7,7	0.914286	0.5	0.414286
1H	495359182	A	G	0,6	6,0	3,40	17,7	0.930233	0.291667	0.638566
1H	495360169	A	G	0,8	8,0	5,43	10,5	0.895833	0.333333	0.5625
1H	495360181	G	A	0,9	6,0	5,46	10,7	0.901961	0.411765	0.490196
1H	495360712	A	G	0,11	5,0	4,44	18,8	0.916667	0.307692	0.608974
1H	495361371	G	C	0,16	8,0	2,47	18,11	0.959184	0.37931	0.579873
1H	495362007	G	A	0,6	5,0	7,7	12,6	0.5	0.333333	0.166667
1H	495362353	G	A	0,5	5,0	10,42	14,5	0.807692	0.263158	0.544534
1H	495363096	G	T	0,6	9,0	10,37	13,4	0.787234	0.235294	0.55194
1H	495363166	T	C	0,5	15,0	7,34	18,7	0.829268	0.28	0.549268
1H	495363191	A	C	0,9	16,0	7,36	18,7	0.837209	0.28	0.557209
1H	495363199	AAC	A	0,9	15,0	6,31	19,7	0.837838	0.269231	0.568607
1H	495364126	T	G	0,6	17,0	3,45	34,14	0.9375	0.291667	0.645833
1H	495364195	G	T	0,11	16,0	5,43	31,18	0.895833	0.367347	0.528486
1H	495364214	T	C	0,11	14,0	5,43	33,14	0.895833	0.297872	0.597961
1H	495364379	TA	T	0,11	10,0	4,54	29,20	0.931034	0.408163	0.522871
1H	495364411	T	C	0,9	9,0	5,57	26,18	0.919355	0.409091	0.510264
1H	495365670	A	T	0,11	15,0	1,51	21,6	0.980769	0.222222	0.758547
1H	495365717	T	C	0,10	14,0	0,50	27,11	1	0.289474	0.710526
1H	495365882	A	C	0,10	13,0	3,55	27,10	0.948276	0.27027	0.678006
1H	495366515	G	GCAAA	0,5	9,0	1,31	10,2	0.96875	0.166667	0.802083
1H	495367681	A	G	0,11	10,0	2,45	11,9	0.957447	0.45	0.507447
1H	495367706	C	T	0,12	11,0	2,44	17,11	0.956522	0.392857	0.563665
1H	495367810	A	G	0,10	9,0	3,42	26,14	0.933333	0.35	0.583333
1H	495368749	G	A	18,0	0,7	45,0	4,19	1	0.173913	0.826087
1H	495403086	A	C	0,12	15,0	9,53	27,7	0.854839	0.205882	0.648956
1H	495422761	A	G	0,6	17,0	1,37	18,7	0.973684	0.28	0.693684
1H	495431257	G	C	11,0	0,5	43,8	13,24	0.843137	0.351351	0.491786
1H	495433411	C	T	6,0	0,7	50,0	6,21	1	0.222222	0.777778
1H	495445759	A	AT	13,0	0,8	59,0	7,15	1	0.318182	0.681818
1H	495447155	G	A	0,7	7,0	6,40	14,2	0.869565	0.125	0.744565
1H	495509303	G	GA	9,0	0,5	52,0	5,13	1	0.277778	0.722222
1H	495530589	G	A	6,0	0,6	41,0	11,26	1	0.297297	0.702703
1H	495538549	G	A	0,13	14,0	4,58	28,9	0.935484	0.243243	0.692241
1H	495560842	TATA	T	6,0	0,6	62,0	7,17	1	0.291667	0.708333
1H	495563094	G	A	10,0	1,6	57,0	4,26	1	0.133333	0.866667
1H	495566398	C	T	7,0	0,10	50,0	10,30	1	0.25	0.75
1H	495570772	C	A	0,11	10,0	3,46	16,7	0.938776	0.304348	0.634428
1H	495574101	G	A	8,0	0,9	40,0	7,18	1	0.28	0.72
1H	495614082	GA	G	10,0	0,5	20,3	5,17	0.869565	0.227273	0.642292
1H	495619987	C	T	7,0	0,6	29,4	5,17	0.878788	0.227273	0.651515
1H	495647811	C	A	0,10	13,0	7,41	11,11	0.854167	0.5	0.354167
1H	495660601	G	C	5,0	0,8	72,0	15,18	1	0.454545	0.545455
1H	495690367	C	T	0,7	11,0	2,71	19,12	0.972603	0.387097	0.585506
1H	495692370	C	CA	0,22	17,0	3,99	15,22	0.970588	0.594595	0.375994
1H	495714104	G	A	0,6	12,0	7,24	13,7	0.774194	0.35	0.424194
1H	495768585	G	A	11,0	0,6	34,0	3,13	1	0.1875	0.8125
1H	495789257	G	T	7,0	0,8	60,0	12,15	1	0.444444	0.555556
1H	495818249	G	A	0,6	10,0	3,36	30,8	0.923077	0.210526	0.712551
1H	495826190	G	T	15,0	0,14	56,9	8,20	0.861538	0.285714	0.575824
1H	495827069	C	G	5,0	0,7	50,3	12,17	0.943396	0.413793	0.529603
1H	495831391	C	T	0,5	5,0	2,29	10,7	0.935484	0.411765	0.523719
1H	495852045	T	A	23,0	2,12	34,0	10,10	1	0.5	0.5
1H	495889794	A	G	7,0	0,5	37,0	10,15	1	0.4	0.6
1H	495905837	C	A	0,7	7,0	1,42	19,13	0.976744	0.40625	0.570494
1H	495921094	T	C	9,0	0,12	52,6	9,19	0.896552	0.321429	0.575123
1H	495927921	A	G	7,0	0,6	58,0	7,23	1	0.233333	0.766667
1H	495939536	G	T	8,0	0,8	47,0	2,14	1	0.125	0.875
1H	495949097	G	A	5,0	0,10	47,7	12,14	0.87037	0.461538	0.408832
1H	495951934	A	AT	0,12	6,0	8,31	11,16	0.794872	0.592593	0.202279
1H	495975145	G	A	5,0	1,7	63,6	3,21	0.913043	0.125	0.788043
1H	495977495	C	T	5,0	0,9	25,7	2,12	0.78125	0.142857	0.638393
1H	495996047	G	T	0,5	5,0	3,34	25,5	0.918919	0.166667	0.752252
1H	496000928	G	A	5,0	0,8	26,0	8,13	1	0.380952	0.619048
1H	496001755	G	A	0,5	6,0	1,18	12,4	0.947368	0.25	0.697368
1H	496006312	A	T	0,7	6,0	4,54	15,13	0.931034	0.464286	0.466749
1H	496012215	G	A	11,0	0,13	47,0	6,15	1	0.285714	0.714286
1H	496016553	G	T	22,0	0,8	50,8	6,25	0.862069	0.193548	0.668521
1H	496016597	A	G	25,0	0,11	59,0	7,23	1	0.233333	0.766667
1H	496016768	CA	C	9,0	0,9	43,6	10,20	0.877551	0.333333	0.544218
1H	496017043	C	A	21,0	0,14	62,8	6,25	0.885714	0.193548	0.692166
1H	496017046	A	G	20,0	0,15	60,8	6,25	0.882353	0.193548	0.688805
1H	496017301	G	A	6,0	0,13	75,0	10,18	1	0.357143	0.642857
1H	496017366	TA	T	6,0	0,9	69,0	9,18	1	0.333333	0.666667
1H	496017399	C	T	10,0	0,8	62,0	11,16	1	0.407407	0.592593
1H	496017473	T	C	12,0	0,5	62,0	11,18	1	0.37931	0.62069
1H	496017489	C	T	8,0	0,6	62,0	12,18	1	0.4	0.6
1H	496017615	CA	C	6,0	0,5	52,6	19,22	0.896552	0.463415	0.433137
1H	496017623	T	A	6,0	0,5	57,6	19,22	0.904762	0.463415	0.441347
1H	496017639	A	C	7,0	0,5	62,6	19,23	0.911765	0.452381	0.459384
1H	496017841	C	T	9,0	0,11	51,0	12,16	1	0.428571	0.571429
1H	496017870	T	C	9,0	0,8	53,0	14,12	1	0.538462	0.461538
1H	496017871	G	A	9,0	0,7	53,0	13,11	1	0.541667	0.458333
1H	496017874	C	T	10,0	0,7	53,0	13,11	1	0.541667	0.458333
1H	496017897	A	G	11,0	0,6	43,0	13,6	1	0.684211	0.315789
1H	496017923	A	AG	6,0	0,5	43,0	14,5	1	0.736842	0.263158
1H	496017927	C	T	8,0	0,5	43,0	12,5	1	0.705882	0.294118
1H	496018881	C	T	5,0	0,8	25,0	7,13	1	0.35	0.65
1H	496018920	T	A	6,0	0,9	27,0	5,12	1	0.294118	0.705882
1H	496018945	T	TAGTAATGAAC	7,0	0,5	34,0	6,8	1	0.428571	0.571429
1H	496032183	T	C	11,0	0,10	41,0	7,11	1	0.388889	0.611111
1H	496032313	G	A	22,0	0,17	58,0	7,19	1	0.269231	0.730769
1H	496032347	T	C	17,0	0,18	70,0	6,20	1	0.230769	0.769231
1H	496032352	A	T	17,0	0,18	72,0	6,20	1	0.230769	0.769231
1H	496032356	T	G	15,0	0,17	72,0	6,22	1	0.214286	0.785714
1H	496032403	C	T	16,0	0,18	56,0	7,19	1	0.269231	0.730769
1H	496032526	T	A	15,0	0,13	56,0	7,16	1	0.304348	0.695652
1H	496032529	A	C	12,0	0,14	56,0	7,16	1	0.304348	0.695652
1H	496032572	A	ATT	11,0	0,8	56,0	6,15	1	0.285714	0.714286
1H	496032656	G	A	5,0	0,8	56,0	7,10	1	0.411765	0.588235
1H	496032691	C	G	10,0	0,8	56,0	7,14	1	0.333333	0.666667
1H	496032724	C	T	9,0	0,6	50,0	7,15	1	0.318182	0.681818
1H	496032749	T	C	10,0	0,5	51,0	5,17	1	0.227273	0.772727
1H	496032753	G	A	9,0	0,5	48,0	5,17	1	0.227273	0.772727
1H	496032787	C	T	11,0	0,5	46,0	6,19	1	0.24	0.76
1H	496032803	TAGGTTCTCG	T	10,0	0,7	45,0	6,20	1	0.230769	0.769231
1H	496032858	G	C	6,0	0,6	49,0	7,18	1	0.28	0.72
1H	496032967	G	A	9,0	0,7	33,3	6,15	0.916667	0.285714	0.630952
1H	496033003	C	A	8,0	0,7	33,5	6,15	0.868421	0.285714	0.582707
1H	496033025	G	GCA	8,0	0,7	34,4	5,13	0.894737	0.277778	0.616959
1H	496033027	GGC	G	6,0	0,7	33,4	5,12	0.891892	0.294118	0.597774
1H	496033064	C	G	5,0	0,6	34,4	4,10	0.894737	0.285714	0.609023
1H	496069155	T	G	7,0	0,5	56,9	11,23	0.861538	0.323529	0.538009
1H	496069767	A	T	17,0	0,5	46,0	4,19	1	0.173913	0.826087
1H	496069770	T	C	18,0	0,5	46,0	4,19	1	0.173913	0.826087
1H	496071453	T	C	7,0	0,6	51,5	11,18	0.910714	0.37931	0.531404
1H	496071493	T	C	5,0	0,8	38,5	11,16	0.883721	0.407407	0.476314
1H	496074687	A	G	5,0	0,6	45,0	8,9	1	0.470588	0.529412
1H	496074735	A	G	6,0	0,5	46,0	10,10	1	0.5	0.5
1H	496074747	G	T	6,0	0,5	41,0	8,9	1	0.470588	0.529412
1H	496074920	C	T	5,0	0,5	36,0	13,14	1	0.481481	0.518519
1H	496083888	A	G	8,0	0,10	43,0	14,20	1	0.411765	0.588235
1H	496083960	T	A	8,0	0,10	49,5	13,23	0.907407	0.361111	0.546296
1H	496083963	C	T	8,0	0,10	51,5	13,23	0.910714	0.361111	0.549603
1H	496084089	A	T	5,0	0,6	56,0	14,14	1	0.5	0.5
1H	496084101	T	C	6,0	0,6	56,0	15,12	1	0.555556	0.444444
1H	496084111	C	T	6,0	0,6	56,0	15,13	1	0.535714	0.464286
1H	496085928	G	C	5,0	0,5	35,9	9,14	0.795455	0.391304	0.40415
1H	496085937	C	T	7,0	0,5	39,6	7,12	0.866667	0.368421	0.498246
1H	496085972	A	T	9,0	0,5	44,7	7,12	0.862745	0.368421	0.494324
1H	496085992	T	C	11,0	0,5	55,6	8,12	0.901639	0.4	0.501639
1H	496086867	G	GT	6,0	0,5	33,0	6,5	1	0.545455	0.454545
1H	496088580	A	G	8,0	0,5	37,0	6,16	1	0.272727	0.727273
1H	496088584	G	C	8,0	0,5	37,0	6,16	1	0.272727	0.727273
1H	496088600	C	T	7,0	0,5	37,0	6,18	1	0.25	0.75
1H	496088601	G	A	7,0	0,5	37,0	6,18	1	0.25	0.75
1H	496088614	A	G	5,0	0,5	37,0	6,22	1	0.214286	0.785714
1H	496088813	A	T	9,0	0,6	45,0	3,14	1	0.176471	0.823529
1H	496088847	G	A	12,0	0,5	52,0	5,15	1	0.25	0.75
1H	496088906	T	C	10,0	0,8	45,0	8,17	1	0.32	0.68
1H	496088963	A	G	9,0	0,9	47,0	12,19	1	0.387097	0.612903
1H	496089112	C	T	5,0	0,7	57,0	9,18	1	0.333333	0.666667
1H	496089133	G	A	5,0	0,6	55,0	10,19	1	0.344828	0.655172
1H	496089196	T	C	6,0	0,5	55,0	11,18	1	0.37931	0.62069
1H	496089373	G	A	6,0	0,9	46,0	7,13	1	0.35	0.65
1H	496089461	C	T	5,0	0,9	46,0	6,9	1	0.4	0.6
1H	496089463	A	G	5,0	0,9	46,0	8,7	1	0.533333	0.466667
1H	496089536	C	A	6,0	0,6	45,0	10,10	1	0.5	0.5
1H	496089548	A	C	7,0	0,6	48,0	10,9	1	0.526316	0.473684
1H	496089574	A	C	7,0	0,5	43,0	10,9	1	0.526316	0.473684
1H	496089648	T	G	8,0	1,5	32,0	7,10	1	0.411765	0.588235
1H	496089692	G	T	7,0	0,6	36,0	6,9	1	0.4	0.6
1H	496090833	G	A	9,0	0,6	43,0	8,9	1	0.470588	0.529412
1H	496090886	G	A	8,0	0,5	43,0	8,9	1	0.470588	0.529412
1H	496090961	G	A	5,0	0,10	49,0	6,16	1	0.272727	0.727273
1H	496091122	T	A	13,0	0,5	48,0	11,23	1	0.323529	0.676471
1H	496091486	G	A	11,0	0,9	47,0	15,29	1	0.340909	0.659091
1H	496091567	T	C	6,0	0,7	42,0	14,26	1	0.35	0.65
1H	496091569	G	C	6,0	0,7	42,0	14,26	1	0.35	0.65
1H	496091705	C	A	6,0	0,9	45,0	15,20	1	0.428571	0.571429
1H	496091742	T	G	6,0	0,8	43,0	13,21	1	0.382353	0.617647
1H	496091773	T	G	6,0	0,7	41,0	7,19	1	0.269231	0.730769
1H	496091781	A	G	7,0	0,7	41,0	7,19	1	0.269231	0.730769
1H	496091853	T	G	8,0	0,7	37,0	6,17	1	0.26087	0.73913
1H	496091890	C	T	10,0	0,5	36,0	6,14	1	0.3	0.7
1H	496091979	T	C	11,2	0,9	33,0	5,18	1	0.217391	0.782609
1H	496092014	G	C	16,0	0,9	36,0	9,18	1	0.333333	0.666667
1H	496092019	A	G	16,0	0,9	33,0	9,18	1	0.333333	0.666667
1H	496092037	G	C	15,0	0,8	36,0	8,17	1	0.32	0.68
1H	496092067	G	C	13,0	0,9	42,0	10,20	1	0.333333	0.666667
1H	496092249	A	G	5,0	0,6	52,0	8,16	1	0.333333	0.666667
1H	496092277	T	A	6,0	0,7	49,0	7,15	1	0.318182	0.681818
1H	496092281	G	A	6,0	0,7	48,0	8,15	1	0.347826	0.652174
1H	496092306	A	G	6,0	0,6	44,0	9,13	1	0.409091	0.590909
1H	496092335	T	C	6,0	0,7	43,0	8,15	1	0.347826	0.652174
1H	496092382	C	T	5,0	0,7	31,0	7,14	1	0.333333	0.666667
1H	496092505	A	T	14,0	0,7	33,3	10,16	0.916667	0.384615	0.532051
1H	496092526	G	A	13,0	0,5	39,4	9,17	0.906977	0.346154	0.560823
1H	496093089	GT	G	9,0	0,8	47,0	13,20	1	0.393939	0.606061
1H	496093161	C	T	11,0	0,9	48,0	13,21	1	0.382353	0.617647
1H	496093175	T	G	11,0	0,9	47,0	10,24	1	0.294118	0.705882
1H	496093603	G	GC	7,0	0,5	59,0	13,25	1	0.342105	0.657895
1H	496093604	G	C	6,0	0,5	59,0	13,26	1	0.333333	0.666667
1H	496094156	C	A	7,0	0,15	52,6	11,35	0.896552	0.23913	0.657421
1H	496094374	G	A	5,0	0,6	30,5	5,14	0.857143	0.263158	0.593985
1H	496094511	A	G	11,0	0,12	47,6	7,16	0.886792	0.304348	0.582445
1H	496094517	T	A	11,0	0,11	47,7	6,16	0.87037	0.272727	0.597643
1H	496094596	A	C	10,0	0,9	59,8	7,18	0.880597	0.28	0.600597
1H	496094665	C	T	6,0	0,8	50,3	8,17	0.943396	0.32	0.623396
1H	496094713	C	T	7,0	0,12	51,0	11,15	1	0.423077	0.576923
1H	496094790	C	T	6,0	0,8	33,0	10,11	1	0.47619	0.52381
1H	496095049	T	C	12,0	0,10	42,6	7,22	0.875	0.241379	0.633621
1H	496095317	TG	T	10,0	0,5	50,0	16,19	1	0.457143	0.542857
1H	496095321	G	T	9,0	0,5	52,0	17,20	1	0.459459	0.540541
1H	496095328	G	A	9,0	0,6	53,0	17,22	1	0.435897	0.564103
1H	496095418	C	T	10,0	0,13	45,0	15,21	1	0.416667	0.583333
1H	496095427	C	T	8,0	0,13	45,0	15,19	1	0.441176	0.558824
1H	496095441	A	AC	8,0	0,13	45,0	13,18	1	0.419355	0.580645
1H	496095458	G	A	7,0	0,18	45,0	13,23	1	0.361111	0.638889
1H	496095542	G	C	10,0	0,8	45,0	11,19	1	0.366667	0.633333
1H	496095564	T	A	10,0	0,8	45,0	9,18	1	0.333333	0.666667
1H	496095575	G	T	11,0	0,8	45,0	9,18	1	0.333333	0.666667
1H	496095609	T	C	15,0	0,9	46,0	12,17	1	0.413793	0.586207
1H	496095744	T	G	11,0	0,7	44,0	17,26	1	0.395349	0.604651
1H	496095750	T	A	10,0	0,5	44,0	16,26	1	0.380952	0.619048
1H	496096367	C	A	5,0	0,7	34,0	12,20	1	0.375	0.625
1H	496096438	G	A	5,0	0,5	23,0	9,15	1	0.375	0.625
1H	496096440	T	C	5,0	0,5	23,0	9,15	1	0.375	0.625
1H	496097029	C	A	8,0	0,5	37,0	7,19	1	0.269231	0.730769
1H	496097077	A	C	9,0	0,5	48,0	8,18	1	0.307692	0.692308
1H	496097357	T	G	10,0	0,9	33,0	5,23	1	0.178571	0.821429
1H	496097471	T	A	5,0	0,11	41,0	6,31	1	0.162162	0.837838
1H	496097540	G	A	5,0	0,9	40,0	5,29	1	0.147059	0.852941
1H	496097593	G	T	7,0	0,5	33,6	5,25	0.846154	0.166667	0.679487
1H	496097607	T	G	8,0	0,5	32,6	4,24	0.842105	0.142857	0.699248
1H	496097643	G	T	8,0	0,5	30,5	4,18	0.857143	0.181818	0.675325
1H	496097727	A	G	7,0	0,6	55,0	2,20	1	0.0909091	0.909091
1H	496097756	C	A	0,5	7,0	0,53	23,3	1	0.115385	0.884615
1H	496097770	C	G	5,0	0,7	57,0	3,23	1	0.115385	0.884615
1H	496097860	C	T	5,0	0,10	49,5	6,17	0.907407	0.26087	0.646538
1H	496097889	G	A	6,0	0,10	39,4	6,20	0.906977	0.230769	0.676208
1H	496097893	T	C	6,0	0,11	38,4	5,20	0.904762	0.2	0.704762
1H	496097904	C	T	6,0	0,10	38,4	5,17	0.904762	0.227273	0.677489
1H	496097927	A	G	7,0	0,9	43,5	7,16	0.895833	0.304348	0.591486
1H	496097984	A	T	5,0	0,7	33,0	6,16	1	0.272727	0.727273
1H	496098275	C	T	6,0	0,7	41,0	6,7	1	0.461538	0.538462
1H	496098371	C	A	5,0	0,13	49,0	11,15	1	0.423077	0.576923
1H	496098425	G	C	6,0	0,6	54,0	12,18	1	0.4	0.6
1H	496098477	T	A	8,0	0,7	57,0	13,14	1	0.481481	0.518519
1H	496098486	A	C	8,0	0,7	62,0	14,14	1	0.5	0.5
1H	496098558	A	G	5,0	0,8	58,0	16,17	1	0.484848	0.515152
1H	496098563	AT	A	5,0	0,8	58,0	16,17	1	0.484848	0.515152
1H	496098602	C	T	5,0	0,7	45,0	17,16	1	0.515152	0.484848
1H	496098639	C	T	7,0	0,5	40,0	15,13	1	0.535714	0.464286
1H	496099432	T	C	13,0	0,12	44,0	7,10	1	0.411765	0.588235
1H	496099495	G	A	9,0	0,10	51,0	6,12	1	0.333333	0.666667
1H	496099519	G	A	9,0	0,5	50,0	7,11	1	0.388889	0.611111
1H	496099925	A	C	10,0	0,6	50,0	16,9	1	0.64	0.36
1H	496100095	T	C	12,0	0,5	38,0	16,10	1	0.615385	0.384615
1H	496100151	A	G	8,0	0,8	41,0	15,12	1	0.555556	0.444444
1H	496100189	A	G	9,0	0,9	45,0	17,9	1	0.653846	0.346154
1H	496100211	T	C	9,0	0,11	46,0	16,10	1	0.615385	0.384615
1H	496100298	T	G	5,0	0,8	46,0	13,12	1	0.52	0.48
1H	496100498	C	T	6,0	0,6	34,4	8,16	0.894737	0.333333	0.561404
1H	496100537	C	A	6,0	0,7	37,4	7,19	0.902439	0.269231	0.633208
1H	496100538	G	C	6,0	0,7	39,4	7,19	0.906977	0.269231	0.637746
1H	496100602	C	T	5,0	0,5	49,0	10,17	1	0.37037	0.62963
1H	496100605	C	T	5,0	0,5	52,0	10,17	1	0.37037	0.62963
1H	496100703	C	T	8,0	0,5	52,0	10,17	1	0.37037	0.62963
1H	496100783	G	T	11,0	0,6	69,0	9,21	1	0.3	0.7
1H	496101222	G	T	9,0	0,5	39,0	12,37	1	0.244898	0.755102
1H	496102423	A	T	9,0	0,6	64,0	10,22	1	0.3125	0.6875
1H	496102452	T	C	9,0	0,8	70,0	8,20	1	0.285714	0.714286
1H	496102471	T	C	10,0	0,8	67,0	8,17	1	0.32	0.68
1H	496102495	T	C	9,0	0,6	65,0	7,12	1	0.368421	0.631579
1H	496102529	C	T	7,0	0,6	62,0	11,11	1	0.5	0.5
1H	496102729	T	C	17,0	0,9	64,0	8,16	1	0.333333	0.666667
1H	496102732	G	C	17,0	0,9	64,0	9,14	1	0.391304	0.608696
1H	496102781	A	AT	17,0	0,10	49,2	9,14	0.960784	0.391304	0.56948
1H	496102811	G	T	15,0	0,12	50,2	11,14	0.961538	0.44	0.521538
1H	496102832	G	T	12,0	0,9	55,0	10,14	1	0.416667	0.583333
1H	496102912	T	G	8,0	0,6	47,0	16,11	1	0.592593	0.407407
1H	496103115	T	C	5,0	0,6	36,0	11,4	1	0.733333	0.266667
1H	496103117	G	A	5,0	0,6	36,0	11,4	1	0.733333	0.266667
1H	496103128	G	C	5,0	0,5	36,0	11,4	1	0.733333	0.266667
1H	496103347	G	C	5,0	0,8	36,0	13,11	1	0.541667	0.458333
1H	496104122	C	T	6,0	0,6	49,0	8,10	1	0.444444	0.555556
1H	496104260	G	T	8,0	1,10	57,0	9,10	1	0.473684	0.526316
1H	496104289	T	C	9,0	1,7	50,0	11,9	1	0.55	0.45
1H	496104295	G	T	7,0	1,6	50,0	11,9	1	0.55	0.45
1H	496104476	T	G	7,0	0,7	59,6	7,8	0.907692	0.466667	0.441026
1H	496104568	C	T	11,0	0,7	55,2	5,7	0.964912	0.416667	0.548246
1H	496104574	C	A	10,0	0,8	58,0	5,7	1	0.416667	0.583333
1H	496104621	G	A	12,0	0,5	48,0	5,9	1	0.357143	0.642857
1H	496105027	T	C	8,0	0,8	40,0	7,11	1	0.388889	0.611111
1H	496105093	T	A	9,0	0,8	40,0	13,22	1	0.371429	0.628571
1H	496105125	C	T	12,0	0,8	40,0	14,21	1	0.4	0.6
1H	496105246	G	A	12,0	0,5	58,0	12,17	1	0.413793	0.586207
1H	496105247	A	C	12,0	0,5	57,0	11,17	1	0.392857	0.607143
1H	496105252	T	A	11,0	0,5	55,0	10,18	1	0.357143	0.642857
1H	496105336	A	T	10,0	0,5	49,4	6,13	0.924528	0.315789	0.608739
1H	496105344	T	C	10,0	0,5	46,5	8,13	0.901961	0.380952	0.521008
1H	496105351	C	T	10,0	0,5	49,5	10,14	0.907407	0.416667	0.490741
1H	496107089	G	C	10,0	0,7	51,6	11,26	0.894737	0.297297	0.59744
1H	496107090	A	G	12,0	0,7	51,6	11,26	0.894737	0.297297	0.59744
1H	496107192	C	T	15,0	0,13	51,5	16,25	0.910714	0.390244	0.52047
1H	496107199	C	T	14,0	0,13	53,5	16,26	0.913793	0.380952	0.532841
1H	496107227	T	A	15,0	0,14	51,4	19,29	0.927273	0.395833	0.531439
1H	496107229	A	T	15,0	0,14	51,4	19,29	0.927273	0.395833	0.531439
1H	496107249	C	G	13,0	0,16	56,0	19,33	1	0.365385	0.634615
1H	496107382	C	CT	9,0	0,11	51,0	10,23	1	0.30303	0.69697
1H	496107383	A	T	9,0	0,11	51,0	10,23	1	0.30303	0.69697
1H	496107423	A	T	13,0	0,8	51,0	10,19	1	0.344828	0.655172
1H	496107432	GT	G	13,0	0,6	58,0	10,19	1	0.344828	0.655172
1H	496107434	T	G	12,0	0,6	50,0	10,19	1	0.344828	0.655172
1H	496107609	C	G	10,0	0,5	43,0	4,14	1	0.222222	0.777778
1H	496107715	A	C	7,0	0,6	37,0	5,18	1	0.217391	0.782609
1H	496107843	T	C	5,0	0,5	28,6	9,21	0.823529	0.3	0.523529
1H	496107960	C	T	6,0	1,9	38,3	8,24	0.926829	0.25	0.676829
1H	496107970	A	G	6,0	1,8	39,0	8,26	1	0.235294	0.764706
1H	496108176	C	A	5,0	0,11	42,3	8,18	0.933333	0.307692	0.625641
1H	496108186	G	A	5,0	0,11	37,4	8,17	0.902439	0.32	0.582439
1H	496108218	T	G	7,0	0,7	42,5	10,15	0.893617	0.4	0.493617
1H	496108219	C	G	7,0	0,5	42,5	10,15	0.893617	0.4	0.493617
1H	496108552	C	T	10,0	0,5	47,0	10,27	1	0.27027	0.72973
1H	496108800	A	G	7,0	0,6	33,0	8,8	1	0.5	0.5
1H	496108803	A	T	6,0	0,6	33,0	8,8	1	0.5	0.5
1H	496108810	A	G	6,0	0,6	33,0	8,8	1	0.5	0.5
1H	496109634	T	C	8,0	0,7	46,0	2,18	1	0.1	0.9
1H	496112421	C	CTT	5,0	0,6	52,5	3,9	0.912281	0.25	0.662281
1H	496112502	G	T	7,0	0,5	69,0	8,13	1	0.380952	0.619048
1H	496112548	A	G	6,0	0,5	47,0	9,10	1	0.473684	0.526316
1H	496112559	G	A	6,0	0,5	50,0	11,11	1	0.5	0.5
1H	496114813	A	G	6,0	0,5	37,3	8,17	0.925	0.32	0.605
1H	496114818	T	A	6,0	0,5	37,3	9,16	0.925	0.36	0.565
1H	496115072	T	G	9,0	0,7	59,0	8,25	1	0.242424	0.757576
1H	496115083	A	AGTACCCTTACTAC	9,0	0,7	56,0	10,27	1	0.27027	0.72973
1H	496115085	A	AACTACCCTGTT	9,0	0,5	55,0	10,21	1	0.322581	0.677419
1H	496115147	ATAG	A	9,0	0,9	44,0	11,21	1	0.34375	0.65625
1H	496115155	T	C	9,0	0,10	45,0	11,20	1	0.354839	0.645161
1H	496115198	A	T	8,0	0,11	40,0	13,19	1	0.40625	0.59375
1H	496115217	TG	T	8,0	0,11	42,0	13,20	1	0.393939	0.606061
1H	496115244	T	A	12,0	0,10	46,0	12,24	1	0.333333	0.666667
1H	496115274	A	G	12,0	0,12	48,0	10,21	1	0.322581	0.677419
1H	496115360	A	T	9,0	0,8	43,0	12,21	1	0.363636	0.636364
1H	496115393	A	G	6,0	0,11	43,0	9,18	1	0.333333	0.666667
1H	496115515	T	A	5,0	0,9	45,0	11,16	1	0.407407	0.592593
1H	496115518	T	G	5,0	0,10	46,0	11,16	1	0.407407	0.592593
1H	496115823	T	G	10,0	0,6	71,0	13,7	1	0.65	0.35
1H	496115829	T	TG	10,0	0,6	71,0	12,7	1	0.631579	0.368421
1H	496115842	T	C	12,0	0,6	70,0	14,8	1	0.636364	0.363636
1H	496115866	C	A	11,0	0,7	60,3	15,11	0.952381	0.576923	0.375458
1H	496115872	A	T	11,0	0,8	58,4	14,11	0.935484	0.56	0.375484
1H	496115898	A	T	8,0	0,10	57,5	11,16	0.919355	0.407407	0.511947
1H	496115899	G	A	8,0	0,10	57,5	11,16	0.919355	0.407407	0.511947
1H	496115901	C	T	8,0	0,10	58,5	11,16	0.920635	0.407407	0.513228
1H	496115907	T	G	8,0	0,12	59,6	11,17	0.907692	0.392857	0.514835
1H	496115964	C	G	9,0	0,13	63,5	6,21	0.926471	0.222222	0.704248
1H	496115978	C	T	9,0	0,12	60,5	6,22	0.923077	0.214286	0.708791
1H	496115999	A	G	8,0	0,12	69,4	5,22	0.945205	0.185185	0.76002
1H	496116060	G	T	7,0	0,7	68,0	5,22	1	0.185185	0.814815
1H	496116064	C	CAAAT	8,0	0,7	66,0	6,22	1	0.214286	0.785714
1H	496116066	A	ATATATTAC	8,0	0,6	62,0	7,23	1	0.233333	0.766667
1H	496116099	C	T	6,0	0,5	61,0	7,21	1	0.25	0.75
1H	496116105	C	T	6,0	0,5	60,0	8,20	1	0.285714	0.714286
1H	496116106	T	C	6,0	0,5	60,0	8,20	1	0.285714	0.714286
1H	496116211	C	A	6,0	0,7	33,1	9,12	0.970588	0.428571	0.542017
1H	496116215	G	A	6,0	0,9	34,1	7,11	0.971429	0.388889	0.58254
1H	496116227	G	A	6,0	0,10	34,0	8,12	1	0.4	0.6
1H	496116239	T	C	5,0	0,11	39,0	8,15	1	0.347826	0.652174
1H	496116256	C	G	5,0	0,12	49,0	12,16	1	0.428571	0.571429
1H	496116263	A	G	6,0	0,12	49,0	11,17	1	0.392857	0.607143
1H	496116278	C	T	6,0	0,12	49,0	14,18	1	0.4375	0.5625
1H	496116288	G	C	6,0	0,12	49,0	13,19	1	0.40625	0.59375
1H	496116296	C	T	7,0	0,13	49,0	14,19	1	0.424242	0.575758
1H	496116300	A	G	7,0	0,13	49,0	16,18	1	0.470588	0.529412
1H	496116337	G	A	10,0	0,19	61,0	16,20	1	0.444444	0.555556
1H	496116338	G	A	10,0	0,19	61,0	16,20	1	0.444444	0.555556
1H	496116370	T	G	13,0	0,14	62,0	16,17	1	0.484848	0.515152
1H	496116381	T	C	13,0	0,13	62,0	15,17	1	0.46875	0.53125
1H	496116383	A	G	13,0	0,13	62,0	15,16	1	0.483871	0.516129
1H	496116406	G	T	15,0	0,15	67,0	15,15	1	0.5	0.5
1H	496116438	T	C	12,0	0,18	72,0	15,15	1	0.5	0.5
1H	496116439	G	C	12,0	0,17	73,0	15,15	1	0.5	0.5
1H	496116457	G	A	14,0	0,17	78,0	13,15	1	0.464286	0.535714
1H	496116499	C	A	8,0	0,14	73,0	10,16	1	0.384615	0.615385
1H	496116511	C	T	8,0	0,14	70,0	8,17	1	0.32	0.68
1H	496116519	T	C	8,0	0,15	60,0	8,17	1	0.32	0.68
1H	496116529	A	T	9,0	0,15	58,0	10,19	1	0.344828	0.655172
1H	496116530	C	T	9,0	0,15	58,0	10,19	1	0.344828	0.655172
1H	496116542	T	C	10,0	0,15	56,0	10,16	1	0.384615	0.615385
1H	496116543	A	T	10,0	0,15	54,0	10,16	1	0.384615	0.615385
1H	496116569	A	C	13,0	0,13	55,0	6,18	1	0.25	0.75
1H	496116589	C	T	10,0	0,12	54,0	5,16	1	0.238095	0.761905
1H	496116590	G	C	10,0	0,11	55,0	5,16	1	0.238095	0.761905
1H	496116604	C	T	10,0	0,11	57,0	6,17	1	0.26087	0.73913
1H	496116605	T	TC	10,0	0,11	55,0	6,17	1	0.26087	0.73913
1H	496116619	A	G	12,0	0,11	55,0	5,17	1	0.227273	0.772727
1H	496116625	T	C	13,0	0,10	55,0	7,20	1	0.259259	0.740741
1H	496116632	C	T	12,0	0,9	56,0	8,17	1	0.32	0.68
1H	496116719	A	G	11,0	0,9	51,0	7,14	1	0.333333	0.666667
1H	496116730	TA	T	11,0	0,11	51,0	7,15	1	0.318182	0.681818
1H	496116733	A	C	12,0	0,11	51,0	8,16	1	0.333333	0.666667
1H	496116902	G	A	9,2	0,9	51,0	19,30	1	0.387755	0.612245
1H	496116916	C	A	6,1	0,8	51,0	19,25	1	0.431818	0.568182
1H	496116921	G	A	5,1	0,8	51,0	18,25	1	0.418605	0.581395
1H	496116928	C	A	6,1	0,9	51,0	18,20	1	0.473684	0.526316
1H	496116931	T	C	7,1	0,10	51,0	18,20	1	0.473684	0.526316
1H	496117133	A	C	7,0	0,5	35,0	11,9	1	0.55	0.45
1H	496117804	G	C	14,0	0,5	51,0	10,12	1	0.454545	0.545455
1H	496117811	T	C	14,0	0,5	54,0	9,11	1	0.45	0.55
1H	496118023	T	C	8,0	0,5	55,0	13,10	1	0.565217	0.434783
1H	496118037	A	T	8,0	0,5	53,0	12,13	1	0.48	0.52
1H	496118064	A	G	8,0	0,6	50,0	13,14	1	0.481481	0.518519
1H	496118937	G	A	5,0	0,7	24,2	7,12	0.923077	0.368421	0.554656
1H	496118971	T	C	5,0	0,8	22,1	6,11	0.956522	0.352941	0.603581
1H	496119861	C	T	13,0	0,11	42,6	13,22	0.875	0.371429	0.503571
1H	496119894	C	T	15,0	0,10	43,5	17,25	0.895833	0.404762	0.491071
1H	496119916	C	T	15,0	0,5	46,5	16,25	0.901961	0.390244	0.511717
1H	496119957	TA	T	15,0	0,6	62,0	16,22	1	0.421053	0.578947
1H	496120109	C	T	9,0	0,15	50,9	8,23	0.847458	0.258065	0.589393
1H	496120148	A	T	7,0	0,10	48,0	9,24	1	0.272727	0.727273
1H	496120154	GAA	G	7,0	0,7	49,0	10,23	1	0.30303	0.69697
1H	496120500	T	C	5,0	0,6	45,0	12,22	1	0.352941	0.647059
1H	496120502	A	G	5,0	0,7	45,0	12,22	1	0.352941	0.647059
1H	496120611	C	T	6,0	0,7	50,0	9,16	1	0.36	0.64
1H	496120944	A	AT	8,0	0,10	43,6	12,15	0.877551	0.444444	0.433107
1H	496121034	A	C	12,0	0,12	50,0	12,19	1	0.387097	0.612903
1H	496121197	C	G	6,0	0,6	59,0	17,18	1	0.485714	0.514286
1H	496121213	C	G	6,0	0,6	45,0	24,18	1	0.571429	0.428571
1H	496121466	C	CTAGT	10,0	0,6	45,0	11,26	1	0.297297	0.702703
1H	496121646	C	G	11,0	0,9	33,5	10,32	0.868421	0.238095	0.630326
1H	496121696	A	T	0,13	10,0	3,36	34,12	0.923077	0.26087	0.662207
1H	496121777	A	G	8,0	0,11	42,0	9,22	1	0.290323	0.709677
1H	496121848	T	G	8,0	0,9	47,0	7,19	1	0.269231	0.730769
1H	496121862	A	G	8,0	0,9	47,0	7,22	1	0.241379	0.758621
1H	496122225	T	C	6,0	0,9	80,0	11,21	1	0.34375	0.65625
1H	496122253	A	T	5,0	0,12	84,0	10,22	1	0.3125	0.6875
1H	496124454	G	C	5,0	0,6	32,5	10,25	0.864865	0.285714	0.579151
1H	496124522	C	G	9,0	0,8	34,6	11,23	0.85	0.323529	0.526471
1H	496124536	T	TA	9,0	0,8	40,7	12,22	0.851064	0.352941	0.498123
1H	496124564	T	C	11,0	0,6	48,7	12,27	0.872727	0.307692	0.565035
1H	496124574	T	C	13,0	0,7	53,6	12,27	0.898305	0.307692	0.590613
1H	496124642	T	C	13,0	0,9	59,5	9,25	0.921875	0.264706	0.657169
1H	496124645	C	T	13,0	0,10	59,8	9,25	0.880597	0.264706	0.615891
1H	496124657	T	C	12,0	0,9	57,8	9,26	0.876923	0.257143	0.61978
1H	496124660	T	G	12,0	0,8	59,8	9,28	0.880597	0.243243	0.637354
1H	496124694	T	C	11,0	0,10	53,7	7,29	0.883333	0.194444	0.688889
1H	496124709	A	G	11,0	0,9	55,7	7,26	0.887097	0.212121	0.674976
1H	496124713	G	A	11,0	0,10	50,7	7,26	0.877193	0.212121	0.665072
1H	496124847	T	C	11,0	0,6	51,0	9,24	1	0.272727	0.727273
1H	496125062	G	A	11,0	0,8	52,2	11,24	0.962963	0.314286	0.648677
1H	496125066	G	T	0,10	8,0	2,50	23,11	0.961538	0.323529	0.638009
1H	496125132	A	G	7,0	0,8	46,0	14,23	1	0.378378	0.621622
1H	496125148	C	T	7,0	0,7	47,0	10,25	1	0.285714	0.714286
1H	496125157	T	C	7,0	0,7	50,0	11,25	1	0.305556	0.694444
1H	496125955	T	C	6,0	0,9	35,4	12,18	0.897436	0.4	0.497436
1H	496126220	C	G	11,0	0,8	50,5	12,11	0.909091	0.521739	0.387352
1H	496126259	C	T	11,0	0,8	43,0	12,10	1	0.545455	0.454545
1H	496126559	C	G	11,0	0,8	28,6	5,11	0.823529	0.3125	0.511029
1H	496126583	T	G	11,0	0,9	44,7	5,11	0.862745	0.3125	0.550245
1H	496126768	G	C	9,0	1,6	40,0	7,3	1	0.7	0.3
1H	496126770	C	T	9,0	1,6	40,0	7,3	1	0.7	0.3
1H	496126780	A	G	10,0	1,4	38,0	7,3	1	0.7	0.3
1H	496126782	C	T	10,0	1,4	36,0	7,3	1	0.7	0.3
1H	496126783	A	C	10,0	1,4	36,0	7,3	1	0.7	0.3
1H	496131170	G	A	8,0	0,5	51,0	11,21	1	0.34375	0.65625
1H	496131185	G	C	8,0	0,6	52,0	11,21	1	0.34375	0.65625
1H	496131188	T	G	8,0	0,6	50,0	11,22	1	0.333333	0.666667
1H	496131197	A	C	8,0	0,6	50,0	12,20	1	0.375	0.625
1H	496131202	C	T	9,0	0,6	57,0	12,18	1	0.4	0.6
1H	496131233	C	T	11,0	0,8	55,0	10,17	1	0.37037	0.62963
1H	496131263	T	A	11,0	0,9	50,0	7,9	1	0.4375	0.5625
[truncated: 6,578 more rows]

## Sheet: BSR targetR genes location
ID	Chr	Start	End
HORVU.MOREX.r3.1HG0082370	1H	490323159	490325444
HORVU.MOREX.r3.1HG0082380	1H	490356265	490358869
HORVU.MOREX.r3.1HG0082410	1H	490370357	490375133
HORVU.MOREX.r3.1HG0082440	1H	490400981	490406605
HORVU.MOREX.r3.1HG0082450	1H	490414881	490415870
HORVU.MOREX.r3.1HG0082500	1H	490443236	490449186
HORVU.MOREX.r3.1HG0082510	1H	490449430	490450440
HORVU.MOREX.r3.1HG0082530	1H	490498417	490506603
HORVU.MOREX.r3.1HG0082540	1H	490506829	490508424
HORVU.MOREX.r3.1HG0082550	1H	490521806	490523488
HORVU.MOREX.r3.1HG0082570	1H	490564239	490565854
HORVU.MOREX.r3.1HG0082620	1H	490618286	490620207
HORVU.MOREX.r3.1HG0082630	1H	490623266	490625038
HORVU.MOREX.r3.1HG0082640	1H	490626536	490628188
HORVU.MOREX.r3.1HG0082740	1H	490769489	490770536
HORVU.MOREX.r3.1HG0082750	1H	490775302	490775928
HORVU.MOREX.r3.1HG0082760	1H	490790178	490791937
HORVU.MOREX.r3.1HG0082770	1H	490808499	490811061
HORVU.MOREX.r3.1HG0082780	1H	490811801	490814814
HORVU.MOREX.r3.1HG0082790	1H	490816117	490817467
HORVU.MOREX.r3.1HG0082800	1H	490844190	490844626
HORVU.MOREX.r3.1HG0082810	1H	490901699	490902820
HORVU.MOREX.r3.1HG0082820	1H	490962982	490965789
HORVU.MOREX.r3.1HG0082860	1H	491031853	491042986
HORVU.MOREX.r3.1HG0082910	1H	491095991	491096695
HORVU.MOREX.r3.1HG0082920	1H	491097468	491099157
HORVU.MOREX.r3.1HG0082960	1H	491119549	491122035
HORVU.MOREX.r3.1HG0082980	1H	491252584	491253079
HORVU.MOREX.r3.1HG0082990	1H	491308535	491308909
HORVU.MOREX.r3.1HG0083050	1H	491468484	491468928
HORVU.MOREX.r3.1HG0083100	1H	491732185	491732466
HORVU.MOREX.r3.1HG0083110	1H	491734075	491735175
HORVU.MOREX.r3.1HG0083130	1H	491753279	491754339
HORVU.MOREX.r3.1HG0083140	1H	491764125	491765149
HORVU.MOREX.r3.1HG0083170	1H	491820014	491824333
HORVU.MOREX.r3.1HG0083210	1H	491926274	491927715
HORVU.MOREX.r3.1HG0083220	1H	491937777	491941530
HORVU.MOREX.r3.1HG0083250	1H	491957849	491971995
HORVU.MOREX.r3.1HG0083260	1H	491973024	491976614
HORVU.MOREX.r3.1HG0083270	1H	491988763	491989893
HORVU.MOREX.r3.1HG0083280	1H	491995984	491997837
HORVU.MOREX.r3.1HG0083310	1H	492035923	492040020
HORVU.MOREX.r3.1HG0083320	1H	492040341	492042194
HORVU.MOREX.r3.1HG0083340	1H	492082345	492083877
HORVU.MOREX.r3.1HG0083360	1H	492173484	492175409
HORVU.MOREX.r3.1HG0083370	1H	492192634	492193945
HORVU.MOREX.r3.1HG0083430	1H	492241938	492243134
HORVU.MOREX.r3.1HG0083440	1H	492245093	492250596
HORVU.MOREX.r3.1HG0083460	1H	492338674	492339165
HORVU.MOREX.r3.1HG0083470	1H	492345910	492348267
HORVU.MOREX.r3.1HG0083490	1H	492445572	492446186
HORVU.MOREX.r3.1HG0083510	1H	492583718	492584332
HORVU.MOREX.r3.1HG0083520	1H	492597987	492600615
HORVU.MOREX.r3.1HG0083550	1H	492680454	492682616
HORVU.MOREX.r3.1HG0083570	1H	492696219	492696711
HORVU.MOREX.r3.1HG0083580	1H	492702411	492705128
HORVU.MOREX.r3.1HG0083600	1H	492716327	492718918
HORVU.MOREX.r3.1HG0083610	1H	492722576	492723946
HORVU.MOREX.r3.1HG0083620	1H	492775234	492778159
HORVU.MOREX.r3.1HG0083630	1H	492804391	492807184
HORVU.MOREX.r3.1HG0083640	1H	492807210	492809250
HORVU.MOREX.r3.1HG0083650	1H	492810317	492815185
HORVU.MOREX.r3.1HG0083660	1H	492921703	492922377
HORVU.MOREX.r3.1HG0083670	1H	492963045	492967260
HORVU.MOREX.r3.1HG0083690	1H	493059705	493065154
HORVU.MOREX.r3.1HG0083700	1H	493068212	493069273
HORVU.MOREX.r3.1HG0083710	1H	493085098	493085798
HORVU.MOREX.r3.1HG0083720	1H	493170397	493171069
HORVU.MOREX.r3.1HG0083730	1H	493176744	493177306
HORVU.MOREX.r3.1HG0083740	1H	493187587	493187877
HORVU.MOREX.r3.1HG0083750	1H	493204035	493204319
HORVU.MOREX.r3.1HG0083770	1H	493210668	493210964
HORVU.MOREX.r3.1HG0083780	1H	493223784	493228317
HORVU.MOREX.r3.1HG0083800	1H	493289228	493298593
HORVU.MOREX.r3.1HG0083840	1H	493321340	493325176
HORVU.MOREX.r3.1HG0083860	1H	493416218	493417550
HORVU.MOREX.r3.1HG0083880	1H	493433718	493434547
HORVU.MOREX.r3.1HG0083900	1H	493441239	493443419
HORVU.MOREX.r3.1HG0083910	1H	493451557	493452052
HORVU.MOREX.r3.1HG0083920	1H	493455047	493456073
HORVU.MOREX.r3.1HG0083930	1H	493467188	493469400
HORVU.MOREX.r3.1HG0083950	1H	493532271	493535406
HORVU.MOREX.r3.1HG0083960	1H	493556724	493559350
HORVU.MOREX.r3.1HG0083970	1H	493562976	493565446
HORVU.MOREX.r3.1HG0083980	1H	493570801	493574608
HORVU.MOREX.r3.1HG0083990	1H	493581975	493583151
HORVU.MOREX.r3.1HG0084000	1H	493586592	493591472
HORVU.MOREX.r3.1HG0084010	1H	493683744	493684969
HORVU.MOREX.r3.1HG0084020	1H	493713161	493714339
HORVU.MOREX.r3.1HG0084040	1H	493736595	493736924
HORVU.MOREX.r3.1HG0084060	1H	493791938	493794313
HORVU.MOREX.r3.1HG0084090	1H	493816856	493821461
HORVU.MOREX.r3.1HG0084110	1H	493836276	493836497
HORVU.MOREX.r3.1HG0084120	1H	493870616	493871173
HORVU.MOREX.r3.1HG0084200	1H	493949028	493951146
HORVU.MOREX.r3.1HG0084210	1H	493976389	493978507
HORVU.MOREX.r3.1HG0084240	1H	494025758	494035244
HORVU.MOREX.r3.1HG0084300	1H	494050057	494051955
HORVU.MOREX.r3.1HG0084320	1H	494081270	494082775
HORVU.MOREX.r3.1HG0084340	1H	494084393	494086363
HORVU.MOREX.r3.1HG0084350	1H	494144663	494146290
HORVU.MOREX.r3.1HG0084360	1H	494146307	494151195
HORVU.MOREX.r3.1HG0084370	1H	494181071	494182565
HORVU.MOREX.r3.1HG0084390	1H	494233561	494234452
HORVU.MOREX.r3.1HG0084400	1H	494250563	494251057
HORVU.MOREX.r3.1HG0084460	1H	494296603	494300339
HORVU.MOREX.r3.1HG0084470	1H	494304093	494304520
HORVU.MOREX.r3.1HG0084480	1H	494328926	494330086
HORVU.MOREX.r3.1HG0084490	1H	494331986	494336081
HORVU.MOREX.r3.1HG0084510	1H	494418603	494422268
HORVU.MOREX.r3.1HG0084530	1H	494477956	494478882
HORVU.MOREX.r3.1HG0084540	1H	494482872	494485110
HORVU.MOREX.r3.1HG0084570	1H	494524958	494525468
HORVU.MOREX.r3.1HG0084580	1H	494544777	494545889
HORVU.MOREX.r3.1HG0084590	1H	494546080	494547585
HORVU.MOREX.r3.1HG0084600	1H	494548738	494551533
HORVU.MOREX.r3.1HG0084610	1H	494552686	494555481
HORVU.MOREX.r3.1HG0084620	1H	494556634	494560476
HORVU.MOREX.r3.1HG0084680	1H	494577792	494581404
HORVU.MOREX.r3.1HG0084690	1H	494610951	494611925
HORVU.MOREX.r3.1HG0084700	1H	494618029	494619251
HORVU.MOREX.r3.1HG0084710	1H	494619318	494620379
HORVU.MOREX.r3.1HG0084720	1H	494626805	494627767
HORVU.MOREX.r3.1HG0084730	1H	494627936	494629155
HORVU.MOREX.r3.1HG0084740	1H	494629882	494636460
HORVU.MOREX.r3.1HG0084760	1H	494674578	494676069
HORVU.MOREX.r3.1HG0084770	1H	494681598	494685708
HORVU.MOREX.r3.1HG0084780	1H	494687377	494688456
HORVU.MOREX.r3.1HG0084790	1H	494688507	494689319
HORVU.MOREX.r3.1HG0084840	1H	494727545	494727964
HORVU.MOREX.r3.1HG0084850	1H	494735823	494738748
HORVU.MOREX.r3.1HG0084860	1H	494776681	494780520
HORVU.MOREX.r3.1HG0084870	1H	494841650	494842968
HORVU.MOREX.r3.1HG0084890	1H	494851659	494856092
HORVU.MOREX.r3.1HG0084900	1H	494857338	494866155
HORVU.MOREX.r3.1HG0084920	1H	494869939	494872474
HORVU.MOREX.r3.1HG0084940	1H	494887277	494887680
HORVU.MOREX.r3.1HG0084970	1H	494997785	495003054
HORVU.MOREX.r3.1HG0084980	1H	495027246	495027856
HORVU.MOREX.r3.1HG0084990	1H	495100636	495103178
HORVU.MOREX.r3.1HG0085090	1H	495249779	495251957
HORVU.MOREX.r3.1HG0085100	1H	495260455	495262587
HORVU.MOREX.r3.1HG0085110	1H	495310383	495313248
HORVU.MOREX.r3.1HG0085120	1H	495322785	495329045
HORVU.MOREX.r3.1HG0085140	1H	495355314	495358364
HORVU.MOREX.r3.1HG0085150	1H	495409615	495410752
HORVU.MOREX.r3.1HG0085160	1H	495442735	495444115
HORVU.MOREX.r3.1HG0085200	1H	495490297	495490800
HORVU.MOREX.r3.1HG0085210	1H	495496231	495496602
HORVU.MOREX.r3.1HG0085220	1H	495500229	495500789
HORVU.MOREX.r3.1HG0085240	1H	495554261	495560557
HORVU.MOREX.r3.1HG0085260	1H	495567313	495567651
HORVU.MOREX.r3.1HG0085270	1H	495571728	495573664
HORVU.MOREX.r3.1HG0085300	1H	495598201	495604080
HORVU.MOREX.r3.1HG0085320	1H	495630369	495630884
HORVU.MOREX.r3.1HG0085330	1H	495633332	495634064
HORVU.MOREX.r3.1HG0085350	1H	495652329	495653375
HORVU.MOREX.r3.1HG0085380	1H	495673104	495678713
HORVU.MOREX.r3.1HG0085420	1H	495741036	495745600
HORVU.MOREX.r3.1HG0085430	1H	495750793	495752859
HORVU.MOREX.r3.1HG0085440	1H	495780695	495783144
HORVU.MOREX.r3.1HG0085460	1H	495847265	495848359
HORVU.MOREX.r3.1HG0085470	1H	495853418	495855011
HORVU.MOREX.r3.1HG0085480	1H	495887542	495888876
HORVU.MOREX.r3.1HG0085490	1H	495890826	495898192
HORVU.MOREX.r3.1HG0085530	1H	495922857	495926730
HORVU.MOREX.r3.1HG0085570	1H	496021573	496021833
HORVU.MOREX.r3.1HG0085590	1H	496122549	496124474
HORVU.MOREX.r3.1HG0085600	1H	496180571	496181773
HORVU.MOREX.r3.1HG0085640	1H	496275485	496276627
HORVU.MOREX.r3.1HG0085670	1H	496325544	496327246
HORVU.MOREX.r3.1HG0085680	1H	496330230	496349180
HORVU.MOREX.r3.1HG0085700	1H	496355249	496359096
HORVU.MOREX.r3.1HG0085710	1H	496389769	496394496
HORVU.MOREX.r3.1HG0085730	1H	496406615	496407373
HORVU.MOREX.r3.1HG0085740	1H	496422518	496423528
HORVU.MOREX.r3.1HG0085760	1H	496428184	496428948
HORVU.MOREX.r3.1HG0085780	1H	496449105	496452902
HORVU.MOREX.r3.1HG0085810	1H	496503302	496504435
HORVU.MOREX.r3.1HG0085820	1H	496512434	496513198
HORVU.MOREX.r3.1HG0085840	1H	496528135	496530348
HORVU.MOREX.r3.1HG0085870	1H	496538394	496540064
HORVU.MOREX.r3.1HG0085920	1H	496656000	496660230
HORVU.MOREX.r3.1HG0085940	1H	496712120	496712431
HORVU.MOREX.r3.1HG0085950	1H	496742852	496745248
HORVU.MOREX.r3.1HG0085960	1H	496746549	496752559
HORVU.MOREX.r3.1HG0085980	1H	496811001	496812284
HORVU.MOREX.r3.1HG0086000	1H	496868213	496872139
HORVU.MOREX.r3.1HG0086010	1H	496873303	496876327
HORVU.MOREX.r3.1HG0086090	1H	496941817	496949155
HORVU.MOREX.r3.1HG0086100	1H	496949508	496949921
HORVU.MOREX.r3.1HG0086120	1H	496968741	496969478
HORVU.MOREX.r3.1HG0086130	1H	497073997	497078371
HORVU.MOREX.r3.1HG0086140	1H	497112777	497116787
HORVU.MOREX.r3.1HG0086160	1H	497137253	497138623
HORVU.MOREX.r3.1HG0086170	1H	497149685	497151324
HORVU.MOREX.r3.1HG0086250	1H	497209669	497211573
HORVU.MOREX.r3.1HG0086260	1H	497219287	497220328
HORVU.MOREX.r3.1HG0086310	1H	497383786	497384394
HORVU.MOREX.r3.1HG0086330	1H	497406366	497408953
HORVU.MOREX.r3.1HG0086340	1H	497455871	497457355
HORVU.MOREX.r3.1HG0086350	1H	497462459	497466337
HORVU.MOREX.r3.1HG0086360	1H	497466576	497471251
HORVU.MOREX.r3.1HG0086370	1H	497473920	497475794
HORVU.MOREX.r3.1HG0086390	1H	497539305	497541121
HORVU.MOREX.r3.1HG0086410	1H	497614902	497616605
HORVU.MOREX.r3.1HG0086420	1H	497628735	497630474
HORVU.MOREX.r3.1HG0086430	1H	497634262	497648524
HORVU.MOREX.r3.1HG0086450	1H	497690503	497702165
HORVU.MOREX.r3.1HG0086460	1H	497745722	497749874
HORVU.MOREX.r3.1HG0086470	1H	497797569	497802352
HORVU.MOREX.r3.1HG0086530	1H	497831434	497833254
HORVU.MOREX.r3.1HG0086540	1H	497842852	497843720
HORVU.MOREX.r3.1HG0086560	1H	497874715	497881707
HORVU.MOREX.r3.1HG0086570	1H	497889567	497893235
HORVU.MOREX.r3.1HG0086590	1H	497934497	497938575
HORVU.MOREX.r3.1HG0086640	1H	498019327	498020361
HORVU.MOREX.r3.1HG0086670	1H	498040490	498045449
HORVU.MOREX.r3.1HG0086690	1H	498056877	498059184
HORVU.MOREX.r3.1HG0086700	1H	498090278	498091666
HORVU.MOREX.r3.1HG0086720	1H	498234746	498239117
HORVU.MOREX.r3.1HG0086730	1H	498240941	498251217
HORVU.MOREX.r3.1HG0086740	1H	498327840	498329611
HORVU.MOREX.r3.1HG0086790	1H	498348331	498348926
HORVU.MOREX.r3.1HG0086800	1H	498358495	498362471
HORVU.MOREX.r3.1HG0086820	1H	498389207	498392557
HORVU.MOREX.r3.1HG0086840	1H	498424083	498425088
HORVU.MOREX.r3.1HG0086900	1H	498461829	498463021
HORVU.MOREX.r3.1HG0086910	1H	498482806	498484299
HORVU.MOREX.r3.1HG0086920	1H	498523991	498525483
HORVU.MOREX.r3.1HG0086940	1H	498533918	498537446
HORVU.MOREX.r3.1HG0086980	1H	498607300	498607689
HORVU.MOREX.r3.1HG0087000	1H	498687322	498688716
HORVU.MOREX.r3.1HG0087020	1H	498763425	498764620
HORVU.MOREX.r3.1HG0087040	1H	498875352	498876782
HORVU.MOREX.r3.1HG0087050	1H	498892767	498893439
HORVU.MOREX.r3.1HG0087060	1H	498898817	498899095
HORVU.MOREX.r3.1HG0087070	1H	498962403	498963759
HORVU.MOREX.r3.1HG0087100	1H	498967065	498967672
HORVU.MOREX.r3.1HG0087130	1H	498993330	498993929
HORVU.MOREX.r3.1HG0087150	1H	499006879	499010239
HORVU.MOREX.r3.1HG0087170	1H	499022239	499029839
HORVU.MOREX.r3.1HG0087190	1H	499085435	499089233
HORVU.MOREX.r3.1HG0087230	1H	499101042	499101615
HORVU.MOREX.r3.1HG0087250	1H	499120767	499121315
HORVU.MOREX.r3.1HG0087260	1H	499124375	499128514
HORVU.MOREX.r3.1HG0087270	1H	499132589	499133605
HORVU.MOREX.r3.1HG0087290	1H	499170225	499173206
HORVU.MOREX.r3.1HG0087300	1H	499196274	499197854
HORVU.MOREX.r3.1HG0087310	1H	499198786	499200179
HORVU.MOREX.r3.1HG0087320	1H	499206660	499207576
HORVU.MOREX.r3.1HG0087360	1H	499284805	499289646
HORVU.MOREX.r3.1HG0087370	1H	499290543	499290797
HORVU.MOREX.r3.1HG0087380	1H	499291041	499291385
HORVU.MOREX.r3.1HG0087430	1H	499317821	499320445
HORVU.MOREX.r3.1HG0087450	1H	499357605	499370607
HORVU.MOREX.r3.1HG0087480	1H	499478768	499479472
HORVU.MOREX.r3.1HG0087580	1H	499570655	499572076
HORVU.MOREX.r3.1HG0087590	1H	499577938	499578805
HORVU.MOREX.r3.1HG0087600	1H	499608513	499617002
HORVU.MOREX.r3.1HG0087610	1H	499627329	499629826
HORVU.MOREX.r3.1HG0087620	1H	499643940	499645353
HORVU.MOREX.r3.1HG0087660	1H	499826427	499827077
HORVU.MOREX.r3.1HG0087670	1H	499871522	499877341
HORVU.MOREX.r3.1HG0087730	1H	499967846	499968340
HORVU.MOREX.r3.1HG0087740	1H	500003103	500003489
HORVU.MOREX.r3.1HG0087750	1H	500008830	500009615
HORVU.MOREX.r3.1HG0087790	1H	500021497	500024193
HORVU.MOREX.r3.1HG0087800	1H	500033886	500034543
HORVU.MOREX.r3.1HG0087810	1H	500044019	500045560
HORVU.MOREX.r3.1HG0087820	1H	500057570	500058439
HORVU.MOREX.r3.1HG0087840	1H	500140893	500142410
HORVU.MOREX.r3.1HG0087850	1H	500157912	500158481
HORVU.MOREX.r3.1HG0087860	1H	500158809	500159045
HORVU.MOREX.r3.1HG0087880	1H	500171926	500178083
HORVU.MOREX.r3.1HG0087890	1H	500178249	500181341
HORVU.MOREX.r3.1HG0087910	1H	500186573	500186989
HORVU.MOREX.r3.1HG0087940	1H	500232216	500232731
HORVU.MOREX.r3.1HG0087950	1H	500235172	500236359
HORVU.MOREX.r3.1HG0087960	1H	500251655	500254612
HORVU.MOREX.r3.1HG0087980	1H	500272616	500273349
HORVU.MOREX.r3.1HG0087990	1H	500275902	500276659
HORVU.MOREX.r3.1HG0088000	1H	500279144	500281966
HORVU.MOREX.r3.1HG0088020	1H	500341401	500342952
HORVU.MOREX.r3.1HG0088040	1H	500364726	500367974
HORVU.MOREX.r3.1HG0088060	1H	500376690	500379086
HORVU.MOREX.r3.1HG0088070	1H	500381517	500382788
HORVU.MOREX.r3.1HG0088100	1H	500408089	500408412
HORVU.MOREX.r3.1HG0088110	1H	500425484	500428342
HORVU.MOREX.r3.1HG0088140	1H	500458045	500459242
HORVU.MOREX.r3.1HG0088210	1H	500542143	500543053
HORVU.MOREX.r3.1HG0088230	1H	500593230	500594140
HORVU.MOREX.r3.1HG0088250	1H	500644318	500645228
HORVU.MOREX.r3.1HG0088310	1H	500733915	500741212
HORVU.MOREX.r3.1HG0088320	1H	500735897	500737234
HORVU.MOREX.r3.1HG0088330	1H	500741641	500743224
HORVU.MOREX.r3.1HG0088350	1H	500744449	500745213
HORVU.MOREX.r3.1HG0088370	1H	500754633	500756317
HORVU.MOREX.r3.1HG0088400	1H	500791440	500792504
HORVU.MOREX.r3.1HG0088410	1H	500818052	500819260
HORVU.MOREX.r3.1HG0088420	1H	500821107	500821775
HORVU.MOREX.r3.1HG0088440	1H	500836467	500840469
HORVU.MOREX.r3.1HG0088450	1H	500843053	500843565
HORVU.MOREX.r3.1HG0088460	1H	500879347	500880219
HORVU.MOREX.r3.1HG0088480	1H	500919942	500921513
HORVU.MOREX.r3.1HG0088540	1H	500997986	500999128
HORVU.MOREX.r3.1HG0088550	1H	501066955	501067863
HORVU.MOREX.r3.1HG0088560	1H	501084166	501084411
HORVU.MOREX.r3.1HG0088580	1H	501086163	501087920
HORVU.MOREX.r3.1HG0088590	1H	501090442	501093287
HORVU.MOREX.r3.1HG0088600	1H	501102976	501113408
HORVU.MOREX.r3.1HG0088620	1H	501124614	501126039
HORVU.MOREX.r3.1HG0088630	1H	501137401	501138703
HORVU.MOREX.r3.1HG0088650	1H	501142925	501143392
HORVU.MOREX.r3.1HG0088660	1H	501175461	501176561
HORVU.MOREX.r3.1HG0088680	1H	501207565	501210796
HORVU.MOREX.r3.1HG0088690	1H	501211120	501212260
HORVU.MOREX.r3.1HG0088750	1H	501440834	501443187
HORVU.MOREX.r3.1HG0088760	1H	501484533	501487212
HORVU.MOREX.r3.1HG0088770	1H	501505733	501506143
HORVU.MOREX.r3.1HG0088780	1H	501540987	501542404
HORVU.MOREX.r3.1HG0088790	1H	501578933	501581183
HORVU.MOREX.r3.1HG0088840	1H	501602212	501602454
HORVU.MOREX.r3.1HG0088860	1H	501605394	501605609
HORVU.MOREX.r3.1HG0088870	1H	501606090	501608572
HORVU.MOREX.r3.1HG0088890	1H	501684372	501686076
HORVU.MOREX.r3.1HG0088900	1H	501717756	501719380
HORVU.MOREX.r3.1HG0088920	1H	501726472	501728598
HORVU.MOREX.r3.1HG0088930	1H	501801786	501804942
HORVU.MOREX.r3.1HG0088960	1H	501856648	501861240
HORVU.MOREX.r3.1HG0088970	1H	501898052	501898860
HORVU.MOREX.r3.1HG0088990	1H	501912507	501921002
HORVU.MOREX.r3.1HG0089000	1H	501921972	501926548
HORVU.MOREX.r3.1HG0089010	1H	501932408	501935285
HORVU.MOREX.r3.1HG0089030	1H	501995634	501999750
HORVU.MOREX.r3.1HG0089050	1H	502043318	502044547
HORVU.MOREX.r3.1HG0089070	1H	502121357	502125542
HORVU.MOREX.r3.1HG0089120	1H	502502891	502503832
HORVU.MOREX.r3.1HG0089130	1H	502514594	502517638
HORVU.MOREX.r3.1HG0089140	1H	502552327	502554280
HORVU.MOREX.r3.1HG0089160	1H	502615530	502617615
HORVU.MOREX.r3.1HG0089170	1H	502618028	502621339
HORVU.MOREX.r3.1HG0089180	1H	502624017	502626375
HORVU.MOREX.r3.1HG0089190	1H	502630381	502631012
HORVU.MOREX.r3.1HG0089200	1H	502636914	502640822
HORVU.MOREX.r3.1HG0089250	1H	502850598	502851155
HORVU.MOREX.r3.1HG0089330	1H	502944855	502945622
HORVU.MOREX.r3.1HG0089370	1H	503042257	503042930
HORVU.MOREX.r3.1HG0089380	1H	503062951	503063445
HORVU.MOREX.r3.1HG0089390	1H	503240294	503248768
HORVU.MOREX.r3.1HG0089400	1H	503266608	503267852
HORVU.MOREX.r3.1HG0089420	1H	503286276	503287535
HORVU.MOREX.r3.1HG0089440	1H	503321782	503322538
HORVU.MOREX.r3.1HG0089450	1H	503397457	503398870
HORVU.MOREX.r3.1HG0089460	1H	503425301	503430730
HORVU.MOREX.r3.1HG0089480	1H	503466785	503471314
HORVU.MOREX.r3.1HG0089560	1H	503487566	503487922
HORVU.MOREX.r3.1HG0089570	1H	503555578	503557992
HORVU.MOREX.r3.1HG0089580	1H	503558591	503561715
HORVU.MOREX.r3.1HG0089590	1H	503561964	503566681
HORVU.MOREX.r3.1HG0089600	1H	503589523	503589789
HORVU.MOREX.r3.1HG0089620	1H	503602422	503602688
HORVU.MOREX.r3.1HG0089650	1H	503619485	503619751
HORVU.MOREX.r3.1HG0089660	1H	503623909	503624172
HORVU.MOREX.r3.1HG0089690	1H	503636029	503636295
HORVU.MOREX.r3.1HG0089710	1H	503640344	503641535
HORVU.MOREX.r3.1HG0089720	1H	503640857	503641048
HORVU.MOREX.r3.1HG0089730	1H	503641235	503641447
HORVU.MOREX.r3.1HG0089740	1H	503645102	503645365
HORVU.MOREX.r3.1HG0089750	1H	503646669	503647755
HORVU.MOREX.r3.1HG0089760	1H	503693773	503698179
HORVU.MOREX.r3.1HG0089770	1H	503713542	503714950
HORVU.MOREX.r3.1HG0089780	1H	503727123	503728571
HORVU.MOREX.r3.1HG0089800	1H	503854917	503855847
HORVU.MOREX.r3.1HG0089870	1H	503988948	503989583
HORVU.MOREX.r3.1HG0089900	1H	504155100	504157234
HORVU.MOREX.r3.1HG0089920	1H	504186311	504196951
HORVU.MOREX.r3.1HG0089930	1H	504205383	504205876
HORVU.MOREX.r3.1HG0089950	1H	504239389	504243642
HORVU.MOREX.r3.1HG0089970	1H	504296871	504298185
HORVU.MOREX.r3.1HG0089980	1H	504376584	504379022
HORVU.MOREX.r3.1HG0090000	1H	504388043	504388465
HORVU.MOREX.r3.1HG0090010	1H	504420893	504422150
HORVU.MOREX.r3.1HG0090020	1H	504427003	504427350
HORVU.MOREX.r3.1HG0090040	1H	504430949	504431909
HORVU.MOREX.r3.1HG0090060	1H	504486898	504488660
HORVU.MOREX.r3.1HG0090070	1H	504499465	504500523
HORVU.MOREX.r3.1HG0090090	1H	504518505	504518990
HORVU.MOREX.r3.1HG0090100	1H	504524727	504525725
HORVU.MOREX.r3.1HG0090110	1H	504529493	504529753
HORVU.MOREX.r3.1HG0090130	1H	504538441	504539360
HORVU.MOREX.r3.1HG0090140	1H	504548342	504550827
HORVU.MOREX.r3.1HG0090150	1H	504551285	504554791
HORVU.MOREX.r3.1HG0090160	1H	504621027	504623106
HORVU.MOREX.r3.1HG0090170	1H	504625819	504627672
HORVU.MOREX.r3.1HG0090180	1H	504631363	504633973
HORVU.MOREX.r3.1HG0090200	1H	504637579	504648400
HORVU.MOREX.r3.1HG0090260	1H	504656341	504657996
HORVU.MOREX.r3.1HG0090290	1H	504663463	504668582
HORVU.MOREX.r3.1HG0090300	1H	504695034	504706270
HORVU.MOREX.r3.1HG0090310	1H	504706594	504708311
HORVU.MOREX.r3.1HG0090320	1H	504717088	504720461
HORVU.MOREX.r3.1HG0090330	1H	504736545	504739929
HORVU.MOREX.r3.1HG0090340	1H	504809603	504810556
HORVU.MOREX.r3.1HG0090350	1H	504813974	504815010
HORVU.MOREX.r3.1HG0090370	1H	504825042	504832072
HORVU.MOREX.r3.1HG0090410	1H	504903798	504905766
HORVU.MOREX.r3.1HG0090460	1H	504967583	504968371
HORVU.MOREX.r3.1HG0090470	1H	504986482	504987705
HORVU.MOREX.r3.1HG0090480	1H	505020392	505021135
HORVU.MOREX.r3.1HG0090500	1H	505044459	505044785
HORVU.MOREX.r3.1HG0090510	1H	505044700	505048018
HORVU.MOREX.r3.1HG0090520	1H	505044833	505045597
HORVU.MOREX.r3.1HG0090540	1H	505085170	505085668
HORVU.MOREX.r3.1HG0090550	1H	505089215	505089526
HORVU.MOREX.r3.1HG0090590	1H	505117905	505119299
HORVU.MOREX.r3.1HG0090630	1H	505220196	505224320
HORVU.MOREX.r3.1HG0090640	1H	505265331	505265750
HORVU.MOREX.r3.1HG0090650	1H	505267826	505268386
HORVU.MOREX.r3.1HG0090660	1H	505295545	505295811
HORVU.MOREX.r3.1HG0090670	1H	505296663	505298216
HORVU.MOREX.r3.1HG0090700	1H	505317993	505320041
HORVU.MOREX.r3.1HG0090710	1H	505322018	505324842
HORVU.MOREX.r3.1HG0090720	1H	505533451	505535269
HORVU.MOREX.r3.1HG0090730	1H	505540591	505541085
HORVU.MOREX.r3.1HG0090740	1H	505554250	505560429
HORVU.MOREX.r3.1HG0090760	1H	505760174	505762699
HORVU.MOREX.r3.1HG0090770	1H	505765506	505765748
HORVU.MOREX.r3.1HG0090780	1H	505778031	505781621
HORVU.MOREX.r3.1HG0090810	1H	505843484	505844025
HORVU.MOREX.r3.1HG0090830	1H	505868286	505872093
HORVU.MOREX.r3.1HG0090850	1H	505948088	505949447
HORVU.MOREX.r3.1HG0090860	1H	505970218	505971440
HORVU.MOREX.r3.1HG0090870	1H	506015618	506017280
HORVU.MOREX.r3.1HG0090890	1H	506037527	506039376
HORVU.MOREX.r3.1HG0090910	1H	506058071	506060331
HORVU.MOREX.r3.1HG0090920	1H	506081496	506085740
HORVU.MOREX.r3.1HG0090930	1H	506143520	506148269
HORVU.MOREX.r3.1HG0090940	1H	506233507	506236371
HORVU.MOREX.r3.1HG0090950	1H	506272506	506274385
HORVU.MOREX.r3.1HG0090970	1H	506287742	506290348
HORVU.MOREX.r3.1HG0090990	1H	506296392	506302701
HORVU.MOREX.r3.1HG0091000	1H	506392618	506394069
HORVU.MOREX.r3.1HG0091010	1H	506443459	506447479
HORVU.MOREX.r3.1HG0091020	1H	506453906	506454590
HORVU.MOREX.r3.1HG0091030	1H	506465523	506465987
HORVU.MOREX.r3.1HG0091040	1H	506473888	506475218
HORVU.MOREX.r3.1HG0091050	1H	506478247	506479223
HORVU.MOREX.r3.1HG0091060	1H	506489254	506490353
HORVU.MOREX.r3.1HG0091070	1H	506496867	506498266
HORVU.MOREX.r3.1HG0091080	1H	506500624	506501422
HORVU.MOREX.r3.1HG0091090	1H	506504752	506506357
HORVU.MOREX.r3.1HG0091120	1H	506527314	506531767
HORVU.MOREX.r3.1HG0091130	1H	506534570	506535459
HORVU.MOREX.r3.1HG0091150	1H	506545453	506545959

## Sheet: BSR allVariants
targetRegion.1H_490293130-506553278.allVariants
Chr	Pos	Ref	Alt	Depth_F2B-R	Depth_F2Y-R	Index_F2B-R	Index_F2Y-R	Δindex
1H	490293130	G	A	24,13	13,20	0.351351	0.606061	0.254709
1H	490293132	G	A	25,13	13,22	0.342105	0.628571	0.286466
1H	490293134	T	C	25,14	13,23	0.358974	0.638889	0.279915
1H	490293201	A	G	46,40	17,41	0.465116	0.706897	0.24178
1H	490293289	T	C	40,52	51,14	0.565217	0.215385	0.349833
1H	490293314	AT	A	35,34	11,42	0.492754	0.792453	0.299699
1H	490293318	T	A	35,36	43,11	0.507042	0.203704	0.303339
1H	490293624	G	T	48,38	73,9	0.44186	0.109756	0.332104
1H	490293768	G	T	52,37	61,7	0.41573	0.102941	0.312789
1H	490293789	A	G	32,47	7,61	0.594937	0.897059	0.302122
1H	490294424	A	G	28,44	3,48	0.611111	0.941176	0.330065
1H	490294430	A	T	37,27	49,3	0.421875	0.0576923	0.364183
1H	490294433	G	T	36,26	47,3	0.419355	0.06	0.359355
1H	490294489	C	A	50,26	47,3	0.342105	0.06	0.282105
1H	490294540	A	T	37,21	45,0	0.362069	0	0.362069
1H	490294562	T	C	21,38	2,41	0.644068	0.953488	0.309421
1H	490356354	G	GCC	270,0	45,24	0	0.347826	0.347826
1H	490356433	C	A	270,0	67,40	0	0.373832	0.373832
1H	490357342	G	T	210,89	81,91	0.297659	0.52907	0.231411
1H	490357412	T	A	207,106	79,130	0.338658	0.62201	0.283351
1H	490357416	T	C	211,105	76,130	0.332278	0.631068	0.298789
1H	490357452	T	C	234,116	69,125	0.331429	0.64433	0.312901
1H	490357505	T	C	256,149	79,161	0.367901	0.670833	0.302932
1H	490357515	C	T	266,150	79,167	0.360577	0.678862	0.318285
1H	490357533	T	C	284,169	79,189	0.373068	0.705224	0.332155
1H	490357534	G	A	285,171	79,181	0.375	0.696154	0.321154
1H	490357536	G	A	283,163	80,179	0.365471	0.69112	0.325649
1H	490357728	T	C	350,272	101,371	0.437299	0.786017	0.348718
1H	490357773	C	T	341,254	98,351	0.426891	0.781737	0.354846
1H	490357978	A	C	391,349	102,465	0.471622	0.820106	0.348484
1H	490358277	C	T	358,339	101,417	0.48637	0.805019	0.318649
1H	490358403	T	C	366,341	89,474	0.48232	0.841918	0.359599
1H	490358460	G	A	359,346	91,452	0.49078	0.832413	0.341632
1H	490358633	A	G	217,238	285,52	0.523077	0.154303	0.368774
1H	490400206	C	T	190,161	51,204	0.458689	0.8	0.341311
1H	490400296	G	C	111,131	144,27	0.541322	0.157895	0.383428
1H	490448388	TCCTCCG	T	63,41	42,0	0.394231	0	0.394231
1H	490448405	A	C	42,64	4,93	0.603774	0.958763	0.354989
1H	490623454	A	G	82,24	23,29	0.226415	0.557692	0.331277
1H	490623926	T	C	55,12	10,24	0.179104	0.705882	0.526778
1H	490623957	A	G	48,8	10,20	0.142857	0.666667	0.52381
1H	490624187	C	A	57,11	10,20	0.161765	0.666667	0.504902
1H	490624254	G	A	9,50	18,14	0.847458	0.4375	0.409958
1H	490627290	A	G	50,22	5,28	0.305556	0.848485	0.542929
1H	490627292	G	T	50,22	5,28	0.305556	0.848485	0.542929
1H	490628035	A	G	48,23	10,34	0.323944	0.772727	0.448784
1H	490628068	G	C	44,24	10,39	0.352941	0.795918	0.442977
1H	490628127	T	C	22,12	6,32	0.352941	0.842105	0.489164
1H	490808567	TCGAG	T	309,135	75,165	0.304054	0.6875	0.383446
1H	490808679	C	G	945,434	235,701	0.314721	0.748932	0.434211
1H	490809416	C	T	445,212	153,480	0.322679	0.758294	0.435615
1H	490809441	A	G	544,257	171,573	0.320849	0.770161	0.449312
1H	490810725	G	T	1133,570	231,845	0.334703	0.785316	0.450613
1H	490810888	G	A	562,258	107,409	0.314634	0.792636	0.478002
1H	490810908	G	A	394,180	79,291	0.313589	0.786486	0.472898
1H	490811975	A	T	62,36	8,46	0.367347	0.851852	0.484505
1H	490811983	G	T	65,38	9,45	0.368932	0.833333	0.464401
1H	490812752	C	T	126,72	26,121	0.363636	0.823129	0.459493
1H	490813346	T	C	81,35	18,86	0.301724	0.826923	0.525199
1H	490814484	C	G	60,25	19,57	0.294118	0.75	0.455882
1H	490814641	G	A	68,39	23,47	0.364486	0.671429	0.306943
1H	490814672	G	T	85,34	27,53	0.285714	0.6625	0.376786
1H	490814723	T	G	65,23	22,43	0.261364	0.661538	0.400175
1H	490814733	G	C	60,21	17,43	0.259259	0.716667	0.457407
1H	490814772	G	C	40,10	14,25	0.2	0.641026	0.441026
1H	490901654	T	TCC	222,72	39,65	0.244898	0.625	0.380102
1H	490901765	G	T	501,203	67,158	0.288352	0.702222	0.41387
1H	490901824	C	G	377,176	63,169	0.318264	0.728448	0.410184
1H	490901833	C	T	371,162	68,163	0.30394	0.705628	0.401688
1H	490901877	C	T	237,110	50,119	0.317003	0.704142	0.387139
1H	490901911	T	C	229,108	52,125	0.320475	0.706215	0.38574
1H	490901995	C	T	150,73	33,93	0.327354	0.738095	0.410741
1H	490902027	A	G	116,78	29,97	0.402062	0.769841	0.367779
1H	490902180	T	C	106,52	27,81	0.329114	0.75	0.420886
1H	490902518	A	T	597,411	110,344	0.407738	0.757709	0.349971
1H	490902776	C	T	78,45	7,38	0.365854	0.844444	0.478591
1H	491092498	A	G	288,141	59,233	0.328671	0.797945	0.469274
1H	491095038	A	G	191,130	44,162	0.404984	0.786408	0.381423
1H	491119719	T	TC	288,58	76,145	0.16763	0.656109	0.488479
1H	491119730	G	GTT	220,44	63,97	0.166667	0.60625	0.439583
1H	491119902	T	C	340,79	85,190	0.188544	0.690909	0.502365
1H	491119965	G	A	324,64	75,160	0.164948	0.680851	0.515903
1H	491121109	C	A	229,50	68,134	0.179211	0.663366	0.484155
1H	491121792	T	C	435,75	107,260	0.147059	0.708447	0.561388
1H	491121974	G	T	284,42	66,153	0.128834	0.69863	0.569796
1H	491762311	A	G	30,27	7,42	0.473684	0.857143	0.383459
1H	491762478	G	T	28,15	5,34	0.348837	0.871795	0.522958
1H	491820111	GTGC	G	16,64	64,10	0.8	0.135135	0.664865
1H	491820119	GCTC	G	65,16	12,64	0.197531	0.842105	0.644574
1H	491820146	G	C	73,19	14,73	0.206522	0.83908	0.632559
1H	491820498	G	T	79,11	15,33	0.122222	0.6875	0.565278
1H	491820785	A	G	49,87	110,21	0.639706	0.160305	0.479401
1H	491824088	A	G	47,28	7,55	0.373333	0.887097	0.513763
1H	491970875	A	C	39,53	58,0	0.576087	0	0.576087
1H	491971163	C	T	18,36	50,13	0.666667	0.206349	0.460317
1H	491971272	T	C	12,29	44,13	0.707317	0.22807	0.479247
1H	491971365	G	A	19,43	51,13	0.693548	0.203125	0.490423
1H	491973419	G	A	77,89	83,11	0.536145	0.117021	0.419123
1H	491973585	C	T	48,43	68,0	0.472527	0	0.472527
1H	492036022	C	T	22,32	30,6	0.592593	0.166667	0.425926
1H	492036087	C	A	26,27	29,2	0.509434	0.0645161	0.444918
1H	492038884	T	A	31,25	6,26	0.446429	0.8125	0.366071
1H	492040941	G	C	7,27	27,3	0.794118	0.1	0.694118
1H	492041799	C	T	22,29	31,5	0.568627	0.138889	0.429739
1H	492041853	G	A	25,44	38,5	0.637681	0.116279	0.521402
1H	493925291	C	G	356,190	42,372	0.347985	0.898551	0.550565
1H	494084379	G	T	222,437	439,0	0.663126	0	0.663126
1H	494085842	A	G	392,687	119,0	0.636701	0	0.636701
1H	494085914	A	G	312,608	119,0	0.66087	0	0.66087
1H	494151042	G	T	89,159	86,0	0.641129	0	0.641129
1H	494419076	A	G	573,1327	1603,0	0.698421	0	0.698421
1H	494419681	G	A	462,1289	1124,102	0.736151	0.0831974	0.652953
1H	494420241	T	C	358,759	988,95	0.679499	0.0877193	0.591779
1H	494421982	C	T	158,359	206,0	0.694391	0	0.694391
1H	494422224	G	GGGGT	18,51	96,0	0.73913	0	0.73913
1H	494483921	A	T	28,98	93,0	0.777778	0	0.777778
1H	494484078	A	G	25,63	58,7	0.715909	0.107692	0.608217
1H	494484107	A	G	23,52	54,6	0.693333	0.1	0.593333
1H	494484395	A	G	16,20	50,0	0.555556	0	0.555556
1H	494484743	G	C	23,48	37,7	0.676056	0.159091	0.516965
1H	494484755	G	A	26,49	39,7	0.653333	0.152174	0.501159
1H	494578107	G	A	77,248	63,0	0.763077	0	0.763077
1H	494578193	C	A	63,193	63,0	0.753906	0	0.753906
1H	494578293	G	C	48,145	152,0	0.751295	0	0.751295
1H	494579022	G	A	72,203	204,0	0.738182	0	0.738182
1H	494579237	A	G	86,195	227,0	0.69395	0	0.69395
1H	494579408	T	C	73,186	154,18	0.718147	0.104651	0.613496
1H	494580945	G	A	54,141	148,16	0.723077	0.097561	0.625516
1H	494581269	G	C	59,171	57,0	0.743478	0	0.743478
1H	494618346	C	A	46,128	154,0	0.735632	0	0.735632
1H	494618442	A	G	47,127	160,14	0.729885	0.0804598	0.649425
1H	494618825	G	A	106,179	246,22	0.62807	0.0820896	0.545981
1H	494618892	C	G	89,149	228,28	0.62605	0.109375	0.516675
1H	494619030	T	C	45,56	112,9	0.554455	0.0743802	0.480075
1H	494619045	C	T	43,50	107,9	0.537634	0.0775862	0.460048
1H	494619076	T	C	26,24	55,4	0.48	0.0677966	0.412203
1H	494683881	T	C	269,450	469,0	0.625869	0	0.625869
1H	494685398	T	TG	140,329	349,31	0.701493	0.0815789	0.619914
1H	494738197	C	T	16,71	57,9	0.816092	0.136364	0.679728
1H	494738272	C	T	17,81	56,11	0.826531	0.164179	0.662352
1H	494738589	AG	A	10,33	39,0	0.767442	0	0.767442
1H	494851804	A	T	58,95	71,8	0.620915	0.101266	0.519649
1H	494851922	A	C	39,69	43,3	0.638889	0.0652174	0.573671
1H	494869225	C	G	25,54	39,4	0.683544	0.0930233	0.590521
1H	494869226	G	C	25,54	39,4	0.683544	0.0930233	0.590521
1H	494869505	C	T	48,128	85,8	0.727273	0.0860215	0.641251
1H	494870320	C	G	145,309	243,20	0.680617	0.0760456	0.604571
1H	494870344	G	A	145,337	250,24	0.69917	0.0875912	0.611579
1H	494871400	A	G	189,499	372,38	0.725291	0.0926829	0.632608
1H	494872393	A	G	108,258	300,27	0.704918	0.0825688	0.622349
1H	494898386	G	A	27,36	46,9	0.571429	0.163636	0.407792
1H	494898426	T	C	25,41	47,11	0.621212	0.189655	0.431557
1H	494898445	C	G	24,41	54,11	0.630769	0.169231	0.461538
1H	494898492	G	C	67,85	122,18	0.559211	0.128571	0.430639
1H	494898510	C	CA	67,91	128,19	0.575949	0.129252	0.446698
1H	494898898	G	A	206,447	421,44	0.684533	0.0946237	0.589909
1H	494998107	T	C	55,17	5,57	0.236111	0.919355	0.683244
1H	494998225	C	T	17,64	55,7	0.790123	0.112903	0.67722
1H	494999913	G	T	96,25	5,70	0.206612	0.933333	0.726722
1H	495002691	G	A	52,95	105,0	0.646259	0	0.646259
1H	495102128	A	G	247,100	11,173	0.288184	0.940217	0.652033
1H	495102424	T	C	105,216	162,15	0.672897	0.0847458	0.588151
1H	495102568	G	A	129,243	181,0	0.653226	0	0.653226
1H	495102636	C	A	123,278	99,0	0.693267	0	0.693267
1H	495322921	C	G	29,21	6,26	0.42	0.8125	0.3925
1H	495325118	T	C	107,41	8,104	0.277027	0.928571	0.651544
1H	495325157	C	T	96,35	8,86	0.267176	0.914894	0.647718
1H	495325160	C	T	95,34	8,85	0.263566	0.913978	0.650413
1H	495326084	G	A	98,36	10,100	0.268657	0.909091	0.640434
1H	495326339	T	C	58,23	7,77	0.283951	0.916667	0.632716
1H	495328091	A	G	111,63	5,138	0.362069	0.965035	0.602966
1H	495328372	A	G	114,55	5,136	0.325444	0.964539	0.639095
1H	495328591	A	C	121,51	5,155	0.296512	0.96875	0.672238
1H	495328666	A	G	134,58	8,154	0.302083	0.950617	0.648534
1H	495328762	C	T	115,48	6,100	0.294479	0.943396	0.648918
1H	495328912	T	C	43,15	4,26	0.258621	0.866667	0.608046
1H	495356315	C	T	22,12	4,31	0.352941	0.885714	0.532773
1H	495356497	A	G	25,12	3,53	0.324324	0.946429	0.622104
1H	495356720	G	A	42,14	8,76	0.25	0.904762	0.654762
1H	495358026	GCGA	G	53,9	1,47	0.145161	0.979167	0.834005
1H	496109344	G	A	43,18	37,0	0.295082	0	0.295082
1H	496110323	C	G	135,463	106,0	0.774247	0	0.774247
1H	496110341	T	C	144,497	106,0	0.775351	0	0.775351
1H	496110555	G	A	93,287	106,0	0.755263	0	0.755263
1H	496110865	C	T	33,94	89,0	0.740157	0	0.740157
1H	496111792	A	C	284,660	33,0	0.699153	0	0.699153
1H	496111828	T	G	262,652	606,63	0.713348	0.0941704	0.619178
1H	496111829	T	C	256,614	658,0	0.705747	0	0.705747
1H	496111949	A	G	214,533	658,0	0.713521	0	0.713521
1H	496113529	G	GA	177,255	433,63	0.590278	0.127016	0.463262
1H	496113597	A	G	236,258	565,0	0.522267	0	0.522267
1H	496113703	G	A	146,286	98,0	0.662037	0	0.662037
1H	496122859	T	A	33,85	86,19	0.720339	0.180952	0.539387
1H	496123081	T	G	11,50	41,10	0.819672	0.196078	0.623594
1H	496123103	G	C	13,51	46,12	0.796875	0.206897	0.589978
1H	496123241	T	C	17,40	42,10	0.701754	0.192308	0.509447
1H	496123244	T	C	17,40	43,10	0.701754	0.188679	0.513075
1H	496123289	C	G	22,44	46,5	0.666667	0.0980392	0.568627
1H	496123335	T	C	21,47	45,7	0.691176	0.134615	0.556561
1H	496123538	G	C	14,40	89,0	0.740741	0	0.740741
1H	496123622	T	C	19,38	88,0	0.666667	0	0.666667
1H	496123637	T	C	18,36	86,0	0.666667	0	0.666667
1H	496123796	T	G	16,33	48,5	0.673469	0.0943396	0.57913
1H	496123797	T	A	16,33	48,5	0.673469	0.0943396	0.57913
1H	496181048	C	T	24,76	69,0	0.76	0	0.76
1H	496181624	G	C	56,154	53,0	0.733333	0	0.733333
1H	496181679	A	G	47,152	53,0	0.763819	0	0.763819
1H	496181713	A	T	37,116	53,0	0.75817	0	0.75817
1H	496275353	G	C	30,64	61,0	0.680851	0	0.680851
1H	496275946	T	C	13,44	34,6	0.77193	0.15	0.62193
1H	496276085	A	G	19,62	34,9	0.765432	0.209302	0.55613
1H	496276386	A	C	30,70	45,9	0.7	0.166667	0.533333
1H	496276565	T	G	27,55	56,13	0.670732	0.188406	0.482326
1H	496276616	T	C	21,25	36,7	0.543478	0.162791	0.380688
1H	496945327	G	A	9,27	44,0	0.75	0	0.75
1H	497206018	T	C	70,16	1,43	0.186047	0.977273	0.791226
1H	497206051	C	A	62,12	1,39	0.162162	0.975	0.812838
1H	497206068	C	A	54,12	0,30	0.181818	1	0.818182
1H	497206443	G	A	28,12	2,28	0.3	0.933333	0.633333
1H	497209807	T	G	273,34	13,49	0.110749	0.790323	0.679573
1H	497209863	C	G	235,29	9,71	0.109848	0.8875	0.777652
1H	497210202	C	T	141,34	8,91	0.194286	0.919192	0.724906
1H	497210244	T	C	169,47	8,119	0.217593	0.937008	0.719415
1H	497210383	A	C	269,73	12,199	0.21345	0.943128	0.729678
1H	497210454	G	A	314,98	19,257	0.237864	0.931159	0.693295
1H	497210734	A	G	497,146	20,318	0.227061	0.940828	0.713768
1H	497211093	A	G	384,131	10,203	0.254369	0.953052	0.698683
1H	497211135	T	C	418,157	19,257	0.273043	0.931159	0.658116
1H	497211225	C	T	503,187	23,292	0.271014	0.926984	0.65597
1H	497211270	G	T	473,163	18,251	0.256289	0.933086	0.676796
1H	497211274	T	C	476,163	18,249	0.255086	0.932584	0.677498
1H	497211285	C	A	472,159	18,262	0.251981	0.935714	0.683733
1H	497211321	A	G	455,146	20,290	0.242928	0.935484	0.692555
1H	497211325	A	G	456,144	19,288	0.24	0.938111	0.698111
1H	497462667	T	C	27,77	35,0	0.740385	0	0.740385
1H	497464669	G	C	32,98	95,0	0.753846	0	0.753846
1H	497464718	T	C	26,98	95,0	0.790323	0	0.790323
1H	497465033	G	A	36,113	95,0	0.758389	0	0.758389
1H	497466660	A	C	15,32	44,0	0.680851	0	0.680851
1H	497466688	A	G	22,43	47,0	0.661538	0	0.661538
1H	497466700	C	T	24,45	47,0	0.652174	0	0.652174
1H	497471203	TCGGCGGCGG	T	24,72	43,0	0.75	0	0.75
1H	497539460	G	A	16,16	36,0	0.5	0	0.5
1H	497539634	C	G	42,30	80,0	0.416667	0	0.416667
1H	497539977	C	A	28,20	80,0	0.416667	0	0.416667
1H	497540074	C	T	33,40	51,0	0.547945	0	0.547945
1H	497540101	T	C	32,30	51,0	0.483871	0	0.483871
1H	497540202	C	T	28,57	51,0	0.670588	0	0.670588
1H	497540312	G	A	31,63	51,0	0.670213	0	0.670213
1H	497540375	G	C	38,61	51,0	0.616162	0	0.616162
1H	497540398	G	A	36,52	51,0	0.590909	0	0.590909
1H	497540430	T	C	26,45	45,0	0.633803	0	0.633803
1H	497745890	A	T	18,12	57,0	0.4	0	0.4
1H	497745934	T	C	25,7	57,0	0.21875	0	0.21875
1H	497748619	C	T	20,51	55,0	0.71831	0	0.71831
1H	497748642	G	A	16,50	55,0	0.757576	0	0.757576
1H	497748648	G	T	19,50	55,0	0.724638	0	0.724638
1H	497748653	A	G	18,51	55,0	0.73913	0	0.73913
1H	497748690	G	A	16,36	55,0	0.692308	0	0.692308
1H	497749476	G	C	11,26	44,0	0.702703	0	0.702703
1H	497749480	C	G	10,26	44,0	0.722222	0	0.722222
1H	497803587	T	C	24,74	58,0	0.755102	0	0.755102
1H	497831643	C	G	25,27	48,0	0.519231	0	0.519231
1H	497831743	G	GGA	33,30	48,0	0.47619	0	0.47619
1H	497831909	A	G	54,42	48,0	0.4375	0	0.4375
1H	497832530	A	G	32,29	48,0	0.47541	0	0.47541
1H	497833013	G	A	26,18	48,0	0.409091	0	0.409091
1H	497833086	GCCT	G	33,22	48,0	0.4	0	0.4
1H	497833122	A	C	34,24	48,0	0.413793	0	0.413793
1H	497833227	T	C	14,18	31,0	0.5625	0	0.5625
1H	497843097	G	A	16,189	46,0	0.921951	0	0.921951
1H	497843151	G	C	18,238	40,0	0.929688	0	0.929688
1H	497935282	GT	G	10,68	55,0	0.871795	0	0.871795
1H	497937438	T	C	30,97	66,0	0.76378	0	0.76378
1H	497937505	A	G	30,98	66,0	0.765625	0	0.765625
1H	497938090	C	T	28,90	74,0	0.762712	0	0.762712
1H	497938237	G	T	39,104	64,0	0.727273	0	0.727273
1H	497938242	C	T	39,104	64,0	0.727273	0	0.727273
1H	497938285	CG	C	41,82	64,0	0.666667	0	0.666667
1H	497938305	T	C	80,41	0,74	0.338843	1	0.661157
1H	497938383	AT	A	41,19	1,47	0.316667	0.979167	0.6625
1H	497938387	T	C	49,20	1,47	0.289855	0.979167	0.689312
1H	498019393	GCGCCTCACGCCGTCGTGC	G	23,15	34,0	0.394737	0	0.394737
1H	498019561	C	T	79,20	0,37	0.20202	1	0.79798
1H	498235096	C	T	26,85	42,0	0.765766	0	0.765766
1H	498235135	T	A	24,80	37,0	0.769231	0	0.769231
1H	498237228	G	A	27,67	57,0	0.712766	0	0.712766
1H	498238075	A	G	25,58	39,0	0.698795	0	0.698795
1H	498238154	G	C	23,41	39,0	0.640625	0	0.640625
1H	498238160	C	T	24,39	39,0	0.619048	0	0.619048
1H	498238175	C	T	22,35	34,0	0.614035	0	0.614035
1H	498244170	T	A	242,119	1,257	0.32964	0.996124	0.666484
1H	498244242	G	A	108,213	251,0	0.663551	0	0.663551
1H	498245672	T	C	61,153	103,0	0.714953	0	0.714953
1H	498247478	C	T	79,172	141,0	0.685259	0	0.685259
1H	498248701	A	G	43,150	148,0	0.777202	0	0.777202
1H	498248743	C	G	177,56	2,257	0.240343	0.992278	0.751935
1H	498248873	G	A	176,87	0,266	0.330798	1	0.669202
1H	498249126	G	A	83,197	198,0	0.703571	0	0.703571
1H	498249446	G	A	129,72	0,197	0.358209	1	0.641791
1H	498249509	T	A	158,70	0,198	0.307018	1	0.692982
1H	498250679	G	C	36,68	46,0	0.653846	0	0.653846
1H	498524681	T	C	56,32	0,45	0.363636	1	0.636364
1H	498525092	G	A	57,139	53,0	0.709184	0	0.709184
1H	498534463	C	A	61,27	0,154	0.306818	1	0.693182
1H	499022335	C	T	27,112	47,0	0.805755	0	0.805755
1H	499029805	C	T	174,45	0,159	0.205479	1	0.794521
1H	499085541	TCCTC	T	11,25	0,72	0.694444	1	0.305556
1H	499085652	G	T	70,64	2,130	0.477612	0.984848	0.507237
1H	499085694	C	T	83,63	0,133	0.431507	1	0.568493
1H	499200123	C	G	7,33	47,0	0.825	0	0.825
1H	499261943	A	G	11,70	35,0	0.864198	0	0.864198
1H	499261961	A	G	11,73	31,0	0.869048	0	0.869048
1H	499271257	T	G	82,142	104,0	0.633929	0	0.633929
1H	499271282	G	A	82,152	61,0	0.649573	0	0.649573
1H	499271556	C	A	90,33	1,57	0.268293	0.982759	0.714466
1H	499271786	C	A	33,69	54,0	0.676471	0	0.676471
1H	499271929	C	T	134,54	0,70	0.287234	1	0.712766
1H	499271948	T	G	69,146	87,0	0.67907	0	0.67907
1H	499271981	T	C	164,70	2,118	0.299145	0.983333	0.684188
1H	499272631	G	T	195,127	2,160	0.39441	0.987654	0.593244
1H	499273008	G	C	51,52	66,0	0.504854	0	0.504854
1H	499273022	G	C	48,68	66,0	0.586207	0	0.586207
1H	499276179	A	G	4,28	30,0	0.875	0	0.875
1H	499276518	G	A	137,31	0,58	0.184524	1	0.815476
1H	499276520	G	C	140,33	0,59	0.190751	1	0.809249
1H	499276525	T	C	139,34	0,60	0.196532	1	0.803468
1H	499276747	G	A	55,173	66,0	0.758772	0	0.758772
1H	499280493	T	C	31,66	43,0	0.680412	0	0.680412
1H	499280583	T	A	37,72	43,0	0.66055	0	0.66055
1H	499280690	T	A	44,45	39,0	0.505618	0	0.505618
1H	499280714	G	C	41,35	39,0	0.460526	0	0.460526
1H	499280721	T	C	38,34	39,0	0.472222	0	0.472222
1H	499284839	C	T	40,102	112,0	0.71831	0	0.71831
1H	499285196	T	G	979,1835	1752,0	0.652097	0	0.652097
1H	499285205	G	C	1044,1928	1752,0	0.648721	0	0.648721
1H	499285919	C	G	325,627	508,0	0.658613	0	0.658613
1H	499286004	G	A	772,1346	508,0	0.635505	0	0.635505
1H	499286022	G	A	869,1463	508,0	0.627358	0	0.627358
1H	499286043	C	A	982,1655	508,0	0.627607	0	0.627607
1H	499286067	C	T	911,1484	508,0	0.619624	0	0.619624
1H	499286278	A	G	260,398	460,0	0.604863	0	0.604863
1H	499286305	G	A	314,420	460,0	0.572207	0	0.572207
1H	499286308	A	G	330,453	460,0	0.578544	0	0.578544
1H	499289077	C	G	373,428	495,0	0.534332	0	0.534332
1H	499289316	T	C	347,195	357,0	0.359779	0	0.359779
1H	499317572	C	A	73,160	106,0	0.686695	0	0.686695
1H	499317730	C	G	1510,587	7,1598	0.279924	0.995639	0.715715
1H	499317796	CA	C	764,1689	1602,0	0.688545	0	0.688545
1H	499317875	A	G	751,1867	1602,0	0.71314	0	0.71314
1H	499317923	G	A	1977,802	16,2301	0.288593	0.993095	0.704501
1H	499318034	C	A	1093,2363	223,0	0.683738	0	0.683738
1H	499318463	A	G	38,154	223,0	0.802083	0	0.802083
1H	499318486	C	CA	38,143	223,0	0.790055	0	0.790055
1H	499318618	C	T	138,52	2,311	0.273684	0.99361	0.719926
1H	499318743	C	G	69,157	299,0	0.69469	0	0.69469
1H	499319144	C	T	45,140	304,0	0.756757	0	0.756757
1H	499319376	A	T	46,159	304,0	0.77561	0	0.77561
1H	499319765	G	A	553,1335	50,0	0.707097	0	0.707097
1H	499358083	G	A	30,17	0,52	0.361702	1	0.638298
1H	499358386	G	C	26,32	48,0	0.551724	0	0.551724
1H	499360454	C	T	34,19	0,115	0.358491	1	0.641509
1H	499360882	C	T	43,21	0,109	0.328125	1	0.671875
1H	499363219	T	C	57,26	0,110	0.313253	1	0.686747
1H	499364655	T	C	68,30	0,98	0.306122	1	0.693878
1H	499364661	C	A	68,31	0,96	0.313131	1	0.686869
1H	499364702	C	T	54,27	0,88	0.333333	1	0.666667
1H	499364886	C	T	47,69	86,0	0.594828	0	0.594828
1H	499365339	G	T	41,101	117,0	0.711268	0	0.711268
1H	499365648	G	A	138,40	0,144	0.224719	1	0.775281
1H	499366762	T	C	92,37	0,149	0.286822	1	0.713178
1H	499367453	C	T	58,89	144,0	0.605442	0	0.605442
1H	499369478	G	T	44,131	71,0	0.748571	0	0.748571
1H	499370324	C	T	124,65	0,142	0.343915	1	0.656085
1H	499370558	T	A	38,17	0,31	0.309091	1	0.690909
1H	499577963	T	C	8,30	0,37	0.789474	1	0.210526
1H	499577987	T	C	37,29	59,0	0.439394	0	0.439394
1H	499578026	G	T	61,113	59,0	0.649425	0	0.649425
1H	499578033	G	A	86,124	59,0	0.590476	0	0.590476
1H	499578034	C	T	86,126	59,0	0.59434	0	0.59434
1H	499578038	GA	G	91,207	59,0	0.694631	0	0.694631
1H	499578172	G	A	197,640	59,0	0.764636	0	0.764636
1H	499578535	C	G	715,194	0,496	0.213421	1	0.786579
1H	499578747	C	T	173,620	41,0	0.781841	0	0.781841
1H	499608677	C	T	33,11	0,34	0.25	1	0.75
1H	499611224	A	T	42,105	139,0	0.714286	0	0.714286
1H	499615246	C	T	58,154	164,0	0.726415	0	0.726415
1H	499616385	G	A	264,99	1,302	0.272727	0.9967	0.723972
1H	499616568	G	A	92,214	213,0	0.699346	0	0.699346
1H	499616646	C	T	232,97	0,253	0.294833	1	0.705167
1H	499616883	C	T	117,43	0,109	0.26875	1	0.73125
1H	499616884	C	G	117,43	0,108	0.26875	1	0.73125
1H	500272727	C	CAT	125,182	110,0	0.592834	0	0.592834
1H	500272754	A	T	207,542	110,0	0.723632	0	0.723632
1H	500272780	C	T	609,243	0,622	0.285211	1	0.714789
1H	500272860	G	C	1033,191	0,477	0.156046	1	0.843954
1H	500272872	C	G	1012,183	2,477	0.153138	0.995825	0.842687
1H	500272914	G	A	453,964	899,0	0.680311	0	0.680311
1H	500272998	C	T	917,1037	1404,0	0.530706	0	0.530706
1H	500273034	G	T	1728,675	17,1591	0.280899	0.989428	0.708529
1H	500273145	G	A	696,1036	903,0	0.598152	0	0.598152
1H	500273250	C	CT	443,499	903,0	0.529724	0	0.529724
1H	500276056	T	C	175,38	1,54	0.178404	0.981818	0.803414
1H	500276072	T	A	219,52	0,92	0.191882	1	0.808118
1H	500276093	A	G	249,76	0,149	0.233846	1	0.766154
1H	500276209	T	G	141,384	285,310	0.731429	0.521008	0.21042
1H	500276227	A	C	421,120	427,205	0.221811	0.324367	0.102556
1H	500276228	G	A	121,420	207,425	0.77634	0.672468	0.103872
1H	500276249	G	C	544,222	330,0	0.289817	0	0.289817
1H	500276306	C	T	342,127	330,0	0.270789	0	0.270789
1H	500276336	G	A	28,106	5,230	0.791045	0.978723	0.187679
1H	500276393	A	G	234,481	188,0	0.672727	0	0.672727
1H	500276574	C	T	226,53	341,299	0.189964	0.467187	0.277223
1H	500733242	C	A	54,13	0,57	0.19403	1	0.80597
1H	501608512	A	C	53,78	61,0	0.59542	0	0.59542
1H	501856597	G	GT	76,10	77,23	0.116279	0.23	0.113721
1H	501995704	CCGCCAT	C	23,16	37,0	0.410256	0	0.410256
1H	501998935	T	C	23,94	96,12	0.803419	0.111111	0.692308
1H	501998959	G	A	28,113	131,14	0.801418	0.0965517	0.704867
1H	502043414	G	A	7,30	26,4	0.810811	0.133333	0.677477
1H	502043443	C	G	5,39	29,6	0.886364	0.171429	0.714935
1H	502043457	G	A	4,43	29,6	0.914894	0.171429	0.743465
1H	502043755	T	C	2,42	24,9	0.954545	0.272727	0.681818
1H	502043816	G	T	3,29	25,7	0.90625	0.21875	0.6875
1H	502044364	G	A	7,23	24,8	0.766667	0.25	0.516667
1H	502044393	T	C	6,28	28,8	0.823529	0.222222	0.601307
1H	502044473	G	GAGA	6,46	32,8	0.884615	0.2	0.684615
1H	502197486	C	A	35,10	36,0	0.222222	0	0.222222
1H	502197491	T	TA	16,15	41,0	0.483871	0	0.483871
1H	502197655	C	T	12,39	37,0	0.764706	0	0.764706
1H	503240393	T	C	174,74	17,135	0.298387	0.888158	0.589771
1H	503430531	C	G	1079,2355	2296,310	0.685789	0.118956	0.566833
1H	504241161	T	C	8,33	33,0	0.804878	0	0.804878
1H	504377013	A	ACAGAT	23,57	40,0	0.7125	0	0.7125
1H	504377296	G	A	14,18	39,0	0.5625	0	0.5625
1H	504378181	T	G	8,25	25,5	0.757576	0.166667	0.590909
1H	504378208	G	A	8,27	30,5	0.771429	0.142857	0.628571
1H	504378791	AGATG	A	7,25	37,0	0.78125	0	0.78125
1H	504420979	G	C	438,265	36,0	0.376956	0	0.376956
1H	504420991	T	G	393,331	467,77	0.457182	0.141544	0.315638
1H	504825006	C	T	60,135	104,22	0.692308	0.174603	0.517705
1H	505267867	G	C	21,43	53,0	0.671875	0	0.671875
1H	505267877	T	G	23,59	59,0	0.719512	0	0.719512
1H	505268000	TGGCG	T	135,115	62,0	0.46	0	0.46
1H	505268011	A	C	141,125	62,0	0.469925	0	0.469925
1H	505268056	G	T	163,199	407,0	0.549724	0	0.549724
1H	505268341	G	C	175,298	358,39	0.630021	0.0982368	0.531784
1H	505296783	A	C	27,53	25,6	0.6625	0.193548	0.468952
1H	505296795	C	G	29,58	29,6	0.666667	0.171429	0.495238
1H	505298123	T	C	26,56	28,5	0.682927	0.151515	0.531412
1H	505322146	T	A	15,35	39,0	0.7	0	0.7
1H	505322291	C	T	39,70	67,16	0.642202	0.192771	0.449431
1H	505322393	G	A	36,71	82,12	0.663551	0.12766	0.535892
1H	505323061	T	C	44,75	77,8	0.630252	0.0941176	0.536134
1H	505324705	G	GGGCGGGGC	17,14	59,0	0.451613	0	0.451613
1H	505555253	C	T	20,66	73,10	0.767442	0.120482	0.64696
1H	505555969	T	C	31,65	72,11	0.677083	0.13253	0.544553
1H	505778201	T	A	66,157	145,21	0.704036	0.126506	0.57753
1H	506544887	A	G	134,251	145,25	0.651948	0.147059	0.504889
1H	506545039	A	C	206,505	232,57	0.710267	0.197232	0.513035
1H	506545439	T	C	691,1603	981,171	0.698779	0.148438	0.550342
1H	506545961	CA	C	703,1580	948,172	0.692072	0.153571	0.5385
1H	506546054	T	G	114,389	171,36	0.77336	0.173913	0.599447
1H	506550600	G	A	16,20	68,0	0.555556	0	0.555556
1H	506550627	T	G	13,29	69,5	0.690476	0.0675676	0.622909
1H	506550644	T	C	19,29	74,6	0.604167	0.075	0.529167
1H	506550903	C	G	19,43	79,11	0.693548	0.122222	0.571326
1H	506551490	A	G	16,50	112,15	0.757576	0.11811	0.639466
1H	506551512	T	C	15,47	107,17	0.758065	0.137097	0.620968
1H	506551518	A	G	16,50	101,18	0.757576	0.151261	0.606315
1H	506551852	A	G	22,39	98,0	0.639344	0	0.639344
1H	506552078	C	T	19,19	79,0	0.5	0	0.5
1H	506552222	C	T	18,20	71,9	0.526316	0.1125	0.413816
1H	506552231	G	A	18,22	76,10	0.55	0.116279	0.433721
1H	506552279	G	A	21,27	96,12	0.5625	0.111111	0.451389
1H	506552297	C	T	20,25	89,9	0.555556	0.0918367	0.463719
1H	506552315	C	G	17,29	85,9	0.630435	0.0957447	0.53469
1H	506552459	G	A	28,47	82,12	0.626667	0.12766	0.499007
1H	506552498	G	T	27,36	83,11	0.571429	0.117021	0.454407
1H	506552513	T	C	24,34	80,11	0.586207	0.120879	0.465328
1H	506552526	G	A	29,35	87,12	0.546875	0.121212	0.425663
1H	506552733	C	T	32,37	78,15	0.536232	0.16129	0.374942
1H	506552798	G	C	28,26	88,14	0.481481	0.137255	0.344227
1H	506552852	C	T	25,26	82,19	0.509804	0.188119	0.321685
1H	506552984	G	A	14,51	82,15	0.784615	0.154639	0.629976
1H	506553011	G	A	11,53	93,18	0.828125	0.162162	0.665963
1H	506553140	T	C	21,43	94,20	0.671875	0.175439	0.496436
1H	506553278	A	G	28,32	85,13	0.533333	0.132653	0.40068

## Sheet: DEG info
GeneID	F2B-R	F2Y-R	logFC	Pvalue	FDR	NR_def	GO	KO_ID	KO_gene	KO_Hyperlink		KEGG_Pathway	KOG_ID	KOG_Description	Swiss-Prot_Id	Swiss-Prot_Annotation
novel.20576	39.65	0	-14.0606	3.3833e-22	8.1709e-18	hypothetical protein MTR_0021s0160 [Medicago truncatula]	*	*	*	*		*	*	*	*	*
novel.20661	18.56	0	-10.4558	1.124e-11	6.7865e-08	unnamed protein product [Triticum turgidum subsp. durum]	*	*	*	*		*	*	*	*	*
novel.9030	1.62	0	-9.2348	2.0435e-08	4.9352e-05	predicted protein [Hordeum vulgare subsp. vulgare]	*	*	*	*		*	*	*	*	*
HORVU.MOREX.r3.7HG0640740	1.44	0	-9.2001	2.5623e-08	5.1568e-05	predicted protein, partial [Hordeum vulgare subsp. vulgare]	*	*	*	*		*	*	*	sp|Q53QK0|Y1103_ORYSJ	flavonoid O-methyltransferase-like protein Os11g0303600 OS=Oryza sativa subsp. japonica OX=39947 GN=Os11g0303600 PE=2 SV=1
novel.20797	2.2	0	-8.9927	7.5958e-08	0.00011465	hypothetical protein CMV_007046 [Castanea mollissima]	*	*	*	*		*	*	*	*	*
HORVU.MOREX.r3.1HG0088450	5.43	0	-8.3041	3.5408e-06	0.0025913	unnamed protein product [Triticum aestivum]	*	*	*	*		*	*	*	*	*
novel.13893	0.72	0	-8.271	3.5408e-06	0.0025913	mediator of RNA polymerase II transcription subunit 4 [Hordeum vulgare]	GO:0003712(transcription coregulator activity);GO:0006357(regulation of transcription by RNA polymerase II);GO:0016592(mediator complex);GO:0070847(core mediator complex)	*	*	*		*	*	*	sp|Q9LZ00|MED4_ARATH	Mediator of RNA polymerase II transcription subunit 4 OS=Arabidopsis thaliana OX=3702 GN=MED4 PE=1 SV=1
HORVU.MOREX.r3.3HG0317610	0.9	0	-8.2372	4.2784e-06	0.0029522	putative 2-succinyl-6-hydroxy-2,4-cyclohexadiene-1-carboxylate synthase [Hordeum vulgare]	*	*	*	*		*	*	*	sp|Q52532|MHPC_PSESP	2-hydroxy-6-oxononadienedioate/2-hydroxy-6-oxononatrienedioate hydrolase OS=Pseudomonas sp. OX=306 GN=mhpC PE=3 SV=1
novel.8050	4.59	0	-8.0156	1.4459e-05	0.0076659	*	*	*	*	*		*	*	*	*	*
HORVU.MOREX.r3.3HG0220680	0.84	0	-7.9751	1.7986e-05	0.008705	predicted protein [Hordeum vulgare subsp. vulgare]	*	*	*	*		*	*	*	sp|P93604|LRK10_WHEAT	Rust resistance kinase Lr10 OS=Triticum aestivum OX=4565 GN=LRK10 PE=2 SV=1
HORVU.MOREX.r3.UnG0753020	0.84	0	-7.9751	1.7986e-05	0.008705	predicted protein [Hordeum vulgare subsp. vulgare]	*	*	*	*		*	*	*	sp|P93604|LRK10_WHEAT	Rust resistance kinase Lr10 OS=Triticum aestivum OX=4565 GN=LRK10 PE=2 SV=1
HORVU.MOREX.r3.6HG0632270	2.76	0	-7.8008	3.568e-05	0.014362	unnamed protein product [Digitaria exilis]	*	*	*	*		*	*	*	sp|Q6K7R2|PIRL6_ORYSJ	Plant intracellular Ras-group-related LRR protein 6 OS=Oryza sativa subsp. japonica OX=39947 GN=IRL6 PE=2 SV=1
HORVU.MOREX.r3.2HG0197450	7.08	0	-7.7537	4.5324e-05	0.017103	hypothetical protein D1007_35904 [Hordeum vulgare]	*	*	*	*		*	*	*	*	*
HORVU.MOREX.r3.6HG0628400	0.46	0	-7.6546	7.4461e-05	0.024976	predicted protein [Hordeum vulgare subsp. vulgare]	*	*	*	*		*	*	*	sp|Q84TG3|PUB23_ARATH	E3 ubiquitin-protein ligase PUB23 OS=Arabidopsis thaliana OX=3702 GN=PUB23 PE=1 SV=1
novel.20985	0.65	0.01	-7.492	0.00012556	0.034855	hypothetical protein CQW23_33674 [Capsicum baccatum]	*	*	*	*		*	*	*	*	*
HORVU.MOREX.r3.1HG0075710	15.25	0.68	-5.0984	1.3447e-05	0.0073808	hypothetical protein D1007_48275 [Hordeum vulgare]	*	*	*	*		*	*	*	*	*
novel.20525	4.61	0.21	-4.9402	2.6946e-05	0.012051	hypothetical protein CQW23_31306 [Capsicum baccatum]	*	*	*	*		*	*	*	*	*
HORVU.MOREX.r3.7HG0726410	1.04	0.04	-4.5402	2.844e-05	0.012265	Cytokinin-O-glucosyltransferase 2 [Hordeum vulgare]	*	*	*	*		*	*	*	sp|A0A2Z5CV93|U70G2_CROXC	Myricetin 3-O-rhamnoside 1,2-glucosyltransferase UGT709G2 OS=Crocosmia x crocosmiiflora OX=1053288 GN=UGT709G2 PE=1 SV=1	杨梅黄酮
novel.14780	3.86	0.21	-4.1012	8.8189e-08	0.00011833	hypothetical protein D1007_47769 [Hordeum vulgare]	*	*	*	*		*	*	*	sp|O81283|TC159_ARATH	Translocase of chloroplast 159, chloroplastic OS=Arabidopsis thaliana OX=3702 GN=TOC159 PE=1 SV=1
HORVU.MOREX.r3.3HG0321630	1.32	0.07	-4.0263	6.7662e-05	0.023015	basic helix-loop-helix protein [Hordeum vulgare subsp. vulgare]	*	*	*	*		*	*	*	sp|A2WZ60|IRO2_ORYSI	Protein IRON-RELATED TRANSCRIPTION FACTOR 2 OS=Oryza sativa subsp. indica OX=39946 GN=IRO2 PE=3 SV=1
HORVU.MOREX.r3.3HG0314860	2.7	0.19	-3.7745	1.0214e-05	0.0063253	3-hydroxybenzoate 6-hydroxylase 1 [Hordeum vulgare]	GO:0071949(FAD binding)	*	*	*		*	*	*	sp|O81816|MO2_ARATH	Monooxygenase 2 OS=Arabidopsis thaliana OX=3702 GN=MO2 PE=2 SV=1
novel.11595	3.52	0.3	-3.4204	7.5556e-06	0.0050687	Zinc finger CCCH domain-containing protein 20 [Hordeum vulgare]	*	*	*	*		*	*	*	sp|Q0DVU4|C3H20_ORYSJ	Zinc finger CCCH domain-containing protein 20 OS=Oryza sativa subsp. japonica OX=39947 GN=Os03g0112700 PE=2 SV=1	photoperiodic control of flowering time
novel.2447	3.16	0.35	-3.1069	0.00015274	0.041448	uncharacterized protein LOC109752967 [Aegilops tauschii subsp. tauschii]	*	*	*	*		*	*	*	*	*
novel.21072	544.85	121.96	-2.9287	4.9554e-05	0.018133	hypothetical protein CQW23_31306 [Capsicum baccatum]	*	*	*	*		*	*	*	*	*
novel.21073	544.85	121.96	-2.9287	4.9554e-05	0.018133	hypothetical protein CQW23_31306 [Capsicum baccatum]	*	*	*	*		*	*	*	*	*
HORVU.MOREX.r3.2HG0127970	1.71	11.96	2.8389	9.8774e-05	0.028399	hypothetical protein D1007_22773 [Hordeum vulgare]	*	*	*	*		*	*	*	*	*
HORVU.MOREX.r3.2HG0104780	1.25	9.06	2.9079	7.7975e-05	0.025182	unnamed protein product [Triticum turgidum subsp. durum]	*	*	*	*		*	*	*	sp|P00871|RBS1_WHEAT	Ribulose bisphosphate carboxylase small chain PWS4.3, chloroplastic OS=Triticum aestivum OX=4565 PE=3 SV=2
HORVU.MOREX.r3.7HG0735010	3.23	26.21	2.9113	6.7523e-05	0.023015	unnamed protein product [Triticum turgidum subsp. durum]	*	*	*	*		*	*	*	*	*
novel.7899	1.26	10.04	2.9415	0.0001896	0.049159	hypothetical protein D1007_03504 [Hordeum vulgare]	GO:0016021(integral component of membrane)	*	*	*		*	*	*	*	*
HORVU.MOREX.r3.4HG0408730	0.63	4.34	2.9573	7.6942e-05	0.025182	predicted protein [Hordeum vulgare subsp. vulgare]	GO:0046872(metal ion binding);GO:0051213(dioxygenase activity)	*	*	*		*	*	*	sp|Q94LP4|ODD11_ORYSJ	2-oxoglutarate-dependent dioxygenase 11 OS=Oryza sativa subsp. japonica OX=39947 GN=2ODD11 PE=1 SV=1
HORVU.MOREX.r3.5HG0481860	1.12	9	3.0076	7.9579e-05	0.025182	predicted protein [Hordeum vulgare subsp. vulgare]	*	*	*	*		*	*	*	sp|P14897|ELI9_HORVU	Low molecular mass early light-inducible protein HV90, chloroplastic OS=Hordeum vulgare OX=4513 PE=2 SV=1
novel.14037	0.33	2.74	3.0931	0.00013833	0.037963	predicted protein [Hordeum vulgare subsp. vulgare]	*	*	*	*		*	*	*	*	*
HORVU.MOREX.r3.3HG0296370	0.49	4.15	3.0969	9.4802e-05	0.028381	non-specific lipid transfer protein GPI-anchored 2-like [Hordeum vulgare]	GO:0016021(integral component of membrane)	*	*	*		*	*	*	sp|Q9LZH5|LTPG2_ARATH	Non-specific lipid transfer protein GPI-anchored 2 OS=Arabidopsis thaliana OX=3702 GN=LTPG2 PE=2 SV=1
HORVU.MOREX.r3.3HG0313470	1.83	16.47	3.148	2.7783e-05	0.0122	predicted protein [Hordeum vulgare subsp. vulgare]	*	*	*	*		*	*	*	*	*
HORVU.MOREX.r3.6HG0601160	0.47	4.59	3.3322	1.4601e-05	0.0076659	predicted protein [Hordeum vulgare subsp. vulgare]	*	*	*	*		*	*	*	sp|Q6H676|EXB11_ORYSJ	Expansin-B11 OS=Oryza sativa subsp. japonica OX=39947 GN=EXPB11 PE=2 SV=1
HORVU.MOREX.r3.2HG0195550	0.27	3.07	3.4411	0.00019337	0.049159	RecName: Full=Cold-regulated protein 2 [Hordeum vulgare]	*	*	*	*		*	*	*	sp|P23252|CR2_HORVU	Cold-regulated protein 2 (Fragment) OS=Hordeum vulgare OX=4513 PE=2 SV=1
HORVU.MOREX.r3.7HG0653450	0.17	1.86	3.5071	3.9974e-05	0.015762	predicted protein [Hordeum vulgare subsp. vulgare]	GO:0006629(lipid metabolic process);GO:0016021(integral component of membrane);GO:0016298(lipase activity);GO:0016788(hydrolase activity, acting on ester bonds)	*	*	*		*	*	*	sp|Q9FJ45|GDL83_ARATH	GDSL esterase/lipase At5g45910 OS=Arabidopsis thaliana OX=3702 GN=At5g45910 PE=2 SV=1
HORVU.MOREX.r3.6HG0538670	0.07	0.86	3.6206	2.931e-05	0.012419	L-type lectin-domain containing receptor kinase IX.2-like [Aegilops tauschii subsp. tauschii]	GO:0004672(protein kinase activity);GO:0005524(ATP binding);GO:0016021(integral component of membrane);GO:0030246(carbohydrate binding)	*	*	*		*	*	*	sp|Q9LSL5|LRK92_ARATH	L-type lectin-domain containing receptor kinase IX.2 OS=Arabidopsis thaliana OX=3702 GN=LECRK92 PE=1 SV=1
HORVU.MOREX.r3.7HG0676790	0.12	1.52	3.6816	5.9769e-05	0.02092	predicted protein [Hordeum vulgare subsp. vulgare]	*	*	*	*		*	*	*	*	*
HORVU.MOREX.r3.2HG0105520	0.12	1.57	3.6863	9.8614e-05	0.028399	unnamed protein product [Triticum turgidum subsp. durum]	*	*	*	*		*	*	*	*	*
HORVU.MOREX.r3.7HG0718850	0.2	2.73	3.855	1.6146e-06	0.0016248	predicted protein [Hordeum vulgare subsp. vulgare]	*	*	*	*		*	*	*	sp|Q5QJ60|CYND4_CYNDA	Berberine bridge enzyme-like Cyn d 4 OS=Cynodon dactylon OX=28909 PE=1 SV=1
HORVU.MOREX.r3.3HG0295060	0.19	3.02	3.9029	8.0289e-05	0.025182	predicted protein [Hordeum vulgare subsp. vulgare]	*	*	*	*		*	*	*	*	*
HORVU.MOREX.r3.7HG0637560	0.22	3.96	4.1004	1.1891e-05	0.0066788	putative pectinesterase inhibitor domain containing protein [Hordeum vulgare]	*	*	*	*		*	*	*	*	*
HORVU.MOREX.r3.7HG0637570	0.22	3.96	4.1004	1.1891e-05	0.0066788	putative pectinesterase inhibitor domain containing protein [Hordeum vulgare]	*	*	*	*		*	*	*	*	*
HORVU.MOREX.r3.7HG0749250	0.13	2.19	4.1491	1.5435e-06	0.0016208	UPF0481 protein [Hordeum vulgare]	GO:0016021(integral component of membrane)	*	*	*		*	*	*	sp|Q9SD53|Y3720_ARATH	UPF0481 protein At3g47200 OS=Arabidopsis thaliana OX=3702 GN=At3g47200 PE=2 SV=1
HORVU.MOREX.r3.4HG0390450	0.09	1.72	4.2162	1.71e-05	0.008705	predicted protein [Hordeum vulgare subsp. vulgare]	GO:0004623(phospholipase A2 activity);GO:0005509(calcium ion binding);GO:0005576(extracellular region);GO:0006644(phospholipid metabolic process);GO:0008289(lipid binding);GO:0016042(lipid catabolic process);GO:0050482(arachidonic acid secretion)	*	*	*		*	*	*	sp|Q9XG81|PLA22_ORYSJ	Probable phospholipase A2 homolog 2 OS=Oryza sativa subsp. japonica OX=39947 GN=PLA2-II PE=1 SV=1
HORVU.MOREX.r3.2HG0105400	0.12	2.28	4.2469	3.0578e-06	0.0025723	hypothetical protein D1007_58710 [Hordeum vulgare]	*	*	*	*		*	*	*	*	*
HORVU.MOREX.r3.3HG0226220	0.04	0.86	4.2774	1.1219e-05	0.0066788	predicted protein [Hordeum vulgare subsp. vulgare]	GO:0009664(plant-type cell wall organization);GO:0009832(plant-type cell wall biogenesis);GO:0010215(cellulose microfibril organization);GO:0046658(anchored component of plasma membrane);GO:0052324(plant-type cell wall cellulose biosynthetic process)	*	*	*		*	*	*	sp|A2XHZ9|COBL5_ORYSI	COBRA-like protein 5 OS=Oryza sativa subsp. indica OX=39946 GN=BC1 PE=2 SV=1
HORVU.MOREX.r3.5HG0481950	0.06	1.44	4.4167	9.5017e-05	0.028381	predicted protein, partial [Hordeum vulgare subsp. vulgare]	*	*	*	*		*	*	*	sp|P14897|ELI9_HORVU	Low molecular mass early light-inducible protein HV90, chloroplastic OS=Hordeum vulgare OX=4513 PE=2 SV=1
HORVU.MOREX.r3.7HG0639650	0.11	2.67	4.5248	3.0888e-06	0.0025723	predicted protein [Hordeum vulgare subsp. vulgare]	*	*	*	*		*	*	*	*	*
HORVU.MOREX.r3.4HG0354070	0.02	0.5	4.7054	2.2876e-05	0.010625	hypothetical protein D1007_05907 [Hordeum vulgare]	GO:0005829(cytosol);GO:0008017(microtubule binding)	*	*	*		*	*	*	*	*
HORVU.MOREX.r3.6HG0629070	0.07	2.82	5.4411	5.6448e-09	1.7041e-05	GDSL esterase/lipase [Hordeum vulgare]	*	*	*	*		*	*	*	sp|Q8LB81|GDL79_ARATH	GDSL esterase/lipase At5g33370 OS=Arabidopsis thaliana OX=3702 GN=At5g33370 PE=2 SV=1
HORVU.MOREX.r3.5HG0446040	0.03	1.55	5.7199	8.2641e-08	0.0001174	COBRA-like protein 5 [Hordeum vulgare]	GO:0009664(plant-type cell wall organization);GO:0009832(plant-type cell wall biogenesis);GO:0010215(cellulose microfibril organization);GO:0046658(anchored component of plasma membrane);GO:0052324(plant-type cell wall cellulose biosynthetic process)	*	*	*		*	*	*	sp|A2XHZ9|COBL5_ORYSI	COBRA-like protein 5 OS=Oryza sativa subsp. indica OX=39946 GN=BC1 PE=2 SV=1
HORVU.MOREX.r3.1HG0089480	0.01	0.53	5.7691	2.1431e-06	0.0020703	predicted protein [Hordeum vulgare subsp. vulgare]	*	*	*	*		*	*	*	sp|Q9MAP7|SBT35_ARATH	Subtilisin-like protease SBT3.5 OS=Arabidopsis thaliana OX=3702 GN=SBT3.5 PE=1 SV=1
HORVU.MOREX.r3.1HG0093680	0.28	16.83	5.8698	3.8791e-11	1.8737e-07	RNase S-like protein [Hordeum vulgare]	GO:0003723(RNA binding);GO:0004521(endoribonuclease activity);GO:0005576(extracellular region);GO:0006401(RNA catabolic process);GO:0031410(cytoplasmic vesicle);GO:0033897(ribonuclease T2 activity)	*	*	*		*	*	*	sp|P42815|RNS3_ARATH	Ribonuclease 3 OS=Arabidopsis thaliana OX=3702 GN=RNS3 PE=2 SV=1
HORVU.MOREX.r3.UnG0753110	0	0.65	7.6465	9.6361e-05	0.028381	predicted protein [Hordeum vulgare subsp. vulgare]	*	*	*	*		*	*	*	sp|P93604|LRK10_WHEAT	Rust resistance kinase Lr10 OS=Triticum aestivum OX=4565 GN=LRK10 PE=2 SV=1
HORVU.MOREX.r3.UnG0753120	0	0.65	7.6465	9.6361e-05	0.028381	predicted protein [Hordeum vulgare subsp. vulgare]	*	*	*	*		*	*	*	sp|P93604|LRK10_WHEAT	Rust resistance kinase Lr10 OS=Triticum aestivum OX=4565 GN=LRK10 PE=2 SV=1
HORVU.MOREX.r3.5HG0520270	0	1.02	7.7714	4.5324e-05	0.017103	hypothetical protein D1007_29883 [Hordeum vulgare]	*	*	*	*		*	*	*	*	*
HORVU.MOREX.r3.5HG0475560	0	0.73	8.092	1.1679e-05	0.0066788	hypothetical protein D1007_06137 [Hordeum vulgare]	*	*	*	*		*	*	*	*	*
novel.20526	0	0.52	8.3137	3.5408e-06	0.0025913	hypothetical protein Lal_00042261 [Lupinus albus]	GO:0005739(mitochondrion)	*	*	*		*	*	*	*	*
HORVU.MOREX.r3.2HG0168120	0	1.01	8.3542	2.9406e-06	0.0025723	Abscisic stress-ripening protein 2 [Hordeum vulgare]	*	*	*	*		*	*	*	sp|A2ZBV1|ASR5_ORYSI	Abscisic stress-ripening protein 5 OS=Oryza sativa subsp. indica OX=39946 GN=ASR5 PE=2 SV=1
novel.20737	0	6.32	9.2267	2.2867e-08	5.0207e-05	hypothetical protein MTR_0021s0160 [Medicago truncatula]	*	*	*	*		*	*	*	*	*
novel.20535	0	1.14	9.4299	7.0785e-09	1.8995e-05	hypothetical protein Lal_00042261 [Lupinus albus]	GO:0005739(mitochondrion)	*	*	*		*	*	*	*	*
novel.20751	0	5.48	11.7272	2.7961e-15	2.251e-11	hypothetical protein Lal_00042261 [Lupinus albus]	GO:0005739(mitochondrion)	*	*	*		*	*	*	*	*
novel.14781	0	3.67	12.3475	4.243e-17	5.1237e-13	hypothetical protein D1007_47769 [Hordeum vulgare]	*	*	*	*		*	*	*	sp|O81283|TC159_ARATH	Translocase of chloroplast 159, chloroplastic OS=Arabidopsis thaliana OX=3702 GN=TOC159 PE=1 SV=1
HORVU.MOREX.r3.3HG0224180	0	0.48	8.1392	9.4751e-06	0.0060219	predicted protein [Hordeum vulgare subsp. vulgare]	GO:0008375(acetylglucosaminyltransferase activity);GO:0016020(membrane)	*	*	*		*	KOG0799	Branching enzyme	sp|Q9FLD7|GT14A_ARATH	Beta-glucuronosyltransferase GlcAT14A OS=Arabidopsis thaliana OX=3702 GN=GLCAT14A PE=2 SV=1
HORVU.MOREX.r3.1HG0087150	2.54	0.15	-4.0229	8.3129e-07	0.00095602	nucleotide pyrophosphatase [Hordeum vulgare]	*	*	*	*		*	KOG1378	Purple acid phosphatase	sp|Q5MAU8|PPA27_ARATH	Probable inactive purple acid phosphatase 27 OS=Arabidopsis thaliana OX=3702 GN=PAP27 PE=2 SV=1
HORVU.MOREX.r3.4HG0400910	2.19	0.07	-4.9351	1.2723e-07	0.00016172	flavin-containing monooxygenase FMO GS-OX1 [Hordeum vulgare]	*	*	*	*		*	KOG1399	flavin-containing monooxygenase	sp|Q9FLK4|GSXL8_ARATH	flavin-containing monooxygenase FMO GS-OX-like 8 OS=Arabidopsis thaliana OX=3702 GN=At5g61290 PE=1 SV=1	黄素单加氧酶 Vb2
HORVU.MOREX.r3.2HG0134440	0.82	0	-7.705	5.7914e-05	0.020569	predicted protein, partial [Hordeum vulgare subsp. vulgare]	GO:0016020(membrane);GO:0016298(lipase activity)	*	*	*		*	KOG1455	Lysophospholipase	sp|Q9C942|CSE_ARATH	Caffeoylshikimate esterase OS=Arabidopsis thaliana OX=3702 GN=CSE PE=1 SV=1	咖啡酰基莽草酸酯酶
HORVU.MOREX.r3.5HG0519330	20.7	2.91	-2.9238	9.3888e-05	0.028381	pathogenesis-related protein 1-6 [Hordeum vulgare]	*	*	*	*		*	KOG3017	Defense-related protein containing SCP domain	sp|Q05968|PR1_HORVU	Pathogenesis-related protein 1 OS=Hordeum vulgare OX=4513 PE=2 SV=1
HORVU.MOREX.r3.7HG0653340	2.05	0.12	-3.9985	2.4077e-05	0.010972	GDSL esterase/lipase [Hordeum vulgare]	*	*	*	*		*	KOG3035	Isoamyl acetate-hydrolyzing esterase	sp|Q6NMR9|GDL84_ARATH	GDSL esterase/lipase At5g45920 OS=Arabidopsis thaliana OX=3702 GN=At5g45920 PE=2 SV=1
HORVU.MOREX.r3.2HG0103930	0.3	2.59	3.1587	4.0464e-05	0.015762	unnamed protein product [Triticum turgidum subsp. durum]	*	K00485	FMO	http://www.genome.jp/dbget-bin/www_bget?ko:K00485		*	KOG1399	flavin-containing monooxygenase	sp|Q9LMA1|FMO1_ARATH	Probable flavin-containing monooxygenase 1 OS=Arabidopsis thaliana OX=3702 GN=FMO1 PE=2 SV=1	黄素单加氧酶 Vb2
HORVU.MOREX.r3.1HG0093670	0.89	24.31	4.8067	1.3253e-09	4.5725e-06	RNase S-like protein precursor [Hordeum vulgare subsp. vulgare]	GO:0003723(RNA binding);GO:0004521(endoribonuclease activity);GO:0005576(extracellular region);GO:0006401(RNA catabolic process);GO:0033897(ribonuclease T2 activity)	K01166	E3.1.27.1	http://www.genome.jp/dbget-bin/www_bget?ko:K01166		*	*	*	sp|P42813|RNS1_ARATH	Ribonuclease 1 OS=Arabidopsis thaliana OX=3702 GN=RNS1 PE=1 SV=1
HORVU.MOREX.r3.3HG0302520	0.07	0.79	3.6069	5.5863e-05	0.020136	predicted protein [Hordeum vulgare subsp. vulgare]	GO:0004322(ferroxidase activity);GO:0005507(copper ion binding);GO:0005886(plasma membrane);GO:0006826(iron ion transport);GO:0046274(lignin catabolic process);GO:0048046(apoplast);GO:0052716(hydroquinone:oxygen oxidoreductase activity);GO:0055072(iron ion homeostasis)	K05909	E1.10.3.2	http://www.genome.jp/dbget-bin/www_bget?ko:K05909	lignin	*	*	*	sp|B9FJH4|LAC12_ORYSJ	Laccase-12 OS=Oryza sativa subsp. japonica OX=39947 GN=LAC12 PE=3 SV=2
HORVU.MOREX.r3.6HG0606340	0	0.54	8.3936	2.4505e-06	0.0022763	predicted protein [Hordeum vulgare subsp. vulgare]	*	K14638	SLC15A3_4, PHT	http://www.genome.jp/dbget-bin/www_bget?ko:K14638		*	*	*	sp|P46032|PTR2_ARATH	Protein NRT1/ PTR FAMILY 8.3 OS=Arabidopsis thaliana OX=3702 GN=NPF8.3 PE=1 SV=1
HORVU.MOREX.r3.4HG0342040	1.15	7.12	2.6883	0.00019242	0.049159	cysteine endopeptidase EP-A [Hordeum vulgare]	GO:0004197(cysteine-type endopeptidase activity);GO:0005615(extracellular space);GO:0005764(lysosome);GO:0051603(proteolysis involved in cellular protein catabolic process)	K16292	CEP, CYSEP	http://www.genome.jp/dbget-bin/www_bget?ko:K16292		*	*	*	sp|O65039|CYSEP_RICCO	Vignain OS=Ricinus communis OX=3988 GN=CYSEP PE=1 SV=1
HORVU.MOREX.r3.3HG0280910	0.06	0.95	4.1497	3.2277e-06	0.0025913	65-kDa microtubule-associated protein 3 [Hordeum vulgare]	GO:0000226(microtubule cytoskeleton organization);GO:0008017(microtubule binding)	K16732	PRC1	http://www.genome.jp/dbget-bin/www_bget?ko:K16732		*	*	*	sp|Q9FHM4|MA653_ARATH	65-kDa microtubule-associated protein 3 OS=Arabidopsis thaliana OX=3702 GN=MAP65-3 PE=1 SV=1
HORVU.MOREX.r3.3HG0315930	5.56	46.31	3.0633	1.9718e-05	0.0093376	predicted protein [Hordeum vulgare subsp. vulgare]	*	K18883	ROMT	http://www.genome.jp/dbget-bin/www_bget?ko:K18883	lignin	*	KOG1663	O-methyltransferase	sp|Q9XGP7|OMT15_ORYSJ	Tricin synthase 1 OS=Oryza sativa subsp. japonica OX=39947 GN=ROMT-15 PE=1 SV=1	小麦黄素
HORVU.MOREX.r3.2HG0106770	1.87	0.02	-5.7032	4.9511e-08	7.9716e-05	unnamed protein product [Triticum turgidum subsp. durum]	GO:0000287(magnesium ion binding);GO:0005829(cytosol);GO:0016831(carboxy-lyase activity);GO:0030976(thiamine pyrophosphate binding)	K01568	E4.1.1.1, pdc	http://www.genome.jp/dbget-bin/www_bget?ko:K01568	Glucose	ko00010(Glycolysis / Gluconeogenesis)	KOG1184	Thiamine pyrophosphate-requiring enzyme	sp|A2XFI3|PDC2_ORYSI	Pyruvate decarboxylase 2 OS=Oryza sativa subsp. indica OX=39946 GN=PDC2 PE=2 SV=2
HORVU.MOREX.r3.2HG0106810	1.87	0.02	-5.7032	4.9511e-08	7.9716e-05	unnamed protein product [Triticum turgidum subsp. durum]	GO:0000287(magnesium ion binding);GO:0005829(cytosol);GO:0016831(carboxy-lyase activity);GO:0030976(thiamine pyrophosphate binding)	K01568	E4.1.1.1, pdc	http://www.genome.jp/dbget-bin/www_bget?ko:K01568	Glucose	ko00010(Glycolysis / Gluconeogenesis)	KOG1184	Thiamine pyrophosphate-requiring enzyme	sp|A2XFI3|PDC2_ORYSI	Pyruvate decarboxylase 2 OS=Oryza sativa subsp. indica OX=39946 GN=PDC2 PE=2 SV=2
HORVU.MOREX.r3.2HG0188010	0.35	2.86	3.0702	0.00010701	0.030405	predicted protein [Hordeum vulgare subsp. vulgare]	*	K01213	E3.2.1.67	http://www.genome.jp/dbget-bin/www_bget?ko:K01213	Glucose	ko00040(Pentose and glucuronate interconversions)	*	*	sp|Q8RY29|ADPG2_ARATH	Polygalacturonase ADPG2 OS=Arabidopsis thaliana OX=3702 GN=ADPG2 PE=2 SV=2
HORVU.MOREX.r3.6HG0542050	0.03	0.48	3.9029	8.0289e-05	0.025182	putative beta-fructofuranosidase [Hordeum vulgare subsp. vulgare]	*	K01193	E3.2.1.26, sacA	http://www.genome.jp/dbget-bin/www_bget?ko:K01193	Glucose	ko00052(Galactose metabolism);ko00500(Starch and sucrose metabolism)	KOG0228	Beta-fructofuranosidase (invertase)	sp|Q9FSV7|SST_FESAR	Sucrose:sucrose 1-fructosyltransferase OS=Festuca arundinacea OX=4606 GN=1-SST PE=1 SV=1
HORVU.MOREX.r3.1HG0085470	6.74	0.14	-5.4747	4.0663e-10	1.6368e-06	3-ketoacyl-CoA synthase 11 [Hordeum vulgare]	GO:0006633(fatty acid biosynthetic process);GO:0016021(integral component of membrane);GO:0016747(transferase activity, transferring acyl groups other than amino-acyl groups)	K15397	KCS	http://www.genome.jp/dbget-bin/www_bget?ko:K15397	lipid metabolism	ko00062(Fatty acid elongation);ko04626(Plant-pathogen interaction)	*	*	sp|Q7XEM4|KCS20_ORYSJ	Probable 3-ketoacyl-CoA synthase 20 OS=Oryza sativa subsp. japonica OX=39947 GN=KCS20 PE=1 SV=1
novel.5181	0.61	5.05	3.1371	1.8022e-05	0.008705	predicted protein [Hordeum vulgare subsp. vulgare]	GO:0004497(monooxygenase activity);GO:0005506(iron ion binding);GO:0016021(integral component of membrane);GO:0016705(oxidoreductase activity, acting on paired donors, with incorporation or reduction of molecular oxygen);GO:0020037(heme binding)	K15398	CYP86A4S	http://www.genome.jp/dbget-bin/www_bget?ko:K15398	lipid metabolism	ko00073(Cutin, suberine and wax biosynthesis)	*	*	sp|B3RFJ6|86A22_PETHY	Cytochrome P450 86A22 OS=Petunia hybrida OX=4102 GN=CYP86A22 PE=1 SV=1
HORVU.MOREX.r3.4HG0332840	0.15	2.2	3.8981	8.6239e-06	0.005629	37 kDa inner envelope membrane protein, chloroplastic [Hordeum vulgare]	GO:0008168(methyltransferase activity);GO:0016021(integral component of membrane);GO:0032259(methylation)	K12502	VTE3, APG1	http://www.genome.jp/dbget-bin/www_bget?ko:K12502	quinone	ko00130(Ubiquinone and other terpenoid-quinone biosynthesis)	*	*	sp|Q2QM69|BQMT2_ORYSJ	2-methyl-6-phytyl-1,4-hydroquinone methyltransferase 2, chloroplastic OS=Oryza sativa subsp. japonica OX=39947 GN=Os12g0615400 PE=2 SV=2
HORVU.MOREX.r3.6HG0599280	0.08	1.61	4.3082	1.3486e-06	0.0014804	predicted protein [Hordeum vulgare subsp. vulgare]	GO:0004028(3-chloroallyl aldehyde dehydrogenase activity);GO:0006081(cellular aldehyde metabolic process)	K00128	E1.2.1.3	http://www.genome.jp/dbget-bin/www_bget?ko:K00128		ko00330(Arginine and proline metabolism);ko00340(Histidine metabolism);ko00310(Lysine degradation);ko00380(Tryptophan metabolism);ko00280(Valine, leucine and isoleucine degradation);ko00053(Ascorbate and aldarate metabolism);ko00010(Glycolysis / Gluconeogenesis);ko00620(Pyruvate metabolism);ko00071(Fatty acid degradation);ko00561(Glycerolipid metabolism);ko00410(beta-Alanine metabolism);ko00903(L…	KOG2454	Betaine aldehyde dehydrogenase	sp|Q70E96|AL3F1_ARATH	Aldehyde dehydrogenase family 3 member F1 OS=Arabidopsis thaliana OX=3702 GN=ALDH3F1 PE=2 SV=2
HORVU.MOREX.r3.7HG0720280	0	0.97	8.7681	3.4456e-07	0.00041607	polyamine oxidase [Hordeum vulgare]	*	K13366	MPAO, PAO1	http://www.genome.jp/dbget-bin/www_bget?ko:K13366		ko00330(Arginine and proline metabolism);ko00410(beta-Alanine metabolism)	KOG0029	Amine oxidase	sp|O64411|PAO1_MAIZE	Polyamine oxidase 1 OS=Zea mays OX=4577 GN=MPAO1 PE=1 SV=1
HORVU.MOREX.r3.4HG0418160	2.8	0.36	-2.9013	0.00016151	0.042865	Polyphenol oxidase A1, chloroplastic [Hordeum vulgare]	GO:0004097(catechol oxidase activity);GO:0046148(pigment biosynthetic process);GO:0046872(metal ion binding)	K00422	E1.10.3.1	http://www.genome.jp/dbget-bin/www_bget?ko:K00422	quinone	ko00350(Tyrosine metabolism);ko00950(Isoquinoline alkaloid biosynthesis)	*	*	sp|P43311|PPO_VITVI	Polyphenol oxidase, chloroplastic OS=Vitis vinifera OX=29760 PE=1 SV=1
HORVU.MOREX.r3.2HG0214680	18.79	1.7	-3.42	3.8893e-06	0.0027627	putative glutathione S-transferase [Hordeum vulgare]	*	K00799	GST, gst	http://www.genome.jp/dbget-bin/www_bget?ko:K00799		ko00480(Glutathione metabolism)	*	*	sp|Q9ZRW8|GSTUJ_ARATH	Glutathione S-transferase U19 OS=Arabidopsis thaliana OX=3702 GN=GSTU19 PE=1 SV=1	谷胱甘肽转移酶
HORVU.MOREX.r3.3HG0229590	0.08	1.19	3.823	0.00011276	0.031667	diacylglycerol 甘油二至O-acyltransferase 2-like isoform X1 [Aegilops tauschii subsp. tauschii]	GO:0016021(integral component of membrane);GO:0016747(transferase activity, transferring acyl groups other than amino-acyl groups)	K14457	MOGAT2, MGAT2	http://www.genome.jp/dbget-bin/www_bget?ko:K14457	lipid metabolism	ko00561(Glycerolipid metabolism)	KOG0831	Acyl-CoA:diacylglycerol acyltransferase (DGAT)	sp|K7K424|DAT2D_SOYBN	Diacylglycerol O-acyltransferase 2D OS=Glycine max OX=3847 GN=DGAT2D PE=1 SV=1
novel.280	3.08	0.16	-4.2016	0.00015473	0.04152	O-methyltransferase [Hordeum vulgare]	GO:0008171(O-methyltransferase activity);GO:0008757(S-adenosylmethionine-dependent methyltransferase activity);GO:0019438(aromatic compound biosynthetic process);GO:0032259(methylation);GO:0046983(protein dimerization activity)	K13066	E2.1.1.68, COMT	http://www.genome.jp/dbget-bin/www_bget?ko:K13066		ko00940(Phenylpropanoid biosynthesis)	*	*	sp|Q38J50|FOMT2_WHEAT	Tricetin 3&apos;,4&apos;,5&apos;-O-trimethyltransferase OS=Triticum aestivum OX=4565 GN=OMT2 PE=1 SV=1	五羟黄酮 tricetin 3',4',5'-O-trimethyltransferase
HORVU.MOREX.r3.3HG0274170	2.58	19.69	2.9873	3.0564e-05	0.012727	RecName: Full=Dihydroflavonol 4-reductase; Short=DFR; AltName: Full=Dihydrokaempferol 4-reductase; AltName: Full=flavanone 4-reductase; Short=FNR [Hordeum vulgare]	*	K13082	DFR	http://www.genome.jp/dbget-bin/www_bget?ko:K13082	lipid metabolism/anth	ko00941(flavonoid biosynthesis)	KOG1502	flavonol reductase/cinnamoyl-CoA reductase	sp|P51106|DFRA_HORVU	Dihydroflavonol 4-reductase OS=Hordeum vulgare OX=4513 GN=ANT18 PE=3 SV=1
HORVU.MOREX.r3.1HG0089900	0.59	5.22	3.1921	3.1775e-05	0.013007	caffeic acid-O-methyltransferase [Hordeum vulgare]	GO:0008171(O-methyltransferase activity);GO:0008757(S-adenosylmethionine-dependent methyltransferase activity);GO:0009809(lignin biosynthetic process);GO:0017096(acetylserotonin O-methyltransferase activity);GO:0019438(aromatic compound biosynthetic process);GO:0030187(melatonin biosynthetic process);GO:0030744(luteolin O-methyltransferase activity);GO:0032259(methylation);GO:0046983(protein dime…	K05279	E2.1.1.76	http://www.genome.jp/dbget-bin/www_bget?ko:K05279	lignin	ko00944(flavone and flavonol biosynthesis)	*	*	sp|Q84N28|FOMT1_WHEAT	flavone O-methyltransferase 1 OS=Triticum aestivum OX=4565 GN=OMT1 PE=1 SV=1	黄酮
HORVU.MOREX.r3.7HG0729300	0.26	0	-7.4334	0.0001648	0.043262	predicted protein [Hordeum vulgare subsp. vulgare]	*	K09490	HSPA5, BIP	http://www.genome.jp/dbget-bin/www_bget?ko:K09490		ko03060(Protein export);ko04141(Protein processing in endoplasmic reticulum)	KOG0100	Molecular chaperones GRP78/BiP/KAR2, HSP70 superfamily	sp|Q6Z058|BIP5_ORYSJ	Heat shock 70 kDa protein BIP5 OS=Oryza sativa subsp. japonica OX=39947 GN=BIP5 PE=1 SV=1
HORVU.MOREX.r3.1HG0094400	0.23	4.95	4.4729	4.5126e-08	7.9716e-05	fatty acyl-CoA reductase 1-like [Aegilops tauschii subsp. tauschii]	*	K13356	FAR	http://www.genome.jp/dbget-bin/www_bget?ko:K13356	lipid metabolism	ko04146(Peroxisome);ko00073(Cutin, suberine and wax biosynthesis)	KOG1221	Acyl-CoA reductase	sp|Q9LXN3|FACR4_ARATH	Probable fatty acyl-CoA reductase 4 OS=Arabidopsis thaliana OX=3702 GN=FAR4 PE=1 SV=1

## Sheet: Metablites data used
ID	Metabolites	P-value(EH/ZB)	log2(EH/ZB)	FC(EH/ZB)	average(ZB)	average(EH)	P-value(F2B/F2Y)	log2(F2B/F2H))	average(F2H)	average(F2B)		Moleculor Wt	Catolog
37	Caffeic acid	0.0115681	1.40799	2.65368	205.674	545.793	0.000882104	2.43408	362.012	1956.38	C9H8O4	180.042	Phenylpropanoids
58	Ferulic acid	0.00863292	0.954134	1.93742	1056.49	2046.86	0.00364384	0.768563	2877.01	4901.19	C10H10O4	194.058	Phenylpropanoids
17	4-Hydroxycinnamic acid/p-Coumaric acid	0.195591	0.411506	1.33007	389.495	518.058	0.0374929	0.55062	740.596	1084.76	C9H8O3	164.047	Phenylpropanoids
118	Sinapic acid	0.110591	0.385226	1.30606	678.986	886.8	0.937773	-0.017286	1591.62	1572.66	C11H12O	224.068	Phenylpropanoids
123	trans-Cinnamic acid	0.081473	-1.1137	0.462108	106.204	49.0778	0.193722	0.546466	86.5115	126.35	C9H8O2	148.052	Phenylpropanoids
8	2,4-Dihydroxybenzoic acid	0.000204662	2.28768	4.88269	4.75173	23.2012	0.0315073	0.978681	42.7894	84.3235	C7H6O4	154.027	Benzoic acid derivatives
63	Gallic acid	0.0343951	0.734098	1.66336	3.07904	5.12155	0.0027667	2.26476	2.30129	11.0594	C7H6O5	170.022	Benzoic acid derivatives
66	Gentisic acid	0.000362546	2.00473	4.01314	5.23682	21.0161	0.0195	0.882912	45.0019	82.9877	C7H6O4	154.027	Benzoic acid derivatives
102	Protocatechuic acid	0.00146685	2.7506	6.72997	39.3667	264.937	0.00192057	2.47754	75.928	422.88	C7H6O4	154.027	Benzoic acid derivatives
115	Salicylic acid	0.00454693	3.39672	10.5321	11.5359	121.497	0.0321014	1.55417	27.1638	79.7707	C7H6O3	138.032	Benzoic acid derivatives
120	Syringic acid	0.00170082	0.94969	1.93146	147.69	285.256	0.00217054	0.787917	299.527	517.157	C9H10O5	198.053	Benzoic acid derivatives
127	Vanillic acid	1.62828e-05	0.482211	1.39688	1101.53	1538.71	0.0475462	0.996887	1750.13	3492.7	C8H8O4	168.042	Benzoic acid derivatives
16	4-Hydroxybenzoic acid	0.824036	-0.0189343	0.986961	124.907	123.279	0.167713	0.236546	220.64	259.951	C7H6O3	138.032	Benzoic acid derivatives
45	Cryptochlorogenic acid	0.0160452	2.45916	5.49895	26.8871	147.851	0.00497136	4.15923	64.9828	1161.05	C16H18O9	354.095	Alcohols and polyols
14	3,4-Dihydroxybenzaldehyde	0.000129085	3.65049	12.5576	13.7838	173.092	9.25481e-05	4.06162	12.4135	207.284	C7H6O3	138.032	Catechols
119	Syringaldehyde	0.00313865	1.79327	3.466	14.1504	49.0451	0.00310648	1.93582	17.0548	65.2507	C9H10O4	182.058	Benzaldehydes
87	Narcissin	0.0162534	1.4924	2.81357	69.7561	196.263	0.027471	0.552708	227.584	333.828	C28H32O16	624.169	Flavonols
13	3,4-Dihydro-2H-1-benzopyran-2-one	0.0115525	20.0813	1.10933e+06	1e-06	1.10933	0.000686489	19.986	1e-06	1.03846	C9H8O2	148.052	Coumarins
24	Aesculetin	2.84058e-05	2.64387	6.25006	1.92911	12.057	0.00410574	3.17009	9.41228	84.7202	C9H6O4	178.027	Coumarins
25	Aesculin	0.013063	1.14782	2.21578	4.77007	10.5694	0.0228875	0.923409	30.6247	58.0826	C15H16O9	340.079	Coumarins
51	Daphnetin	0.0034189	3.38344	10.4356	1.43078	14.931	0.00784995	3.39798	8.6595	91.2821	C9H6O4	178.027	Coumarins
47	Cyanidin 3-O-rutinoside chloride	#NUM!	0	1	1e-06	1e-06	#NUM!	0	1e-06	1e-06	C27H31ClO15	630.135	Anthocyanins
48	Cyanin chloride	#NUM!	0	1	1e-06	1e-06	#NUM!	0	1e-06	1e-06	C27H31ClO16	646.13	Anthocyanins
52	Delphinidin 3-glucoside	#NUM!	0	1	1e-06	1e-06	#NUM!	0	1e-06	1e-06	C21H21O12	465.103	Anthocyanins
81	Malvin	#NUM!	0	1	1e-06	1e-06	#NUM!	0	1e-06	1e-06	C29H35O17	655.187	Anthocyanins
94	Pelargonidin-3-glucoside	#NUM!	0	1	1e-06	1e-06	#NUM!	0	1e-06	1e-06	C21H21ClO10	468.082	Anthocyanins
130	Pelargonidin chloride	#NUM!	0	1	1e-06	1e-06	#NUM!	0	1e-06	1e-06	C15H11ClO5	306.03	Anthocyanins

## Sheet: SNPs in candidates
GENE_ID	Pos	Ref	Alt	Annotation-location	Annotation-gene	Annotation-effect	Annotation-effect detail
HORVU.MOREX.r3.1HG0087150							-
HORVU.MOREX.r3.1HG0087150	499006947	A	T	UTR3	HORVU.MOREX.r3.1HG0087150(HORVU.MOREX.r3.1HG0087150.1:c.*381T>A)	-	-
HORVU.MOREX.r3.1HG0087150	499007018	T	G	UTR3	HORVU.MOREX.r3.1HG0087150(HORVU.MOREX.r3.1HG0087150.1:c.*310A>C)	-	-
HORVU.MOREX.r3.1HG0087150	499009156	T	C	exonic	HORVU.MOREX.r3.1HG0087150	synonymous SNV	HORVU.MOREX.r3.1HG0087150:HORVU.MOREX.r3.1HG0087150.1:exon5:c.A570G:p.T190T,
HORVU.MOREX.r3.1HG0087150	499009189	C	G	exonic	HORVU.MOREX.r3.1HG0087150	synonymous SNV	HORVU.MOREX.r3.1HG0087150:HORVU.MOREX.r3.1HG0087150.1:exon5:c.G537C:p.R179R,
HORVU.MOREX.r3.1HG0087150	499011408	A	G	intergenic	HORVU.MOREX.r3.1HG0087150(dist=1169),HORVU.MOREX.r3.1HG0087170(dist=10831)	-	-
HORVU.MOREX.r3.1HG0085470	495852045	T	A	intergenic	HORVU.MOREX.r3.1HG0085460(dist=3686),HORVU.MOREX.r3.1HG0085470(dist=1373)
HORVU.MOREX.r3.1HG0088450	500847800	C	A	intergenic	HORVU.MOREX.r3.1HG0088450(dist=4235),HORVU.MOREX.r3.1HG0088460(dist=31547)
HORVU.MOREX.r3.1HG0089480	503472268	T	C	downstream	HORVU.MOREX.r3.1HG0089480
HORVU.MOREX.r3.1HG0089480	503472283	G	A	downstream	HORVU.MOREX.r3.1HG0089480
HORVU.MOREX.r3.1HG0089900	504152561	A	G	intergenic	HORVU.MOREX.r3.1HG0089870(dist=162978),HORVU.MOREX.r3.1HG0089900(dist=2539)
HORVU.MOREX.r3.1HG0089900	504152949	T	TGGGC	intergenic	HORVU.MOREX.r3.1HG0089870(dist=163366),HORVU.MOREX.r3.1HG0089900(dist=2151)
HORVU.MOREX.r3.1HG0089900	504153571	A	G	intergenic	HORVU.MOREX.r3.1HG0089870(dist=163988),HORVU.MOREX.r3.1HG0089900(dist=1529)
HORVU.MOREX.r3.1HG0089900	504154532	C	T	upstream	HORVU.MOREX.r3.1HG0089900
HORVU.MOREX.r3.1HG0089900	504157603	C	T	downstream	HORVU.MOREX.r3.1HG0089900
HORVU.MOREX.r3.1HG0089900	504158076	T	C	downstream	HORVU.MOREX.r3.1HG0089900

## Sheet: qRT primer
gene id	primer id	5'-3'
HORVU.MOREX.r3.1HG0085470.1	470L	ATCACCATGCTGCTGTCAAC
	470R	TGAACGCACCATTTAGCCTG
HORVU.MOREX.r3.1HG0087150.1	150-2L	ACGGCGTTCATGAGAGATCT
	150-2R	ACTCATTCGATCCGTCCCTC
HORVU.MOREX.r3.1HG0088450.1	450L	GTTGCATGTCGTCGATGTCA
	450R	AACAATTGGCCCAACAGCAT
HORVU.MOREX.r3.1HG0089480.1	480L	CATCGCCTGTGTACTTGTCG
	480R	TTGAGAATGGCGGGGTAAGT
HORVU.MOREX.r3.1HG0089900.1	900L	AACTTCGACCTCCCACATGT
	900R	CACTCCACGACTACCACCTT
GAPDH	GAPDHL	CCCTTCATCACCACCGAGTA
	GAPDHR	CAGCGTCTTGTCGTCTTTGA
